# Supplementary material
Source: publisher site journal article supplement (https://www.spandidos-publications.com/600/downloadSupplementary)
Supplement: Supplementary file 1 [file downloadSupplementary]

## Sheet: single-cell RNA-seq by WGCNA
Table SVII. Gene network modules in single-cell RNA-seq by WGCNA.
	kMEblack	kMEpink	kMEgreen	kMEmagenta	kMEturquoise	kMEbrown	kMEred	kMEblue	kMEyellow	moduleColors	data$gene_short_name
ENSG00000001036.12	0.218732	0.0432666	0.173777	-0.0173433	0.298136	-0.0985336	0.0713147	-0.292334	-0.181689	turquoise	EIF2S3
ENSG00000001561.6	0.134223	0.0961265	0.0595181	0.141138	0.271436	-0.161095	-0.00642123	-0.252386	-0.188084	turquoise	PEX1
ENSG00000002549.11	0.186294	0.0436165	0.0635774	0.234673	0.200902	-0.257717	-0.123907	-0.17602	0.0818566	turquoise	NUDT12
ENSG00000002746.13	-0.0757052	0.075303	-0.0694848	0.0420562	0.0477556	0.133195	0.312786	-0.0784648	-0.0194299	red	RFC3
ENSG00000002822.14	-0.156529	-0.224031	0.0250917	-0.0197973	0.0705024	0.192409	0.198871	-0.0891934	-0.182918	turquoise	MAP1B
ENSG00000003056.6	0.189306	0.0349	0.155218	0.233706	0.677126	-0.136309	0.108676	-0.614453	-0.331222	turquoise	TGFA
ENSG00000003147.16	-0.139994	-0.0302514	-0.0136121	-0.0398601	-0.0591968	0.30875	0.330717	-0.0123452	-0.0725518	brown	ARFIP2
ENSG00000003402.18	-0.0464643	-0.148762	-0.214797	-0.340573	-0.433697	0.0717437	-0.291361	0.467241	0.139387	blue	TAF1C
ENSG00000004142.10	0.0489661	0.0792862	0.237996	0.198055	0.43299	-0.0413424	0.179719	-0.395799	-0.174706	turquoise	TMED9
ENSG00000004455.15	0.152727	0.159913	0.0396598	0.151313	0.286621	-0.0857709	0.176682	-0.307523	0.0459107	turquoise	IFNGR1
ENSG00000004534.13	-0.165657	-0.140039	-0.266944	-0.196657	-0.345219	0.209298	-0.107101	0.326982	0.206918	blue	LIMK1
ENSG00000004700.14	0.0416561	0.179998	0.156168	0.120928	0.284649	-0.209792	-0.0287882	-0.262088	-0.201747	turquoise	NFASC
ENSG00000005020.11	0.0457506	0.0540945	0.162294	0.140382	0.115562	-0.103677	0.0734009	-0.123461	-0.253327	turquoise	PRMT7
ENSG00000005022.5	-0.182868	-0.0276544	0.199906	0.0561066	0.367807	0.129327	0.357805	-0.361779	-0.216743	turquoise	F8A1
ENSG00000005059.14	-0.0674513	0.00700188	0.152532	0.0464729	0.0143783	-0.166539	-0.178056	-0.0232011	-0.0740792	green	TTC31
ENSG00000005075.14	0.177387	0.578137	0.139647	0.168839	0.325459	-0.087962	0.379452	-0.386786	-0.182178	pink	MAP7
ENSG00000005175.8	0.238605	0.154023	0.188401	0.0628362	0.157838	-0.380047	-0.256217	-0.126223	0.0578944	turquoise	RPN1
ENSG00000005339.11	-0.228625	-0.0749185	-0.0439665	-0.224151	-0.296688	0.0730343	-0.070321	0.303797	0.17835	blue	SEC24C
ENSG00000005448.15	-0.131276	0.0390483	0.196082	0.13385	0.259595	0.141063	0.489103	-0.328193	-0.203513	red	AP1B1
ENSG00000005812.9	0.165365	0.0998191	0.189504	0.0614497	0.0380557	-0.309586	-0.248227	-0.0232618	-0.100201	green	TMC8
ENSG00000005893.14	-0.0116105	0.0221919	0.0735397	0.0659795	0.465459	0.0527092	0.265527	-0.423907	-0.486224	turquoise	DDX52
ENSG00000006282.18	-0.113989	-0.0777173	-0.0887333	0.0022578	0.0354761	0.26428	0.219027	-0.0680882	-0.0882545	brown	MCRS1
ENSG00000006327.12	0.215173	0.271855	0.183344	0.199942	0.57555	-0.0313512	0.425217	-0.5953	-0.232051	turquoise	RUFY1
ENSG00000006451.6	0.14802	-0.0644149	0.150586	-0.0392781	0.151856	-0.149311	-0.133655	-0.103075	-0.00541207	turquoise	SLC41A1
ENSG00000006530.14	-0.016898	-0.0120146	0.0577292	0.149634	0.272272	0.074843	0.211003	-0.271645	-0.21436	turquoise	SMPD4
ENSG00000006534.14	-0.341944	-0.241527	-0.0791508	0.0272637	-0.0891444	0.388532	0.236024	0.0704886	-0.142324	brown	SNF8
ENSG00000006576.15	0.0578975	0.00317605	0.32138	0.320119	0.266357	-0.208626	-0.021773	-0.318424	-0.367231	green	CCNH
ENSG00000006744.17	-0.0241655	0.10687	0.13325	0.296625	0.36063	-0.0108458	0.19072	-0.338674	-0.0567372	turquoise	EIF3C
ENSG00000007038.9	0.0574236	0.315287	0.0782731	0.177212	0.184784	0.0163582	0.338932	-0.255815	-0.0987825	turquoise	MYO1D
ENSG00000007255.9	-0.115464	0.0132603	-0.125569	0.123016	0.100176	0.231646	0.321743	-0.127729	-0.2645	red	STARD10
ENSG00000007392.15	-0.00697624	-0.0835988	-0.143055	-0.200244	-0.201057	-0.0467578	-0.187914	0.220312	0.15387	blue	B3GNTL1
ENSG00000007923.14	0.196213	0.102533	0.15316	0.264471	0.519711	-0.0882212	0.206977	-0.532716	0.00530253	turquoise	ITGA2B
ENSG00000007944.13	-0.126723	0.0312307	-0.171293	-0.212803	-0.299386	0.0916801	-0.0106884	0.290416	0.0794936	blue	PACSIN1
ENSG00000008282.6	0.0351909	0.0269947	0.189199	0.115797	0.404557	-0.00253546	0.140837	-0.364636	-0.259664	turquoise	GNS
ENSG00000008300.13	-0.170004	-0.226779	-0.177087	-0.0945435	-0.293253	0.203437	-0.0474183	0.281708	0.0169145	blue	ZNHIT1
ENSG00000008323.14	-0.190434	-0.179018	-0.279963	-0.0354247	-0.218708	0.257169	-0.0212123	0.25054	0.134853	blue	CNST
ENSG00000008324.9	0.220891	0.190589	0.210813	0.132528	0.241672	-0.26614	-0.0288437	-0.230609	-0.0222896	turquoise	LMBR1
ENSG00000008394.11	0.200125	0.109595	0.14709	0.31218	0.595692	0.00693622	0.26061	-0.540498	-0.177853	turquoise	FBLN2
ENSG00000008405.10	0.317565	0.149812	0.290066	0.251206	0.354746	-0.302286	0.00173823	-0.371009	-0.084373	turquoise	STOX1
ENSG00000008517.15	0.0804003	-0.0572826	-0.0683118	-0.142483	-0.119705	-0.0336749	-0.0744153	0.145096	-0.0472101	blue	FAM91A1
ENSG00000008710.16	-0.141435	-0.142943	-0.129073	-0.189857	-0.365878	0.116869	-0.122998	0.377491	0.141654	blue	EID2B
ENSG00000008838.16	-0.247588	-0.146221	-0.0139842	0.0151609	0.0294933	0.311812	0.338248	-0.0459205	0.00405763	brown	KCNQ5
ENSG00000008952.15	0.273445	0.174231	0.051673	-0.108242	-0.164621	-0.287415	-0.302741	0.191922	0.133408	blue	CSRNP2
ENSG00000008988.8	0.0396844	0.10564	-0.159325	-0.136206	-0.210635	-0.0671166	-0.109749	0.253528	0.618197	yellow	MNS1
ENSG00000009307.14	0.0923468	0.0378704	0.285868	0.204229	0.449404	-0.13001	0.154573	-0.3973	0.00566686	turquoise	MSANTD3
ENSG00000009844.14	0.0858167	0.000692432	0.0837767	0.0481634	0.345752	0.00100177	0.183124	-0.307898	-0.250808	turquoise	FIBCD1
ENSG00000009954.9	-0.0787037	-0.0855454	-0.116496	-0.266801	-0.455731	0.0658044	-0.243212	0.453066	0.225284	blue	DPH6
ENSG00000010072.14	0.047501	0.0864216	0.264882	0.16594	0.250213	-0.194227	0.049852	-0.272906	-0.162002	turquoise	ADD1
ENSG00000010219.12	-0.187643	-0.0936568	-0.203661	-0.0395508	-0.073605	0.235043	0.116847	0.107407	0.0479285	blue	SPATA17
ENSG00000010270.12	0.18065	0.0748446	0.257866	0.238744	0.485621	-0.142816	0.148719	-0.436269	-0.159431	turquoise	SCO1
ENSG00000010278.10	-0.285332	-0.354805	-0.14536	-0.10376	0.114757	0.51729	0.28824	-0.0519149	-0.175517	brown	TFB2M
ENSG00000010322.14	-0.105229	-0.206884	-0.0882814	-0.0496083	-0.218824	0.137058	-0.0635353	0.216298	0.0484058	blue	APBA1
ENSG00000011105.10	0.142986	0.220474	0.0199705	0.165613	0.120315	-0.0187269	0.0992786	-0.16991	-0.0104512	turquoise	FLVCR1
ENSG00000011114.13	0.0277864	-0.0217456	0.000478699	-0.00394536	-0.205133	-0.133434	-0.221414	0.219604	0.284488	yellow	C9orf16
ENSG00000011198.6	0.163193	-0.0196771	-0.032301	0.0425299	0.125142	-0.178754	-0.220787	-0.102718	-0.00304384	turquoise	BRAT1
ENSG00000011260.12	0.25078	0.12819	0.156953	0.137214	0.375192	-0.231004	-0.049559	-0.327138	-0.0471441	turquoise	FAM122A
ENSG00000011295.14	0.0160248	-0.112115	-0.151491	-0.200355	-0.18482	0.108637	-0.0971844	0.237842	0.0855939	blue	SNRNP35
ENSG00000011405.12	0.129348	0.00145206	-0.0738248	-0.0390407	0.0321418	-0.116436	-0.235309	0.0281859	0.140297	turquoise	NIFK
ENSG00000011422.10	0.381588	0.119477	0.0307263	-0.0150181	0.24426	-0.236081	-0.173526	-0.207955	-0.0635465	turquoise	AP1G2
ENSG00000011454.15	-0.218863	-0.265541	-0.192925	-0.226407	-0.332066	0.193813	-0.0744968	0.323425	0.0765034	blue	ZNF385B
ENSG00000011523.12	-0.0985413	-0.166716	0.00125661	-0.049816	-0.123556	0.0287392	-0.138085	0.128875	0.00333981	blue	SEC14L2
ENSG00000011638.9	-0.195349	-0.201998	-0.227762	-0.136904	-0.245266	0.172037	-0.110703	0.27517	0.0637845	blue	ASB8
ENSG00000012171.16	-0.268077	-0.385228	-0.183176	-0.116041	-0.344848	0.38843	0.0603676	0.32975	0.0605052	blue	NMRK1
ENSG00000012660.12	0.114043	0.0265526	0.133197	0.251358	0.295948	-0.0238198	0.0886874	-0.294019	-0.19046	turquoise	CDC42EP1
ENSG00000012963.12	5.99292e-05	0.00893344	0.021595	-0.0614519	0.0145528	-0.0474823	-0.126813	0.000581729	-0.0720836	turquoise	C1GALT1C1
ENSG00000012983.10	0.147661	0.111652	0.253328	0.0835928	0.137413	-0.216633	-0.0252313	-0.124029	-0.0750587	green	PLEKHA2
ENSG00000013275.6	-0.117291	-0.259384	0.194576	0.166782	0.439404	0.0568332	0.147558	-0.376448	-0.177829	turquoise	SUPT4H1
ENSG00000013288.7	-0.219859	-0.163451	-0.0937617	-0.235695	-0.198035	0.267437	0.05066	0.189664	-0.0454907	brown	MDFI
ENSG00000013364.17	-0.194505	-0.299071	-0.315924	-0.16844	-0.094626	0.423267	0.196869	0.139822	0.0289229	brown	NSUN3
ENSG00000013375.14	0.0703913	0.0188601	0.145778	0.134984	0.373174	-0.115844	0.094865	-0.3584	-0.200298	turquoise	IVD
ENSG00000013561.16	-0.000318076	-0.105214	0.0359139	-0.146088	-0.0579124	-0.101963	-0.234517	0.074199	-0.0429433	blue	ZCCHC17
ENSG00000014164.6	-0.0592764	-0.180496	0.0172193	-0.035266	-0.00915192	0.0717848	-0.0148704	0.0337493	-0.0332516	turquoise	FURIN
ENSG00000014216.14	-0.312825	-0.22123	-0.0117395	0.103655	0.101528	0.575512	0.53021	-0.111418	-0.117834	brown	DZIP1L
ENSG00000014641.16	-0.0703861	0.00843356	0.153795	0.152946	0.422794	0.142212	0.399073	-0.388988	-0.202882	turquoise	DDT
ENSG00000014824.12	0.0549248	0.0425272	0.157511	0.123962	0.27451	0.038553	0.268457	-0.301782	-0.155576	turquoise	PDE4D
ENSG00000015153.13	0.166372	0.134097	-0.0604746	-0.0226273	-0.16468	-0.228129	-0.294729	0.190514	0.132518	blue	KIF15
ENSG00000015676.16	-0.300823	-0.250024	-0.0513235	-0.0964275	0.00163433	0.291464	0.238364	-0.0592762	-0.266274	brown	CNDP2
ENSG00000017260.18	0.0628241	0.0744854	0.0715781	0.224889	0.290554	-0.0367373	0.12737	-0.26164	-0.256163	turquoise	ANXA10
ENSG00000018189.11	-0.151687	-0.0346372	-0.093449	-0.156101	-0.409715	0.0837553	-0.172911	0.397529	0.257333	blue	OGG1
ENSG00000018510.11	0.223366	0.199631	0.134811	0.141378	0.203481	-0.318024	-0.103837	-0.174889	-0.0429259	turquoise	PBDC1
ENSG00000019186.8	0.0503211	-0.224612	-0.101213	-0.0990937	-0.195504	0.0573652	-0.183199	0.205557	0.0428532	blue	C1orf226
ENSG00000019582.13	0.0150534	0.0135163	-0.0655727	0.0353605	0.0559216	0.148654	0.164076	-0.0645925	-0.0545477	turquoise	RBBP6
ENSG00000020633.17	-0.0552073	-0.014296	-0.144129	-0.153247	-0.295085	-0.0242291	-0.175321	0.327825	0.258353	blue	EXTL3
ENSG00000022840.14	-0.34153	-0.262942	-0.103196	-0.0970656	0.10889	0.313599	0.17648	-0.0606073	-0.232957	brown	APBB1
ENSG00000023041.10	0.177556	0.184794	0.108243	0.10417	0.401154	-0.0984061	0.187481	-0.367978	-0.17029	turquoise	NADK2
ENSG00000023191.15	-0.192548	-0.144036	-0.0991185	0.0797714	0.145964	0.344662	0.396524	-0.152124	-0.00458517	red	IMPACT
ENSG00000023228.12	0.0864391	0.0542402	0.18577	0.131367	0.301184	-0.0719295	0.135973	-0.349065	-0.216102	turquoise	UBE2I
ENSG00000023608.4	0.258559	0.190727	0.101581	-0.069955	-0.0261806	-0.298904	-0.245369	0.016128	-0.0184352	black	ZNF35
ENSG00000023734.9	0.21526	0.0831448	0.266857	0.201443	0.458375	-0.315608	-0.143504	-0.369424	-0.018004	turquoise	ANKZF1
ENSG00000023909.8	0.248589	0.204707	0.234498	0.0718816	0.0616025	-0.274224	-0.112246	-0.0521412	0.0836193	green	EPN1
ENSG00000024422.10	-0.176977	-0.209813	-0.211329	-0.102706	0.0214588	0.365457	0.255887	-0.0215942	-0.0492347	brown	FAM72D
ENSG00000027001.8	-0.0402569	0.122523	0.148909	0.249767	0.271653	-0.105936	0.150663	-0.27216	-0.030856	turquoise	CNPY4
ENSG00000027847.12	-0.240813	-0.0554383	-0.0211274	-0.0555413	0.0295457	0.24438	0.344569	-0.0549092	-0.0671658	red	TUBA1B
ENSG00000028528.13	-0.00435204	0.0102373	0.0529254	0.130252	0.306793	0.166663	0.439869	-0.347522	-0.110572	red	SSSCA1
ENSG00000030582.15	-0.215605	-0.220048	-0.18392	-0.0551876	0.172996	0.437075	0.338154	-0.158797	-0.319896	brown	PRR5
ENSG00000031823.13	0.0450115	0.153344	-0.0112039	0.0178211	0.229931	-0.124451	-0.000502185	-0.179264	0.053993	turquoise	CTR9
ENSG00000033011.10	0.152664	0.105672	0.182974	0.224567	0.382606	-0.0528056	0.176416	-0.3993	-0.087485	turquoise	PUS1
ENSG00000033050.6	0.169778	0.184554	0.142221	0.230343	0.389817	-0.0543501	0.269102	-0.412784	-0.0184082	turquoise	ANP32B
ENSG00000033170.15	-0.197074	-0.270041	0.0209615	-0.0410494	-0.0445769	0.209916	0.109427	0.0375704	-0.150869	brown	UBE2E1
ENSG00000033178.11	0.0856269	0.0109806	0.191902	0.0391465	0.171126	-0.0548629	0.0691853	-0.173969	-0.191102	turquoise	ARL6
ENSG00000034053.13	-0.123828	-0.0644719	-0.12699	-0.0271111	-0.190555	0.155919	0.0400602	0.165012	0.0136588	blue	CTPS1
ENSG00000034152.17	-0.0712621	-0.246501	-0.058093	0.0272801	0.133108	0.103644	0.0242871	-0.0586514	0.0241877	turquoise	HIST2H2BE
ENSG00000034510.5	0.30028	0.0437212	-0.0519795	-0.142467	0.0222341	-0.0431838	-0.112687	0.0156993	0.0957177	black	MYH9
ENSG00000034713.6	-0.0601186	-0.110954	-0.0170307	0.0226729	0.156957	-0.0516763	-0.0293114	-0.130293	-0.173206	turquoise	COA4
ENSG00000035115.20	-0.132734	-0.175531	-0.144913	0.0112951	-0.121734	0.145961	-0.0306311	0.162825	0.182996	yellow	ANAPC5
ENSG00000035141.6	0.23351	0.35142	0.0774137	0.238631	0.27906	-0.232493	0.0596103	-0.288921	0.126643	pink	TFIP11
ENSG00000035499.11	-0.077749	0.0431223	0.639203	0.0944089	0.256001	-0.18561	0.0747026	-0.32067	-0.321756	green	FASTKD2
ENSG00000035681.6	-0.0100556	0.167432	0.0272864	0.152719	0.0323908	-0.0797245	0.0956613	-0.0476496	0.0807637	magenta	APH1B
ENSG00000035862.11	-0.086841	-0.141342	-0.124832	-0.151387	-0.357611	0.141681	-0.141748	0.412063	0.125047	blue	ZNF34
ENSG00000035928.13	0.0559418	-0.154525	-0.0753855	-0.112777	-0.234375	-0.096861	-0.307574	0.264509	0.310659	yellow	TTC1
ENSG00000036054.11	0.0360364	0.0192262	0.206714	0.173013	0.329528	-0.097441	0.121402	-0.323117	-0.317602	turquoise	FBXL20
ENSG00000036672.14	0.0908258	0.0772058	0.117593	0.00107441	0.113731	-0.100438	-0.0993724	-0.0932085	-0.0133739	turquoise	UBXN1
ENSG00000037241.6	0.176326	0.301037	0.110793	0.089926	0.277422	-0.272122	0.063004	-0.269407	0.0656041	turquoise	CDKN2C
ENSG00000037474.13	0.280706	0.0588663	0.126697	0.198073	0.353482	-0.166246	0.109605	-0.331977	0.0173722	turquoise	GNPAT
ENSG00000038274.15	0.0510844	-0.0274498	0.195492	0.217179	0.40954	-0.0406604	0.207596	-0.431533	-0.327973	turquoise	C7orf49
ENSG00000039068.17	-0.212823	-0.227504	-0.231826	-0.133471	-0.15676	0.516383	0.253815	0.174438	-0.0300383	brown	AEN
ENSG00000040341.16	0.0813954	0.0916835	0.0103116	0.118796	0.179383	-0.107139	-0.0049866	-0.162292	-0.0456547	turquoise	CDKL2
ENSG00000040608.12	-0.260376	0.000243501	-0.197708	-0.03472	-0.135566	0.280594	0.223036	0.117417	0.00775825	brown	CLDN23
ENSG00000041357.14	0.0429645	0.323067	0.350448	0.217373	0.379947	-0.184225	0.271676	-0.354034	-0.0880365	pink	SLC29A2
ENSG00000041880.13	-0.0421859	0.0663328	0.221537	0.0955072	0.16298	0.0462046	0.267567	-0.222945	-0.192705	turquoise	KDM4C
ENSG00000042286.13	0.00725941	0.11722	0.175293	0.654772	0.446959	-0.01138	0.348907	-0.473036	-0.0890978	magenta	ZC3H12C
ENSG00000043093.12	0.304437	0.0788352	0.0286233	0.110948	0.1198	-0.237128	-0.180691	-0.0923103	0.0130758	black	ALDH2
ENSG00000044446.10	-0.114617	-0.159521	-0.158332	-0.040868	-0.259592	0.155817	-0.075724	0.257791	0.139551	blue	MTRNR2L12
ENSG00000044574.7	0.089274	0.134023	-0.162722	0.0553281	0.116239	0.0483503	0.231748	-0.110287	-0.0777534	red	RHBDD1
ENSG00000046651.13	-0.062346	-0.231738	-0.15652	0.0244189	-0.13999	0.101474	-0.135211	0.170551	-0.0248606	blue	ZNF224
ENSG00000047188.14	0.13393	0.193679	0.0688983	-0.0287969	-0.00266686	-0.1398	-0.0498274	0.00517666	0.011086	pink	GPAM
ENSG00000047249.15	0.138877	0.0213783	0.242573	0.111917	0.362128	-0.24233	-0.164317	-0.283249	-0.17925	turquoise	ABI2
ENSG00000047346.11	-0.0662011	-0.199979	-0.1472	-0.180052	-0.126109	0.0643482	-0.147781	0.187155	0.00516467	blue	COQ2
ENSG00000047365.10	0.0207976	-0.0366422	-0.241223	-0.0555739	-0.257653	-0.0480566	-0.236313	0.292078	0.175775	blue	SPARC
ENSG00000047849.20	-0.15242	-0.245919	-0.168916	-0.000437407	-0.0960165	0.353957	0.209836	0.100148	-0.00640608	brown	TFR2
ENSG00000048162.18	0.1966	0.188882	0.0378728	0.12882	0.181435	-0.15058	0.0372994	-0.157438	0.258146	turquoise	WDR83
ENSG00000048405.8	0.0659675	0.0606145	-0.018272	-0.181078	-0.263764	-0.193629	-0.310801	0.271402	0.174323	blue	ARHGEF4
ENSG00000048471.12	-0.147312	-0.168006	-0.0203429	-0.0645523	-0.166189	0.20127	0.102592	0.140736	-0.0775372	blue	ZBTB33
ENSG00000048649.12	0.00629222	-0.115481	-0.0402496	-0.210115	-0.395582	-0.108313	-0.442308	0.431286	0.251493	blue	NDUFV3
ENSG00000049239.11	-0.28211	-0.208534	-0.298919	-0.149367	-0.276982	0.441028	0.23367	0.26752	-0.00111629	brown	TNFRSF12A
ENSG00000049323.14	-0.176495	-0.150747	-0.120808	-0.0700264	-0.188222	0.271984	0.124493	0.162005	0.0333315	brown	HDAC6
ENSG00000049656.12	0.366785	0.320374	-0.0118142	0.0828434	0.235245	-0.191073	0.0952063	-0.224168	0.067711	turquoise	ZBTB17
ENSG00000050130.16	0.0537362	-0.0191028	0.219938	0.148429	0.437916	-0.0421648	0.244225	-0.464138	-0.34896	turquoise	TPST1
ENSG00000050344.8	0.121118	0.199365	-0.0389955	0.144053	-0.114965	-0.014306	0.0880748	0.113559	0.234046	yellow	REEP2
ENSG00000050426.14	-0.31121	-0.347689	-0.123645	-0.217582	-0.197307	0.327492	0.0317561	0.197848	0.0351907	brown	MON1A
ENSG00000050820.15	-0.161689	-0.102739	-0.144872	-0.154721	-0.236174	0.363921	0.218035	0.203116	0.055904	brown	CLDN7
ENSG00000051523.9	0.209251	0.459303	0.0957716	0.164486	0.322877	-0.113837	0.220443	-0.381088	-0.147394	pink	NPLOC4
ENSG00000051596.8	0.113862	0.547109	0.242977	0.147414	0.341762	-0.255869	0.202326	-0.406938	-0.188461	pink	PKN1
ENSG00000052344.14	-0.285328	-0.271418	-0.137072	-0.103962	0.129551	0.533417	0.346525	-0.0996181	-0.146959	brown	C10orf67
ENSG00000052749.12	0.0145973	-0.189391	-0.148475	0.036347	-0.0973521	0.0995726	-0.0713836	0.129463	0.16176	yellow	THYN1
ENSG00000052802.11	0.297561	0.285893	0.0683888	0.185201	0.312322	-0.196919	0.068498	-0.347265	-0.168927	turquoise	LRRC42
ENSG00000053747.14	0.129215	-0.199105	-0.0591836	-0.084616	0.116913	0.098774	0.000308083	-0.0738247	0.00386323	turquoise	NOL4L
ENSG00000054116.10	0.106033	0.199668	0.183673	0.160844	0.325051	-0.104535	0.212027	-0.355456	-0.0171697	turquoise	ARID4A
ENSG00000054148.16	-0.08181	0.218379	0.071819	0.109327	0.258081	0.174458	0.597704	-0.306258	-0.113946	red	ABT1
ENSG00000054282.14	-0.0490667	-0.09438	-0.147984	-0.0797916	-0.140973	0.0842112	0.000910231	0.142673	0.0135204	blue	C3orf18
ENSG00000054392.11	0.139451	0.00964173	0.0232493	0.0878818	0.0298466	-0.0771633	-0.0475744	-0.033265	-0.0130362	turquoise	OXCT1
ENSG00000054654.14	-0.405428	-0.270649	-0.0783264	-0.137104	-0.292778	0.361427	0.142167	0.243299	0.0101648	brown	ALCAM
ENSG00000054793.12	-0.291848	-0.324027	-0.0726805	-0.181405	-0.211119	0.3589	0.0893699	0.240365	0.0521861	brown	NME1
ENSG00000054967.11	0.00141721	0.0215049	-0.0426455	-0.163031	-0.164228	-0.108504	-0.234415	0.177563	0.0565721	blue	RGS12
ENSG00000055070.15	0.160624	0.339333	0.112015	0.128924	0.263097	-0.240171	0.0601947	-0.291059	0.0816587	turquoise	PLEKHG6
ENSG00000055130.14	0.0332979	0.127538	0.0904125	0.233248	0.206106	0.0433586	0.231554	-0.244968	-0.0985254	turquoise	KLF4
ENSG00000055609.16	-0.227989	-0.217416	-0.274755	-0.0915577	-0.459009	0.296826	0.0177403	0.452082	0.146846	blue	DERL1
ENSG00000056586.14	0.123061	-0.00295106	0.118398	-0.0657746	-0.0572913	-0.155203	-0.264031	0.0482784	-0.0843971	green	SLC4A10
ENSG00000057252.11	0.135323	0.243147	0.231667	0.202421	0.297217	-0.277622	0.0431873	-0.332064	-0.242521	turquoise	FAP
ENSG00000057294.12	-0.0513193	-0.119757	0.0297321	0.232532	0.0982938	0.256382	0.295074	-0.122086	-0.1161	brown	GYG1
ENSG00000057663.11	0.108491	-0.00166682	0.269069	0.131311	0.438815	-0.160878	0.0891663	-0.426686	-0.232629	turquoise	FOXA1
ENSG00000058668.13	-0.231809	-0.208802	-0.248828	-0.206381	-0.221891	0.387309	0.175817	0.236979	0.114583	brown	ARG2
ENSG00000058729.9	0.116629	0.00809423	-0.0057778	0.0625543	0.118981	-0.151115	-0.10679	-0.0742421	0.0842491	turquoise	RHOQ
ENSG00000058804.11	-0.0328912	-0.0349438	0.634503	0.246221	0.306778	-0.187495	0.111956	-0.354284	-0.0304814	green	HEBP2
ENSG00000059122.15	-0.158465	-0.103188	-0.0903802	-0.0549022	-0.323572	0.173715	0.0230765	0.289184	0.0913437	blue	CCDC121
ENSG00000059588.8	-0.108769	-0.0498723	-0.156832	-0.159291	-0.27727	0.193183	0.09901	0.217484	0.0937968	blue	AURKA
ENSG00000059804.14	-0.0239025	-0.278885	-0.280404	-0.259064	-0.283903	0.221219	-0.185973	0.335875	0.0073017	brown	LYSMD1
ENSG00000060656.18	-0.18764	-0.191927	-0.188127	-0.0669951	-0.137659	0.276589	0.131853	0.10414	0.0341439	brown	ZDHHC6
ENSG00000060762.17	0.179745	0.220026	0.187562	0.171579	0.242764	-0.138202	0.119094	-0.261532	-0.146357	turquoise	TRAF3
ENSG00000061676.13	0.110387	0.0236945	0.0755002	0.0511965	0.0920603	-0.127972	-0.0440997	-0.0870526	-0.000511128	turquoise	VWA8
ENSG00000061936.8	-0.168025	-0.108843	-0.0926443	-0.0660346	-0.312718	0.0244516	-0.171777	0.294661	0.147674	blue	FAM111A
ENSG00000062038.12	-0.297638	-0.420493	-0.245609	-0.136574	-0.121211	0.577634	0.197887	0.150215	0.0158416	brown	NQO1
ENSG00000062725.8	-0.114554	-0.215886	-0.113393	-0.0686661	-0.116342	0.130247	-0.0987581	0.186199	-0.00057411	blue	JAKMIP3
ENSG00000063046.16	-0.00968514	-0.109276	-0.141334	-0.105751	-0.0846753	0.0511893	-0.134094	0.168462	0.444302	yellow	ARFIP1
ENSG00000063177.11	-0.200639	-0.243887	-0.220989	-0.140292	-0.14779	0.260502	0.0671437	0.196598	0.451688	yellow	CEBPZOS
ENSG00000063660.7	-0.239414	-0.226653	-0.314424	-0.149225	-0.389706	0.405239	0.113929	0.402628	0.157826	brown	MAP4K1
ENSG00000063854.11	-0.202565	-0.00445408	0.139902	0.0732653	0.214561	0.247915	0.47197	-0.279138	-0.28381	red	ANAPC2
ENSG00000064042.16	0.115381	0.0665947	-0.110028	0.192349	0.0483008	0.0296027	0.145106	-0.0602996	-0.0567713	magenta	IRX4
ENSG00000064115.9	-0.0128173	0.211591	0.0226523	0.0642245	0.0361	0.053691	0.161381	-0.0456538	-0.0209242	turquoise	SPICE1
ENSG00000064666.13	0.0870246	-0.104968	0.0751062	0.200062	0.526051	0.135918	0.339284	-0.462404	-0.121141	turquoise	NUP62CL
ENSG00000064726.8	0.182331	0.276902	-0.0310028	0.0475376	0.0567906	-0.231847	-0.0644534	-0.0408811	0.159145	pink	GPR171
ENSG00000064999.13	-0.0916551	-0.106656	-0.117304	0.0960242	-0.145315	0.0370549	-0.112122	0.177111	0.0422752	blue	NSRP1
ENSG00000065054.12	0.164861	0.359422	-0.0502818	-0.0355345	-0.109376	-0.115604	0.0504153	0.0476313	0.0939745	pink	RNPEP
ENSG00000065135.8	0.118892	0.0197323	0.239727	0.235594	0.388226	-0.22649	-0.0337739	-0.372511	-0.116312	turquoise	DGKA
ENSG00000065361.13	-0.177167	-0.127905	-0.0525986	-0.111635	-0.200035	0.20335	-0.0201181	0.190511	0.0305005	blue	SLC35A1
ENSG00000065427.13	0.0763992	-0.0365998	0.0904517	0.237802	0.313323	-0.0615008	0.0500777	-0.26544	0.0401214	turquoise	GINS3
ENSG00000065526.9	-0.140104	-0.0696129	-0.173184	-0.118431	-0.430315	0.0326525	-0.220924	0.459072	0.262806	blue	NADK
ENSG00000065548.16	0.131891	-0.132131	-0.136329	-0.0383145	-0.0980908	-0.120199	-0.307649	0.174256	0.338353	yellow	DHRS12
ENSG00000065600.11	0.1515	0.0278109	0.181845	0.0927833	0.244007	-0.178989	-0.0988132	-0.238965	-0.0933006	turquoise	CHMP2B
ENSG00000065613.12	0.0659243	-0.0939293	-0.128666	-0.137686	-0.300296	-0.0763592	-0.270946	0.345606	0.259638	blue	ZNF547
ENSG00000065615.12	0.0896441	0.138954	0.218809	0.0711394	0.20529	-0.14237	0.021987	-0.21631	-0.110055	turquoise	CHAC1
ENSG00000065665.19	0.111007	-0.0438804	0.0508283	-0.0510543	-0.0156248	-0.160485	-0.240685	0.0436845	0.0198648	turquoise	CASK
ENSG00000065833.8	0.0878059	0.162975	0.193621	0.107943	0.290569	-0.0743675	0.216846	-0.310038	-0.110263	turquoise	DUT
ENSG00000065882.14	-0.102784	-0.152772	-0.179547	-0.0444289	-0.180543	0.135659	-0.0754307	0.204804	0.0981865	blue	FAF2
ENSG00000065911.10	0.245245	0.102498	0.318672	0.0304572	0.201651	-0.234862	-0.170508	-0.22352	-0.0902911	green	RHBDD3
ENSG00000066084.11	-0.176864	-0.286154	-0.303054	-0.138861	-0.233354	0.241567	-0.0408182	0.292955	0.192213	blue	RNF123
ENSG00000066117.13	-0.13733	-0.104713	-0.0590362	-0.123747	-0.142431	0.0837613	-0.0371589	0.191417	0.237964	yellow	CDC25A
ENSG00000066322.11	0.181952	0.158399	0.0920474	0.143903	0.443113	-0.0502051	0.176512	-0.416915	-0.0574015	turquoise	TDP1
ENSG00000066379.13	-0.0934258	-0.0936001	-0.0652473	-0.0409153	-0.314957	-0.0185173	-0.278727	0.327135	0.232541	blue	PSD4
ENSG00000066427.20	-0.115524	-0.0620652	-0.101948	-0.0498095	-0.259898	0.0209477	-0.135356	0.25058	0.0124076	blue	MTM1
ENSG00000066468.19	-0.330674	-0.125825	0.00217816	0.0371929	-0.196475	0.23704	0.171496	0.162637	-0.0688626	brown	BCL2L11
ENSG00000066557.5	0.087954	0.167995	0.341938	0.162471	0.349212	-0.201533	0.0506608	-0.371371	-0.236317	turquoise	TRAF1
ENSG00000066651.16	0.143511	0.0937052	0.212575	0.155693	0.172688	-0.106489	0.0923608	-0.209477	0.0172226	turquoise	C6orf203
ENSG00000067064.9	0.25112	0.268163	0.241372	0.257165	0.510962	-0.324529	-0.012928	-0.490083	-0.340885	turquoise	SDK1
ENSG00000067141.15	-0.196257	-0.170621	-0.151018	-0.122222	-0.108096	0.183567	0.0950452	0.119401	0.0164605	blue	CCS
ENSG00000067167.6	0.14508	0.0787945	0.173588	0.288586	0.463233	-0.202157	-0.00659781	-0.431759	-0.254186	turquoise	2017-09-11
ENSG00000067182.6	0.108188	-0.0734046	-0.196306	-0.0387144	0.0460157	0.0695037	-0.0722298	-0.0183083	0.127093	turquoise	PPP1R21
ENSG00000067225.16	0.0632303	0.100081	0.136082	0.248886	0.626876	0.0215528	0.349756	-0.584097	-0.122724	turquoise	USMG5
ENSG00000067334.12	0.222485	0.194236	0.192956	0.106489	0.189852	-0.318923	-0.142958	-0.172118	0.0841583	turquoise	U2AF2
ENSG00000067533.5	0.339271	0.230299	-0.00429544	0.0107736	-0.0130517	-0.301775	-0.198748	0.0469864	0.201567	black	AGBL5
ENSG00000067560.9	0.0484127	-0.118915	0.123296	0.137447	0.284227	-0.00495127	0.0119848	-0.207034	-0.104345	turquoise	BLVRA
ENSG00000067704.9	0.079525	0.108261	0.0851359	0.305567	0.354446	-0.00801756	0.331692	-0.365121	-0.0874409	turquoise	CD82
ENSG00000067836.11	0.00978393	0.152319	0.030497	0.158888	0.149813	0.102058	0.285217	-0.237602	-0.194275	turquoise	FAM210A
ENSG00000067992.11	-0.0954144	-0.0511924	-0.0234252	0.0202422	0.0969324	0.0845149	0.0281157	-0.0844636	-0.052356	turquoise	EGLN2
ENSG00000068079.6	-0.149279	-0.0325085	-0.00414361	0.00483327	0.11645	0.257548	0.305146	-0.154789	-0.240153	turquoise	KRT10
ENSG00000068097.13	-0.101449	-0.157635	-0.0586982	-0.0982431	-0.127264	0.0871326	-0.0948994	0.139094	0.183377	yellow	FOCAD
ENSG00000068615.15	0.0152196	0.181278	0.0183498	0.0227099	0.00427741	6.29648e-05	0.16572	-0.0769533	-0.122662	turquoise	ACO2
ENSG00000068697.6	0.110338	0.195466	0.171134	0.158658	0.397965	-0.192997	0.0814042	-0.359649	-0.213364	turquoise	PCBP4
ENSG00000068724.14	-0.228615	-0.124362	-0.312146	-0.130092	-0.313295	0.328377	0.103354	0.325995	0.166502	blue	RAB18
ENSG00000068784.11	-0.23074	-0.310452	0.0228147	-0.0741382	-0.196554	0.236348	-0.00397977	0.139808	-0.00742336	blue	ABL1
ENSG00000068903.18	-0.00611196	0.140966	0.123352	0.102796	0.396567	0.0864294	0.366877	-0.413896	-0.30705	turquoise	RPL15P3
ENSG00000068912.12	0.0477374	0.0516921	0.133511	0.270328	0.406212	-0.075637	0.141834	-0.37209	-0.189897	turquoise	HSD3B7
ENSG00000069329.14	0.0128391	0.00220001	0.12637	0.0449971	0.310986	-0.117778	-0.0315362	-0.276127	-0.0809444	turquoise	PTPN11
ENSG00000069345.10	0.123645	0.00180017	0.146796	0.140824	0.285289	-0.221727	-0.141691	-0.257239	-0.0411243	turquoise	ARID3B
ENSG00000069424.13	-0.0777603	0.0578722	-0.031532	0.0809231	0.0519433	0.156656	0.272241	-0.0874222	-0.0023151	red	BZRAP1
ENSG00000069482.6	0.33952	0.466341	0.0670961	0.0931902	0.014555	-0.419688	-0.198264	-0.0207565	0.337879	pink	ACTC1
ENSG00000069667.14	-0.0653067	-0.156279	-0.314226	-0.13863	-0.277402	0.078371	-0.157555	0.313429	-0.00769517	blue	ZNF449
ENSG00000070010.17	0.179131	0.381704	0.172352	0.105512	0.414988	-0.128747	0.287492	-0.443436	-0.222075	turquoise	C1orf210
ENSG00000070018.7	-0.0406542	0.0344608	-0.0541917	-0.135954	-0.0810695	0.0639351	-0.0782583	0.123808	0.0495924	blue	APOA1BP
ENSG00000070367.14	0.180487	0.18955	0.1215	0.0983857	0.235729	-0.273423	-0.0831528	-0.234139	-0.0926094	turquoise	TAPT1
ENSG00000070371.14	-0.137656	-0.16961	-0.176512	-0.134557	-0.165481	0.30273	0.128761	0.160657	-0.03588	brown	C8orf88
ENSG00000070423.16	0.210869	0.357119	0.0237129	0.0486427	0.0542283	-0.253184	-0.0859104	-0.0861014	0.0456991	pink	ZNF335
ENSG00000070495.13	0.219293	0.216355	0.0800415	0.0611481	0.179574	-0.356082	-0.273078	-0.118469	-0.0235218	turquoise	SUPT5H
ENSG00000070731.8	-0.213749	-0.140588	-0.0478487	-0.0630942	-0.180963	0.205583	0.0422382	0.132566	-0.108457	brown	TUBB
ENSG00000070761.6	0.175671	0.102386	0.0555236	0.0260006	0.300878	-0.199196	-0.0748121	-0.26979	-0.14164	turquoise	MED14
ENSG00000070770.7	0.130314	0.181235	0.0095213	-0.0472938	0.103479	-0.19722	-0.0550538	-0.0889679	0.0278379	turquoise	FAHD1
ENSG00000070961.13	0.171856	0.127523	0.0844381	0.0375168	0.0855368	-0.1472	0.0355059	-0.0882337	0.0386602	turquoise	BRWD3
ENSG00000071054.14	-0.0344993	-0.127353	-0.072648	-0.186877	-0.22726	0.0985798	-0.0558401	0.239213	0.213335	blue	PSMC1
ENSG00000071127.15	0.140226	0.0546604	0.193256	0.122145	0.41333	-0.0571191	0.157967	-0.396637	-0.0755896	turquoise	TTK
ENSG00000071189.20	-0.0887554	-0.0396255	0.0316248	0.0102979	0.00776737	0.120757	0.207933	-0.0647109	-0.150091	red	PTPRE
ENSG00000071205.10	0.0179549	-0.0254105	-0.159542	-0.200704	-0.248746	0.0685919	-0.153208	0.287948	0.223849	blue	RND3
ENSG00000071243.14	0.196079	0.24112	0.13285	0.0623261	0.126576	-0.167279	0.00741126	-0.162398	-0.0574688	turquoise	REV1
ENSG00000071539.12	-0.0245166	0.0178637	0.728013	0.125042	0.289602	-0.0695419	0.249772	-0.374693	-0.256913	green	CRYZ
ENSG00000072041.15	0.218004	0.107746	0.041509	0.123451	0.170077	-0.153593	0.0188057	-0.182074	0.0899183	turquoise	ATP7A
ENSG00000072042.11	0.0589127	0.12485	0.187883	0.0184265	0.288013	-0.0891373	0.11018	-0.300142	-0.16926	turquoise	PWWP2A
ENSG00000072071.15	-0.0219897	0.0534235	-0.234379	-0.00713147	-0.433775	0.0115435	-0.179203	0.415114	0.316922	blue	AGAP9
ENSG00000072135.11	-0.160849	-0.164948	-0.200942	-0.151286	-0.189976	0.160466	0.0159521	0.193217	0.0138449	blue	HM13
ENSG00000072274.11	0.374168	0.280031	-0.000878729	0.0315211	0.259668	-0.419322	-0.176832	-0.19109	0.0757603	turquoise	RSPH4A
ENSG00000072364.11	-0.0304597	-0.224525	-0.0772979	-0.205097	-0.22511	0.0190621	-0.231139	0.248347	0.0155333	blue	MTRF1
ENSG00000072401.13	0.184312	0.0606467	0.0142134	0.450102	0.223109	-0.162432	-0.02495	-0.215596	-0.121392	magenta	MTG1
ENSG00000072756.15	0.260063	0.133518	0.0428535	0.0820119	0.196913	-0.199559	-0.151556	-0.144321	-0.033668	turquoise	DMPK
ENSG00000072849.9	0.0918575	0.0936106	0.218805	0.0830189	0.284112	-0.213619	-0.0468407	-0.265224	-0.278358	turquoise	PSMG1
ENSG00000072864.11	-0.304095	-0.183697	0.276378	-0.0790811	-0.128029	0.110919	-0.00739104	0.082988	-0.177276	green	CD163L1
ENSG00000073331.16	-0.248777	-0.228019	0.00404215	-0.158459	-0.22976	0.166234	-0.0123203	0.214345	-0.115165	blue	DOK1
ENSG00000073350.12	-0.258824	-0.0762785	-0.275258	-0.125359	-0.30656	0.511292	0.288568	0.277008	0.138512	brown	SH2D5
ENSG00000073578.15	-0.138812	0.00138516	0.125241	0.187182	0.502109	0.205169	0.536044	-0.514849	-0.345324	turquoise	GADD45A
ENSG00000073614.10	-0.182775	-0.192331	-0.215386	-0.187712	-0.323441	0.137051	-0.0783651	0.33197	0.0481609	blue	ZNF326
ENSG00000073712.12	0.384703	0.180868	-0.0243301	-0.00869351	0.112524	-0.225868	-0.0890837	-0.103743	0.0170506	black	BOLA2B
ENSG00000073969.17	-0.0755113	-0.0948092	0.0578136	-0.0425044	0.132692	0.147058	0.223052	-0.182481	-0.12945	turquoise	TMPRSS6
ENSG00000074266.16	0.188312	0.211196	0.336975	0.14301	0.169844	-0.372352	-0.0923868	-0.203863	-0.13798	green	ADAMTS13
ENSG00000074356.15	-0.0931144	-0.0609817	-0.120976	-0.276166	-0.311745	0.106826	-0.106036	0.33402	0.155232	blue	ARHGEF37
ENSG00000074800.12	0.11275	0.0207025	0.243384	0.310123	0.597616	-0.135215	0.250304	-0.590876	-0.0750244	turquoise	AP2B1
ENSG00000074842.6	0.143531	0.338651	0.126886	0.184845	0.41705	-0.177485	0.199485	-0.395762	-0.210077	turquoise	CALM1
ENSG00000074964.15	-0.170713	-0.151977	-0.193642	-0.0700168	-0.229293	0.18095	-0.0217394	0.216323	0.0538484	blue	FAM76A
ENSG00000075043.16	6.06019e-05	-0.0505957	-0.166167	-0.0726411	-0.335835	0.0589625	-0.113492	0.316424	0.126334	blue	GNG10
ENSG00000075089.8	0.0124811	-0.0342723	-0.024831	0.00146968	0.0464031	0.00748526	-0.0615501	-0.00661259	0.0135665	turquoise	NEMF
ENSG00000075131.8	0.137588	0.0679976	0.00963783	0.0519397	0.277937	-0.199564	-0.0986938	-0.240431	-0.0633833	turquoise	SLC19A1
ENSG00000075188.7	0.0800247	0.0643602	0.396809	0.179448	0.461766	-0.237623	0.0737188	-0.413088	-0.133636	turquoise	TAF3
ENSG00000075213.9	-0.184198	-0.1549	-0.00554255	-0.0192207	-0.124525	0.313755	0.282322	0.0702522	-0.121315	brown	DDB2
ENSG00000075239.12	0.0985897	0.194407	0.124113	0.0933707	0.25569	-0.0514318	0.1699	-0.250775	-0.0210309	turquoise	COL26A1
ENSG00000075275.15	-0.225185	-0.229396	-0.232559	-0.234464	-0.254584	0.337933	0.119353	0.280456	0.116627	blue	ZNF488
ENSG00000075336.10	0.289843	0.204638	0.212236	-0.0722971	0.232387	-0.226308	0.0112265	-0.261349	-0.0933731	turquoise	HIST1H2BK
ENSG00000075340.21	0.132802	0.126477	0.453804	0.197152	0.240625	-0.214923	0.0546494	-0.297863	-0.242819	green	ANKRD54
ENSG00000075413.16	-0.0680394	-0.034481	-0.141818	-0.19333	-0.297484	0.0301338	-0.200601	0.339262	0.185942	blue	ZBTB26
ENSG00000075624.12	0.215255	0.126166	0.31158	0.282625	0.467658	-0.0199986	0.349308	-0.510292	-0.195769	turquoise	RHPN2
ENSG00000076043.8	0.192322	0.144774	0.187834	0.0758961	0.219333	-0.0665488	0.160384	-0.205194	-0.0296636	turquoise	PRPSAP1
ENSG00000076053.9	0.235218	0.185968	0.0959813	0.0589773	0.203073	-0.226862	-0.106453	-0.169895	-0.0514289	turquoise	ACOX1
ENSG00000076108.10	-0.237809	-0.259826	-0.234725	-0.238918	-0.235497	0.259419	-0.0301199	0.263741	0.190136	brown	PTTG1
ENSG00000076201.13	-0.139685	-0.106996	-0.138337	-0.211083	-0.200372	0.133607	0.0761285	0.204257	0.0343552	blue	NUDT1
ENSG00000076356.6	-0.204087	-0.105958	-0.292355	-0.14141	-0.2459	0.311121	0.120328	0.244347	0.0471429	blue	PLOD1
ENSG00000076382.15	-0.125982	0.0215469	0.786893	0.0995455	0.245221	-0.157704	0.0903498	-0.345121	-0.347234	green	RBM43
ENSG00000076554.14	0.218715	0.157437	0.317506	0.155255	0.218174	-0.272572	-0.0141431	-0.250639	-0.21542	green	PAPSS1
ENSG00000076685.17	0.241495	0.161449	0.0824161	0.127601	0.233493	-0.133722	-0.0376588	-0.278104	-0.212449	turquoise	ATG10
ENSG00000076706.13	-0.0213751	-0.0552944	0.0112228	-0.0762457	-0.0210572	0.044716	0.0344327	0.0360271	-0.144157	turquoise	CYB561A3
ENSG00000076864.18	-0.114229	0.0270805	-0.180792	0.00144437	-0.0872671	0.144169	0.131988	0.0572572	-0.021622	red	HIVEP2
ENSG00000077232.15	-0.0195519	-0.0875539	0.203631	0.134551	0.112225	0.0530706	0.186354	-0.16519	-0.218852	turquoise	FLT1
ENSG00000077312.7	0.210615	0.321618	0.130868	0.02982	0.125798	-0.179513	-0.0285842	-0.119005	0.132781	pink	SRA1
ENSG00000077782.18	-0.0398412	-0.0552502	-0.25254	-0.212461	-0.286273	0.178421	0.0198528	0.293837	0.124784	blue	DUSP5
ENSG00000077942.16	-0.289721	-0.333924	-0.0972693	0.0811994	-0.0135823	0.440097	0.289193	0.00343358	-0.129171	brown	ANXA8
ENSG00000078070.10	-0.0457215	0.0419695	0.0646028	0.112155	0.220384	0.134615	0.24833	-0.258118	-0.18582	turquoise	CDKN1B
ENSG00000078177.12	0.00431129	-0.158217	-0.104352	0.00759558	-0.117638	0.00914871	-0.229382	0.167449	0.0242167	blue	GOLPH3
ENSG00000078237.5	0.23966	0.2088	0.0964643	0.0546117	0.303251	-0.164172	-0.0274974	-0.266322	0.000523577	turquoise	IER5
ENSG00000078304.18	-0.00922316	0.00176268	0.324213	0.120455	0.241975	-0.210674	-0.0550815	-0.239488	0.0177706	green	CHD7
ENSG00000078319.8	0.0173889	0.136233	-0.00411287	0.206478	0.131041	-0.122357	0.00535501	-0.120979	0.00207476	turquoise	ANKRD6
ENSG00000078668.12	-0.0144331	0.106379	0.24562	0.211447	0.474031	0.0021475	0.267698	-0.456533	-0.151771	turquoise	TET1
ENSG00000078808.15	0.211839	0.452799	0.134188	0.0891927	0.035226	-0.182298	0.0535375	-0.145638	-0.14592	pink	LAP3
ENSG00000078967.11	-0.172611	-0.00230292	0.0244237	0.10003	0.130353	0.114754	0.221453	-0.139558	-0.102767	turquoise	TCEAL4
ENSG00000079134.10	0.0414819	0.0598709	0.216503	0.169359	0.224288	-0.0550084	0.0346246	-0.236409	-0.0703309	turquoise	S100A2
ENSG00000079215.12	-0.158672	-0.107609	-0.280441	0.166355	-0.191596	0.340634	0.24051	0.153561	0.12745	brown	ATP6V0B
ENSG00000079246.14	0.119841	0.175345	0.218047	0.12305	0.201681	-0.241464	0.0103606	-0.234671	-0.0710026	turquoise	RNF40
ENSG00000079308.15	0.0217152	-0.128649	-0.227567	-0.0639592	-0.223983	0.155496	-0.0528348	0.24551	0.119127	blue	CSK
ENSG00000079332.13	0.15667	0.198853	0.0728329	0.769845	0.270097	-0.210263	0.0272929	-0.247074	-0.133859	magenta	NPAT
ENSG00000079459.11	0.162306	0.192602	0.2476	0.151596	0.356507	0.0474073	0.402006	-0.431027	-0.205701	turquoise	VARS2
ENSG00000079482.12	-0.0804581	0.0636212	-0.0800827	-0.263113	-0.395691	0.0433264	-0.108771	0.385432	0.145602	blue	DGCR9
ENSG00000079691.16	0.0889766	0.197165	0.143255	0.200466	0.213256	-0.0395681	0.243194	-0.250594	-0.188271	turquoise	MEA1
ENSG00000079785.13	0.0729351	0.161851	0.173591	0.297487	0.375288	-0.0378957	0.355861	-0.405366	-0.0826224	turquoise	DHX32
ENSG00000080371.5	0.133557	0.101675	0.0791605	-0.238351	-0.2013	-0.26042	-0.321558	0.25403	0.193806	blue	KDM1B
ENSG00000080822.15	0.172854	0.116635	0.219674	0.16574	0.227906	-0.245344	0.0153659	-0.25481	-0.245497	turquoise	PBLD
ENSG00000081019.12	-0.135928	-0.143105	-0.00338701	-0.112489	-0.231309	0.00333077	-0.132241	0.218373	0.0997396	blue	ZBTB11
ENSG00000081087.13	0.302116	0.234962	0.00557051	-0.0380293	0.0294092	-0.220372	-0.0563048	-0.0639651	-0.0636661	black	REEP5
ENSG00000081154.10	0.208471	0.176738	0.265808	0.158826	0.262961	-0.366638	-0.175289	-0.22467	-0.0987498	green	2017-09-04
ENSG00000081307.11	0.0988035	0.161488	0.145819	-0.0545869	-0.0846455	-0.13026	0.0108179	0.00329848	-0.0492503	green	TRIM2
ENSG00000081320.9	0.0499976	0.0670726	0.369352	0.116582	0.16429	-0.171444	0.0204387	-0.22435	-0.280098	green	MMP15
ENSG00000081870.10	0.106101	0.193834	0.139352	0.133212	0.207036	-0.244005	-0.00818567	-0.189516	-0.041106	turquoise	PLEKHA5
ENSG00000082014.15	-0.109226	0.142242	-0.29194	-0.160948	-0.242033	0.188052	0.167802	0.2341	0.0686342	blue	RPL35
ENSG00000082146.11	-0.0197715	0.0572934	0.101827	0.0334347	0.311818	0.0158709	0.225128	-0.298262	-0.265346	turquoise	CRISPLD2
ENSG00000082153.16	0.387234	0.221476	0.281199	0.172874	0.440258	-0.470216	-0.252744	-0.372236	-0.127253	turquoise	CMC2
ENSG00000082438.14	-0.183308	-0.238347	-0.178251	-0.289123	-0.280949	0.162548	-0.120737	0.327155	0.0508981	blue	NXT2
ENSG00000082497.10	0.179288	0.241517	0.310239	0.179838	0.0101622	-0.302436	-0.129781	-0.0524395	0.0332052	green	PDS5B
ENSG00000082515.15	0.139487	0.178958	0.101112	0.11293	0.210175	-0.167746	0.0609709	-0.244961	-0.0533037	turquoise	INHBA
ENSG00000082641.14	-0.138186	-0.0614959	-0.228343	-0.216159	-0.49283	0.101763	-0.202721	0.526497	0.247987	blue	BCAM
ENSG00000082805.18	-0.307876	-0.150283	-0.208758	-0.138302	-0.282256	0.305534	0.15724	0.286448	0.0535623	blue	ARPC5
ENSG00000083123.13	0.122688	0.0607653	0.102427	0.120774	0.251307	0.00138848	0.201478	-0.280783	-0.148052	turquoise	TMOD2
ENSG00000083444.15	-0.359658	-0.311237	-0.0334535	0.011302	0.108451	0.463833	0.431109	-0.113083	-0.08305	red	TRAPPC6A
ENSG00000083457.10	0.0242394	0.261834	0.130115	0.0504204	0.227382	-0.0919237	0.0897339	-0.190084	0.0115861	turquoise	GAS6
ENSG00000083520.13	0.214252	0.120878	0.0226952	0.00663621	0.14022	-0.254552	-0.172623	-0.126434	-0.104313	turquoise	NUDT8
ENSG00000083535.14	0.0211106	-0.0760118	-0.1194	-0.111259	-0.191087	-0.093981	-0.326303	0.257777	0.0902826	blue	PRDX2
ENSG00000083544.12	-0.152803	-0.131434	-0.230348	-0.123859	-0.405707	0.155595	-0.159525	0.403017	0.127103	blue	SPRYD3
ENSG00000083799.16	0.104378	0.00462484	-0.0293078	-0.0405499	-0.0368036	-0.143909	-0.203568	0.0591808	-0.113407	turquoise	HTR1D
ENSG00000083812.10	0.115535	0.136723	-0.00743906	-0.0593004	-0.0039088	-0.131916	-0.182726	0.0189692	0.0523448	turquoise	C19orf24
ENSG00000083896.11	0.0405769	-0.0714617	-0.035555	-0.139773	-0.249832	-0.081539	-0.237494	0.257449	0.107267	blue	AMOTL2
ENSG00000083937.7	0.20363	0.060508	0.116238	0.0108464	0.109499	-0.21056	-0.230811	-0.0880922	0.0471433	turquoise	GLRX3
ENSG00000084073.7	0.260818	0.0821375	0.22232	0.296214	0.468699	-0.367794	-0.115045	-0.404015	-0.0347015	turquoise	MFAP3
ENSG00000084090.12	0.00771751	-0.000512173	-0.053545	0.0992306	0.0643726	-0.124432	-0.170083	-0.0280002	0.0288172	turquoise	GNPNAT1
ENSG00000084207.14	-0.244052	0.0302834	0.0407762	0.131442	0.272228	0.350768	0.596276	-0.304877	-0.0838689	turquoise	DONSON
ENSG00000084234.15	-0.322325	-0.145627	-0.194548	-0.281384	-0.205814	0.314138	0.148416	0.216292	-0.149108	blue	TM2D1
ENSG00000084444.12	0.000949513	0.166921	0.171393	0.0829655	0.288245	-0.0525127	0.186613	-0.313058	-0.282733	turquoise	TSACC
ENSG00000084636.16	0.0127154	-0.0790015	-0.217116	-0.135415	-0.414148	0.107613	-0.136285	0.387842	0.170907	blue	STRAP
ENSG00000084676.14	-0.154073	-0.113815	-0.241059	-0.106731	-0.188045	0.153756	0.0272459	0.213731	0.0816834	blue	PABPC4
ENSG00000084733.9	0.012506	-0.0111575	0.0689045	0.131021	0.34812	-0.0177108	0.124357	-0.285406	-0.00447128	turquoise	DLL3
ENSG00000084764.9	0.162039	0.172013	-0.125266	0.0826523	0.226703	-0.0615573	0.0338962	-0.211952	-0.117981	turquoise	DLD
ENSG00000084774.12	-0.0948754	-0.164779	-0.110851	-0.0579155	-0.124082	0.256713	0.196753	0.0824227	0.154759	brown	ALKBH5
ENSG00000085063.13	0.126218	0.0627328	0.0302446	-0.0506386	0.267578	-0.15524	-0.135109	-0.195988	-0.167822	turquoise	DCK
ENSG00000085231.12	0.292961	0.27198	0.316207	0.114801	0.363002	-0.393523	-0.0766394	-0.351623	-0.10222	turquoise	FOXO3
ENSG00000085377.12	0.167167	0.0301277	0.0831184	0.257299	0.352873	-0.0407691	0.118278	-0.354768	-0.0759072	turquoise	PARP2
ENSG00000085415.14	0.214944	0.064812	0.205704	0.221496	0.375545	-0.205955	0.00477691	-0.35971	0.0680016	turquoise	DYNC1H1
ENSG00000085491.14	0.166435	0.156755	0.406245	0.288709	0.338948	-0.273592	0.0174833	-0.372968	-0.2437	turquoise	FAR2
ENSG00000085552.15	-0.199881	-0.106615	-0.218189	0.0259455	-0.35344	0.300025	0.0948609	0.308708	0.0979471	blue	ARHGEF10L
ENSG00000085662.12	0.00627038	0.179394	0.158539	0.208555	0.517076	0.0340224	0.377627	-0.48794	-0.20825	turquoise	CCM2
ENSG00000085721.11	0.158893	-0.00643782	-0.0152774	0.0388932	0.0923228	-0.133862	-0.179002	-0.0694623	-0.0171032	turquoise	PGBD5
ENSG00000085741.11	-0.115614	-0.198404	-0.118653	-0.0782731	-0.0282619	0.227645	0.108065	0.0334077	-0.157936	brown	FNDC5
ENSG00000085788.12	-0.0740841	0.042692	0.0372942	0.036008	0.0288944	0.0472327	0.0927997	-0.0429215	-0.078418	turquoise	STAMBPL1
ENSG00000085871.7	0.0309748	0.0808441	-0.0335177	0.028392	0.0966055	-0.0731123	-0.0331967	-0.0795608	0.104749	turquoise	BIRC6
ENSG00000085978.20	0.0841063	0.00477332	0.0980231	0.129661	0.163028	-0.117341	0.00808907	-0.124384	-0.0160453	turquoise	SQLE
ENSG00000086015.19	-0.25504	-0.0647882	0.00268693	-0.106541	-0.194153	0.250277	0.179101	0.129046	-0.0496386	brown	USP28
ENSG00000086061.14	0.201587	0.0529281	0.28043	0.0990978	0.398095	-0.251843	-0.101764	-0.353607	-0.100556	turquoise	TNFRSF11A
ENSG00000086065.12	0.114303	0.0105833	0.265326	0.0495229	0.282087	-0.159462	-0.0242431	-0.289313	-0.264708	turquoise	NT5C3B
ENSG00000086189.8	0.196782	0.0832488	0.151408	0.203944	0.307742	-0.126024	0.0639663	-0.280201	-0.0109623	turquoise	ELOVL4
ENSG00000086232.11	-0.206852	-0.0227727	-0.0951047	0.0174061	-0.154462	0.275694	0.297831	0.132986	-0.0804067	red	DNAJB1
ENSG00000086598.9	0.164543	0.00127968	0.222987	0.208	0.601632	-0.153679	0.0705308	-0.541871	-0.221378	turquoise	HSP90B1
ENSG00000086619.12	0.0630271	0.127542	0.0179544	0.0435367	-0.0274405	-0.234783	-0.125428	0.0226339	-0.0284627	turquoise	ASAP3
ENSG00000086827.7	0.0279791	0.157701	0.339881	0.104969	0.283487	-0.184387	0.0867044	-0.290956	-0.198743	green	PLXDC1
ENSG00000087111.19	-0.289248	-0.260329	-0.162681	-0.0846459	-0.133357	0.405961	0.324085	0.108887	-0.125721	brown	BTBD6
ENSG00000087191.11	-0.204816	-0.039784	0.131737	0.184189	0.0883071	0.154372	0.410126	-0.107807	0.0725762	red	NANOS1
ENSG00000087206.15	0.0899181	0.108041	0.0442774	0.120406	0.0653085	-0.173457	-0.118712	-0.0855646	-0.0360487	turquoise	OPTN
ENSG00000087253.10	0.272087	0.114728	0.00266308	0.0610209	0.135633	-0.20888	-0.119046	-0.117396	-0.0182155	turquoise	CDH5
ENSG00000087269.14	0.0514655	0.109701	-0.056836	-0.172415	-0.180114	-0.147919	-0.264186	0.201554	0.183862	blue	HBS1L
ENSG00000087460.22	-0.24479	-0.213634	-0.265904	-0.325328	-0.682516	0.221528	-0.222028	0.700591	0.275375	blue	NSUN6
ENSG00000087502.16	0.0970109	0.0723569	0.165418	0.157913	0.205128	-0.122971	0.0198538	-0.211099	-0.267199	turquoise	CCNL1
ENSG00000087884.13	0.0459052	0.191032	-0.0132015	-0.0760152	0.0969245	-0.0446755	0.0873371	-0.0757073	0.0132026	turquoise	PKNOX1
ENSG00000088038.16	-0.0837438	-0.0177231	-0.0765276	-0.169021	-0.26074	-0.0299998	-0.163407	0.257998	0.165317	blue	FAM195B
ENSG00000088205.11	0.133116	0.0756758	-0.0588306	-0.0249811	-0.0524196	-0.236801	-0.290739	0.150581	0.329072	yellow	SALL4
ENSG00000088247.14	-0.105257	-0.0730702	-0.217302	-0.300152	-0.484845	-0.022744	-0.304484	0.520558	0.366587	blue	CDC42BPB
ENSG00000088256.7	0.0546095	0.135468	-0.0971128	-0.157149	-0.275755	-0.126159	-0.210618	0.311712	0.204123	blue	TPM2
ENSG00000088451.9	0.205141	0.135957	0.233908	0.0859211	0.253077	-0.233479	-0.068766	-0.239257	-0.217388	turquoise	SRRM2
ENSG00000088808.15	-0.182677	-0.196867	-0.216072	-0.239237	-0.454477	0.212077	-0.106245	0.453983	0.154211	blue	RSL1D1
ENSG00000088888.16	-0.18697	-0.171429	-0.133593	-0.067986	-0.160743	0.254607	0.093093	0.145626	-0.00900097	blue	ACBD6
ENSG00000089009.14	0.233341	0.380353	-0.0481145	0.156493	0.186203	-0.231963	0.00327884	-0.153934	0.496536	yellow	ABTB2
ENSG00000089053.11	-0.194057	-0.15408	0.0346589	0.075344	0.064624	0.235247	0.333498	-0.144921	-0.105193	brown	ATP9B
ENSG00000089154.9	-0.0632466	0.0320301	-0.146537	-0.0104391	-0.0483375	0.251725	0.261529	0.0585186	0.210683	brown	PCBD1
ENSG00000089157.14	0.0735778	0.160035	-0.0929936	0.0968164	0.20125	0.106199	0.32046	-0.19565	0.299972	yellow	ARIH1
ENSG00000089195.13	0.325669	0.159802	0.0291677	0.0683799	0.173287	-0.284455	-0.186218	-0.117364	0.114769	turquoise	PABPC1P3
ENSG00000089280.17	0.139139	0.203483	0.119867	-0.0577914	-0.0699596	-0.132692	0.0019753	0.013809	0.2093	yellow	SAMD4B
ENSG00000089356.15	-0.404678	-0.492873	-0.357151	-0.25692	-0.284676	0.567813	0.0449462	0.32582	0.0853545	brown	ITSN1
ENSG00000089486.15	-0.0752959	0.0350403	-0.0467734	0.0667094	0.00911578	0.00220952	-0.0453514	0.0169519	-0.0307248	turquoise	POLE
ENSG00000089737.14	0.156404	0.14232	0.0697252	-0.0650049	0.0928101	-0.266875	-0.183932	-0.0609375	0.0204965	turquoise	ZNF672
ENSG00000089818.15	0.113499	0.143187	0.0750691	0.132447	0.105105	-0.147807	-0.0129009	-0.129719	-0.0587892	turquoise	ERCC3
ENSG00000089902.9	0.0364869	-0.092523	0.0339207	-0.0208661	-0.0962708	-0.16763	-0.323612	0.133102	0.192205	yellow	MRPL36
ENSG00000090020.9	-0.124142	-0.00439151	-0.224364	-0.00934385	-0.239564	0.107434	-0.0632029	0.266296	0.182715	blue	COX15
ENSG00000090054.12	0.0430318	0.0752298	0.138424	0.130249	0.402592	-0.0681052	0.132702	-0.399274	-0.271752	turquoise	ABL2
ENSG00000090060.16	0.182207	0.162093	0.105282	0.166508	0.156357	-0.241845	-0.122332	-0.104926	0.0567057	turquoise	LRG1
ENSG00000090266.11	-0.0606739	0.188368	-0.0893895	0.0495671	-0.0821697	0.213518	0.356274	0.0447146	0.18149	pink	RPS6KC1
ENSG00000090520.9	0.277745	0.0959335	0.114445	0.110845	0.300663	-0.217287	-0.0120038	-0.242002	-0.0192542	turquoise	GNPTAB
ENSG00000090530.8	0.227935	0.0886402	0.0793439	0.238679	0.273672	-0.0840777	0.11788	-0.256479	-0.0122955	turquoise	LDHB
ENSG00000090581.8	-0.0681621	-0.0945768	-0.16104	-0.0345648	-0.129603	0.175971	0.0421856	0.128001	-0.095974	blue	YES1
ENSG00000090989.16	0.100292	0.0435944	0.0118626	-0.022089	-0.00141075	-0.0786765	-0.106373	0.0157329	0.0366391	turquoise	CPEB4
ENSG00000091009.7	-0.0187019	-0.00923238	-0.095673	-0.109492	-0.383058	-0.173964	-0.374849	0.40155	0.28792	blue	LIAS
ENSG00000091039.15	0.283305	0.137946	0.105164	-0.0460804	0.0361058	-0.18644	-0.0812116	-0.0448297	0.0549044	black	DYNLT3
ENSG00000091136.12	-0.226802	-0.0916622	-0.0363285	-0.0714397	-0.180076	0.451344	0.422787	0.107063	-0.0697481	brown	URB2
ENSG00000091140.11	0.0229748	0.0505646	0.0919506	0.183509	0.296901	0.0770373	0.337657	-0.306127	-0.160822	turquoise	KCNK1
ENSG00000091317.7	0.0324266	-0.208893	0.0427964	0.0804963	0.344887	0.0496437	0.0263592	-0.230083	-0.120574	turquoise	SUGP1
ENSG00000091409.13	-0.135559	-0.363476	-0.15734	-0.265136	-0.288605	0.251124	-0.0657595	0.353321	0.113518	blue	SMS
ENSG00000091483.6	0.0209688	0.105196	0.108817	0.293736	0.462368	0.0201031	0.335156	-0.420167	-0.0776341	turquoise	PDRG1
ENSG00000091592.14	-0.00775231	-0.0572397	-0.209791	-0.131938	-0.190872	0.0642699	-0.135899	0.209056	0.123093	blue	SERHL2
ENSG00000091831.20	0.000763019	-0.100277	-0.0932755	-0.134257	-0.275126	0.0735294	-0.190576	0.271468	0.155066	blue	PRRG1
ENSG00000091986.14	-0.132299	-0.221835	-0.0323436	-0.150843	-0.256941	0.248714	0.0329664	0.210007	0.026121	blue	NUP88
ENSG00000092010.13	-0.279114	0.0190844	-0.104539	0.0661052	0.00461857	0.452162	0.58165	-0.0671584	-0.068494	red	ZBTB49
ENSG00000092108.19	0.140021	0.0618016	0.0870827	0.167395	0.307579	-0.149095	0.0368869	-0.305466	-0.206995	turquoise	COMMD8
ENSG00000092140.13	0.0423548	0.0396888	0.605648	0.165647	0.229609	-0.261204	-0.0353718	-0.277071	-0.195802	green	FEM1B
ENSG00000092199.16	0.106059	0.0490957	0.0113115	0.230985	0.355884	-0.149001	-0.0203584	-0.282246	0.110525	turquoise	CDKN2AIP
ENSG00000092201.8	-0.208239	-0.240043	-0.100961	-0.156869	-0.178995	0.071148	-0.0547809	0.189511	0.145855	blue	SNRNP48
ENSG00000092621.10	-0.129191	0.0370454	0.0799963	-0.0270721	0.015708	0.113844	0.237618	-0.0905934	-0.0559991	turquoise	DHX29
ENSG00000092841.17	-0.175312	-0.00328896	-0.0550705	-0.100744	0.0226932	0.318613	0.317604	0.00430623	0.00771918	brown	PDSS2
ENSG00000093010.10	-0.053352	0.0375242	-0.0212902	0.158211	0.358823	0.345363	0.592505	-0.385719	-0.0727765	red	MINCR
ENSG00000093144.17	0.192407	0.0524165	0.132947	0.158761	0.272205	-0.0859375	0.0829958	-0.27618	0.0125977	turquoise	MLLT4
ENSG00000094916.12	-0.287969	-0.153268	-0.075384	-0.139711	-0.228473	0.173412	0.00682256	0.222504	-0.0551736	blue	GPX8
ENSG00000095002.11	0.0840975	0.168386	-0.0215757	0.0982036	0.162033	-0.110624	0.0139418	-0.178382	-0.0501039	turquoise	FAM21A
ENSG00000095209.10	0.174428	0.125937	0.26338	0.193505	0.460107	-0.238075	0.0826211	-0.451207	-0.351969	turquoise	SCCPDH
ENSG00000095261.12	0.123312	0.0512365	0.188777	0.340162	0.388285	-0.140599	0.112824	-0.396417	-0.199731	turquoise	NPHP1
ENSG00000095380.10	0.126495	0.229237	0.0824293	0.183674	0.382414	-0.0759837	0.188743	-0.353035	-0.113809	turquoise	FLG2
ENSG00000095564.12	-0.0770739	-0.232185	-0.00977492	-0.0340774	-0.140727	0.0716369	-0.123079	0.16825	0.0752146	blue	DLG5
ENSG00000096060.13	-0.0767265	0.0215181	0.103437	0.10845	0.0614576	0.042187	0.211414	-0.108686	-0.0915625	turquoise	PCNXL4
ENSG00000096080.10	0.0408571	0.107883	0.0497621	0.0919604	0.358456	-0.0846697	0.0793085	-0.341524	-0.137682	turquoise	TNFRSF19
ENSG00000096092.5	0.20572	0.144869	0.385463	0.244062	0.538068	-0.209745	0.0710819	-0.493481	-0.339573	turquoise	YWHAH
ENSG00000096384.18	0.00490816	0.207656	0.0415884	0.0541657	0.075054	-0.0520742	0.18773	-0.065196	0.161328	turquoise	GNGT1
ENSG00000096433.9	-0.027025	-0.136582	-0.0429935	-0.0222679	0.00993241	0.257756	0.155003	-0.01947	-0.0759245	brown	PRMT1
ENSG00000096696.12	-0.298842	-0.430453	-0.227561	-0.303996	-0.357237	0.36631	-0.0118781	0.411388	0.105172	blue	ZNFX1
ENSG00000096746.16	0.116629	0.101499	0.173002	0.497425	0.160489	-0.214436	-0.215081	-0.121784	0.0926728	magenta	APIP
ENSG00000097007.16	-0.128079	-0.214139	-0.0775089	-0.00127054	-0.200625	0.115069	-0.0594758	0.194947	0.124237	blue	CCNA2
ENSG00000097096.8	-0.0499736	-0.0363757	-0.064548	-0.143859	-0.379576	-0.00707894	-0.150008	0.342489	0.060439	blue	ALDH18A1
ENSG00000099194.5	0.258919	0.493066	0.0693916	0.208708	0.370538	-0.177217	0.156753	-0.411113	-0.245276	pink	GUF1
ENSG00000099219.12	-0.025647	-0.15924	-0.138921	-0.162969	-0.153411	0.0772123	-0.0777674	0.190196	0.0638361	blue	TAF4B
ENSG00000099246.15	0.128609	0.0897108	0.1232	0.211845	0.401245	-0.0636447	0.0712163	-0.385665	-0.308561	turquoise	MAL2
ENSG00000099250.16	0.236606	0.11611	0.193012	0.127558	0.327231	-0.159913	0.0763821	-0.341396	-0.303153	turquoise	C9orf72
ENSG00000099282.8	-0.227053	-0.0542756	-0.0134207	0.511925	0.150454	0.342625	0.415507	-0.199381	-0.0469532	magenta	INTS4
ENSG00000099290.14	0.199337	0.323681	0.0519837	0.316929	0.0435509	-0.238173	0.00516128	-0.121249	-0.0456629	magenta	HERC4
ENSG00000099622.12	-0.25294	-0.171923	-0.242651	-0.0906334	-0.1726	0.350471	0.231138	0.177077	0.0823967	brown	SOWAHC
ENSG00000099785.9	-0.134205	0.0349419	-0.116295	-0.0717864	-0.212908	0.113185	0.0873806	0.176264	-0.0565986	blue	KTI12
ENSG00000099795.5	-0.135985	0.171366	0.00858446	0.0956762	0.0655051	0.1709	0.397193	-0.115302	-0.0504113	red	TCEA3
ENSG00000099797.10	-0.115828	0.0883582	0.160097	0.184174	0.423744	0.160415	0.472417	-0.475988	-0.333101	turquoise	BMPR2
ENSG00000099817.10	0.0537007	0.253975	0.242943	0.270762	0.60659	-0.0822931	0.38619	-0.584155	-0.144766	turquoise	ZNF248
ENSG00000099821.12	0.00167784	-0.0508977	-0.116065	-0.0112061	-0.222733	0.0587077	0.0475427	0.182467	0.224426	yellow	ENTPD7
ENSG00000099849.13	0.0910388	0.0215202	-0.0683355	-0.0409008	0.147405	0.0544065	0.126088	-0.132615	-0.0405223	turquoise	C16orf74
ENSG00000099875.13	-0.117084	-0.139852	-0.21905	-0.193515	-0.423508	0.124401	-0.135663	0.441121	0.226689	blue	TMEM116
ENSG00000099910.15	-0.196613	-0.107443	-0.282989	-0.106878	-0.0457897	0.324163	0.26913	0.057732	-0.0618443	brown	LYN
ENSG00000099917.16	-0.227141	-0.20386	-0.188458	-0.0630791	0.0258152	0.423269	0.282999	-0.00322233	-0.0232882	brown	CASC19
ENSG00000099956.16	-0.107168	0.0181036	0.120322	0.268359	0.524283	0.226502	0.54961	-0.55475	-0.139914	turquoise	TRAPPC2P1
ENSG00000099974.7	0.11603	0.139491	-0.148001	-0.121308	-0.0490838	-0.100427	-0.108434	0.0636923	-0.0264426	blue	ZNF432
ENSG00000099991.15	-0.28144	-0.13748	-0.113913	-0.119024	-0.20916	0.32076	0.191118	0.204486	0.0746928	brown	SMIM3
ENSG00000099994.10	-0.062539	-0.00734081	-0.0522867	0.186714	-0.00618576	0.293782	0.383652	-0.0696675	-0.134649	brown	HMBS
ENSG00000100023.16	-0.242228	-0.238602	0.0881702	0.04113	0.140362	0.32194	0.344158	-0.192604	-0.197403	brown	BRK1
ENSG00000100029.16	0.129221	0.0480076	-0.00604377	0.00339093	0.176792	-0.0921567	-0.0190228	-0.163728	0.103069	turquoise	SMIM6
ENSG00000100075.8	-0.193256	0.0983414	0.152262	0.227111	0.326694	0.312639	0.665776	-0.4145	-0.202498	red	GUSBP3
ENSG00000100097.10	-0.0221591	0.0143009	-0.0504004	0.0618979	0.161944	0.284017	0.520265	-0.167108	0.000582878	red	FTLP14
ENSG00000100311.15	0.15456	-0.127974	-0.139218	-0.134827	-0.105965	0.0483222	-0.120421	0.137872	0.110249	blue	BOP1
ENSG00000100359.19	-0.229133	-0.0753362	-0.0796409	0.0135511	-0.0322454	0.285449	0.240166	-0.0104519	-0.139647	brown	SMG1P7
ENSG00000100364.17	-0.125294	-0.0261941	-0.0507084	-0.000916437	-0.350711	0.143496	0.0522387	0.307962	0.132987	blue	AGAP12P
ENSG00000100462.14	0.181455	0.0808483	0.231843	0.27509	0.568725	-0.185559	0.123897	-0.550295	-0.149132	turquoise	IL7R
ENSG00000100519.10	0.225263	0.182613	0.393343	0.210611	0.485581	-0.348038	-0.0230793	-0.471013	-0.159956	turquoise	C15orf40
ENSG00000100528.10	0.263813	0.049363	0.178037	0.143017	0.432378	-0.243443	-0.0776164	-0.37724	-0.142583	turquoise	LRRC45
ENSG00000100558.7	0.137241	0.0629067	-0.0091823	0.320643	0.335393	0.0430533	0.274626	-0.36984	-0.188058	turquoise	CHRNB1
ENSG00000100564.7	0.140007	0.0770601	0.218676	0.234152	0.534657	-0.174016	0.110774	-0.500369	-0.283582	turquoise	SLC16A5
ENSG00000100567.11	-0.179968	-0.146948	0.190134	0.138051	0.330428	0.0585363	0.192893	-0.303364	-0.113744	turquoise	PCDH7
ENSG00000100575.12	0.177779	0.0385883	0.121538	-0.0383931	0.0675356	-0.229828	-0.210014	-0.0798907	0.086826	turquoise	TRIM56
ENSG00000100592.14	-0.00265754	0.0374676	0.017366	0.015135	0.0368772	0.133186	0.263687	-0.0440781	-0.00806122	red	REPS2
ENSG00000100596.5	-0.207257	-0.264696	-0.100998	-0.0757441	-0.0853734	0.235345	-0.00631136	0.120871	-0.0639218	blue	KBTBD2
ENSG00000100600.13	-0.0530017	0.00659978	0.163334	0.0134687	0.360206	0.0460617	0.220589	-0.376064	-0.21276	turquoise	KCNG3
ENSG00000100601.8	0.176781	0.167825	0.20364	-0.00975726	0.195191	-0.231211	-0.0911901	-0.184007	-0.219076	turquoise	MINA
ENSG00000100605.15	0.130166	0.047714	-0.0642059	0.0366044	-0.0118495	0.102708	0.112991	-0.0344493	0.154847	yellow	PRKCE
ENSG00000100612.12	0.178381	-0.0966287	-0.0232728	0.0889334	0.356284	-0.160507	-0.145307	-0.247971	-0.0801249	turquoise	TM4SF1
ENSG00000100614.16	0.160521	0.109634	0.144233	-0.045389	-0.0707502	-0.259376	-0.261109	0.079794	0.0235074	green	OTUD3
ENSG00000100632.9	0.0680969	0.0988154	0.164092	-0.0535654	-0.0707145	-0.255615	-0.300491	0.0895684	0.254768	yellow	CRTAP
ENSG00000100644.15	0.304405	0.157641	0.185923	0.129603	0.458749	-0.203265	0.0622728	-0.453684	-0.16552	turquoise	SF3B5
ENSG00000100711.12	0.0449582	0.0877238	0.00672819	0.196971	0.344183	0.128922	0.319067	-0.36101	-0.0890861	turquoise	LRRC8C
ENSG00000100714.14	0.106992	0.075677	0.116417	0.18907	0.217501	-0.04326	0.228214	-0.283542	-0.108377	turquoise	YWHAG
ENSG00000100744.13	0.177172	0.102737	0.136589	0.197402	0.355557	-0.130747	0.107066	-0.360375	-0.234927	turquoise	TMEM37
ENSG00000100749.6	0.0488599	0.0866779	0.440437	0.0172635	0.219776	-0.159579	0.0773909	-0.28921	-0.194872	green	SHCBP1
ENSG00000100764.12	0.302986	0.392393	0.385484	0.37143	0.640055	-0.358463	0.154742	-0.651536	-0.212459	turquoise	HAS2
ENSG00000100804.17	-0.0760951	0.0697182	0.181935	0.209862	0.417503	0.0363515	0.343823	-0.438934	-0.161408	turquoise	DNAJC21
ENSG00000100814.16	0.0254566	-0.240072	-0.0255737	-0.0799676	0.0242754	0.0217505	-0.157146	-0.00721975	0.0994529	turquoise	REEP4
ENSG00000100823.10	0.0920349	0.111072	0.0290371	0.11493	0.419668	-0.0128891	0.244938	-0.403202	0.0160853	turquoise	FEN1
ENSG00000100865.13	0.00986561	-0.0208991	0.0693897	-0.0672811	0.0945341	-0.107052	-0.157735	-0.0564372	-0.0180707	turquoise	TPPP
ENSG00000100883.10	0.0341323	0.055859	0.203527	0.216812	0.48126	-0.218773	0.0457499	-0.42489	-0.242903	turquoise	ATF5
ENSG00000100888.11	-0.0482278	-0.136391	-0.136117	-0.231751	-0.266014	-0.0155183	-0.228933	0.293101	0.17724	blue	TMEM223
ENSG00000100889.10	-0.0973234	-0.208116	-0.118162	-0.103298	-0.107132	0.25841	0.0604749	0.0906538	-0.0119305	brown	STX18
ENSG00000100902.9	-0.124481	-0.194465	-0.199639	-0.083049	0.0151019	0.150216	-0.0850964	0.0690246	0.106546	turquoise	XPO6
ENSG00000100906.9	0.161673	0.0475683	-0.128023	-0.0871953	-0.0596063	-0.0291025	-0.17801	0.0891949	0.0395853	blue	MN1
ENSG00000100911.12	-0.0846749	0.1528	0.132296	0.0631601	0.0748748	0.113121	0.340096	-0.134717	-0.0511729	red	DDX19A
ENSG00000100916.12	0.0959818	0.160425	0.160786	0.0140749	0.145309	-0.238937	-0.0858493	-0.178462	-0.251955	turquoise	NSMCE1
ENSG00000100934.13	0.212652	0.202727	0.336852	0.356606	0.434365	-0.295982	0.105231	-0.456657	-0.284765	turquoise	RAB24
ENSG00000100938.16	-0.0649479	-0.0111125	0.020508	-0.000648079	0.129605	0.0774577	0.14357	-0.133016	-0.0551018	turquoise	RNF181
ENSG00000100979.13	-0.0313842	-0.236936	-0.168783	0.0344233	0.174437	0.246067	0.157073	-0.134454	-0.0377717	turquoise	RNF223
ENSG00000101040.18	-0.19387	-0.148283	-0.101853	-0.0686573	-0.295841	0.15966	-0.0764413	0.262436	0.167245	blue	RPL9P9
ENSG00000101132.8	0.128618	0.153342	0.151622	0.122338	0.121912	-0.224498	-0.110761	-0.0639477	0.170878	turquoise	ADSL
ENSG00000101144.11	-0.218587	-0.1687	-0.208939	-0.188065	-0.350737	0.20826	-0.0718773	0.357331	0.227509	blue	RPS2P5
ENSG00000101146.11	0.0750095	-0.00190551	0.117613	0.104971	0.46129	-0.18826	-0.0568521	-0.411243	-0.153343	turquoise	PPIL3
ENSG00000101150.16	0.166461	0.0838117	0.259245	0.224784	0.557677	-0.16117	0.128356	-0.534279	-0.18428	turquoise	STON1
ENSG00000101161.7	-0.313983	-0.0880805	-0.0321009	0.0224471	-0.0762484	0.250668	0.268488	-0.00398757	0.0708826	brown	MRPS31P5
ENSG00000101166.14	0.345533	0.118881	0.279005	0.122407	0.414446	-0.396221	-0.211597	-0.340432	-0.150119	turquoise	RPL36A
ENSG00000101181.16	-0.199045	-0.0582806	-0.0406138	-0.123633	-0.10243	0.0563177	-0.00765332	0.0745335	0.0580549	blue	PLEKHO2
ENSG00000101191.15	-0.101749	0.0271683	-0.104276	0.0325056	-0.206734	0.0744688	0.00209237	0.170665	0.0351996	blue	MRPL20
ENSG00000101193.7	-0.345676	-0.36548	-0.159212	-0.161772	-0.212202	0.285102	-0.0134231	0.227639	0.0911987	brown	ARPIN
ENSG00000101199.11	-0.145204	-0.13992	-0.17974	-0.161875	-0.28172	0.224413	0.0204399	0.265875	0.104846	blue	DECR2
ENSG00000101216.9	-0.0497466	-0.0156947	-0.092866	-0.197311	-0.225751	0.0836994	-0.0716493	0.223326	0.181403	blue	ZNF702P
ENSG00000101310.13	0.130016	0.099394	0.12392	0.228584	0.417709	-0.116805	0.113888	-0.407507	-0.294328	turquoise	FAAHP1
ENSG00000101350.7	0.0155435	0.0601609	0.0569999	0.0846439	0.195608	-0.0916634	0.0243244	-0.134514	-0.00179688	turquoise	GPX1
ENSG00000101557.13	0.0754922	-0.0167027	0.24442	0.307268	0.225033	-0.104445	0.0406977	-0.234156	-0.0657469	magenta	GM2A
ENSG00000101577.8	-0.0307218	-0.156174	-0.142172	-0.142957	-0.28151	0.0726355	-0.12082	0.270708	0.000812823	blue	MVB12B
ENSG00000101608.11	0.238674	0.134611	0.217631	0.229011	0.443603	-0.0897155	0.220288	-0.416536	-0.316524	turquoise	ADA
ENSG00000101639.17	-0.193074	-0.222245	0.0572288	-0.0284865	-0.127987	0.236029	0.0747412	0.108761	0.010162	brown	SLC6A17
ENSG00000101654.16	-0.0489789	-0.196829	-0.259184	-0.0306483	-0.269348	0.0626517	-0.193389	0.297181	0.116906	blue	SLC25A29
ENSG00000101966.11	-0.00720901	-0.142278	-0.165569	-0.198467	-0.364845	-0.00960802	-0.30912	0.39538	0.256188	blue	HIST1H3C
ENSG00000102144.12	0.00645635	-0.169578	-0.0132516	0.0400002	0.423182	0.0266223	0.0213169	-0.310367	-0.284107	turquoise	HIST1H3G
ENSG00000102158.18	0.0701844	0.103863	0.0945799	0.0463117	0.23432	-0.106763	0.0193869	-0.170256	-0.266943	turquoise	TAF9
ENSG00000102218.5	0.154621	0.0789369	0.226845	-0.0219758	0.231722	-0.26736	-0.145791	-0.259237	-0.282115	turquoise	NBPF10
ENSG00000102471.12	0.177702	-0.00509078	0.203577	0.22919	0.512306	-0.12604	0.0289256	-0.460849	-0.271389	turquoise	FAM234A
ENSG00000102554.12	0.121465	-0.0131092	0.0262565	-0.106408	-0.235169	-0.142878	-0.2812	0.266555	0.267068	blue	ZNF232
ENSG00000102580.13	0.219588	0.124965	0.139035	0.183413	0.227836	-0.286268	-0.15351	-0.186624	-0.16368	turquoise	FTH1
ENSG00000102710.18	-0.0107881	-0.0983558	0.235481	0.105218	0.198013	-0.136763	-0.11092	-0.155341	0.0133997	turquoise	ZNF180
ENSG00000102753.8	0.157634	0.112456	0.16302	0.102206	0.114617	-0.166467	0.0171741	-0.107806	-0.0136954	turquoise	CHAF1A
ENSG00000102763.14	-0.0953274	-0.0476431	-0.143468	-0.0311275	-0.172652	0.13076	0.0696247	0.173294	0.139582	blue	PROCA1
ENSG00000102805.12	0.0994047	0.0820083	-0.0662072	-0.0424385	0.0234361	-0.100405	-0.121628	0.00748911	-0.0803869	turquoise	MGAT5B
ENSG00000102854.13	-0.259416	-0.243727	-0.202112	-0.0921124	-0.227175	0.357285	0.105829	0.23642	-0.0296742	brown	BAIAP2
ENSG00000102858.11	-0.160734	-0.1506	-0.0366619	-0.102151	-0.159923	0.185367	0.0476832	0.126319	-0.0151064	blue	FAM109B
ENSG00000102870.5	0.088998	-0.03933	-0.0766863	-0.133679	-0.0830791	-0.137227	-0.246559	0.14017	0.204207	yellow	MRFAP1
ENSG00000102897.8	0.0884949	0.137835	0.0851067	0.0496737	0.125386	-0.213981	-0.0586894	-0.103696	-0.0280932	turquoise	RIC8A
ENSG00000102898.10	0.0123922	0.149109	0.0421809	0.176995	0.303407	0.0994094	0.284905	-0.287279	-0.164618	turquoise	SCRIB
ENSG00000102921.6	0.0775899	-0.0933111	-0.239907	-0.180122	-0.305178	-0.00176666	-0.252863	0.344593	0.217521	blue	KLHL28
ENSG00000102978.11	0.101159	0.131546	0.166796	0.212439	0.564165	-0.164535	0.127717	-0.517025	-0.265367	turquoise	CRIPAK
ENSG00000103018.15	0.0565902	0.100717	0.26232	0.164531	0.42491	-0.0979784	0.147968	-0.403491	-0.287114	turquoise	ZNF707
ENSG00000103024.6	-0.357102	-0.0891239	-0.149357	0.0082946	-0.137794	0.449352	0.457181	0.0615574	-0.0773551	brown	ATAD5
ENSG00000103145.9	-0.0534494	0.342148	0.0575696	0.0786551	0.246846	0.0796937	0.470695	-0.313891	-0.233628	red	BASP1
ENSG00000103168.15	-0.0333894	-0.0956331	-0.19552	-0.162542	-0.260542	0.0525048	-0.203821	0.257911	0.0650062	blue	UBA7
ENSG00000103197.15	-0.133818	-0.102088	-0.102147	-0.11039	-0.145767	0.162752	0.11599	0.149559	0.0742314	blue	DMRTA1
ENSG00000103199.12	-0.0120909	-0.109526	-0.146533	-0.111946	-0.303091	0.13955	-0.0391511	0.292477	0.0907178	blue	ANO6
ENSG00000103202.11	0.153588	0.405039	0.0733252	0.137714	0.166931	-0.0631703	0.234482	-0.199233	0.108101	pink	ZNF169
ENSG00000103222.17	0.0559257	0.114169	-0.0782739	0.0167598	-0.135418	0.158849	0.110672	0.091234	0.0138106	blue	DNAJC28
ENSG00000103227.17	-0.0771518	-0.0484052	-0.0880811	-0.134892	-0.100283	0.108922	0.139585	0.0701791	-0.0625092	blue	ZNF613
ENSG00000103245.12	-0.2134	-0.161547	-0.177874	-0.021961	-0.0699756	0.226381	0.110526	0.0486617	-0.0782238	red	TUBB6
ENSG00000103248.16	0.0123678	0.0818682	-0.204999	-0.101808	-0.252597	0.0401457	-0.0824885	0.229983	0.037004	blue	SPACA6
ENSG00000103253.16	-0.0723066	0.143971	-0.19147	0.101737	-0.0940931	0.196768	0.248358	0.0388118	0.0885405	brown	DENND2C
ENSG00000103257.7	-0.199702	-0.250262	-0.227506	-0.195673	-0.335764	0.30155	0.00198647	0.340484	0.202657	brown	CLN8
ENSG00000103266.9	0.166692	0.42315	0.0204068	-0.00791716	0.141033	-0.203637	0.0992242	-0.154797	-0.0625038	pink	PLEKHF2
ENSG00000103335.18	-0.241585	-0.0353776	-0.250775	-0.165684	-0.448871	0.451261	0.247328	0.377037	0.0604753	brown	BGN
ENSG00000103356.14	-0.0130257	0.0841279	0.146813	0.217474	0.157221	0.024345	0.244773	-0.197798	-0.0749921	turquoise	ZNF518B
ENSG00000103415.10	0.182278	0.128185	0.000116995	0.288845	0.39804	0.0152851	0.251278	-0.385383	-0.0758737	turquoise	WDR73
ENSG00000103423.12	0.0874399	-0.0704682	-0.023023	0.0890414	0.330196	-0.0137714	0.0960004	-0.31654	-0.135667	turquoise	ZDHHC13
ENSG00000103429.9	0.195388	-0.0100911	0.0395016	-0.00788606	0.167124	-0.119693	-0.0983098	-0.133354	0.0170672	turquoise	PIDD1
ENSG00000103485.16	-0.0351703	0.241717	-0.0131455	0.0804268	0.105123	0.18299	0.419713	-0.162437	-0.00394711	red	ZNF713
ENSG00000103502.12	-0.182482	-0.105667	-0.0126202	-0.118162	-0.193663	0.141041	0.0275394	0.176491	0.0583362	blue	KCTD12
ENSG00000103507.12	0.0869274	0.131123	0.0514293	0.225429	0.460315	0.0125248	0.304572	-0.440336	-0.065855	turquoise	FARSA
ENSG00000103512.13	0.17758	0.310983	0.0570447	-0.00221068	0.0933678	-0.112772	0.0726851	-0.131338	-0.0835529	pink	GSG2
ENSG00000103549.20	0.0260404	-0.0695035	-0.0620672	-0.0739409	0.174585	0.0259144	-0.0322705	-0.138518	-0.0455871	turquoise	AURKB
ENSG00000103550.12	-0.103663	-0.0742262	-0.162329	-0.186857	-0.36781	0.0901882	-0.200435	0.41147	0.258548	blue	AP3S1
ENSG00000103591.11	0.230677	0.119931	0.116678	0.146451	0.352477	-0.270911	-0.0684314	-0.311726	-0.021237	turquoise	ADGRG2
ENSG00000103657.12	-0.108451	-0.174371	-0.322681	-0.107579	-0.195348	0.250034	0.0763338	0.261118	0.171952	blue	THAP2
ENSG00000103671.8	0.0984096	0.0803363	0.0804646	0.0168275	0.145182	-0.113571	0.0112087	-0.174516	-0.12982	turquoise	VEGFB
ENSG00000103811.14	-0.339666	-0.340004	-0.196155	-0.00507325	0.0210877	0.497831	0.290028	-0.0101581	-0.0172719	brown	BRMS1
ENSG00000104067.15	0.00601768	-0.107735	0.160328	0.0132013	-0.0295098	0.0987224	0.181383	0.0249103	-0.0848476	red	CFAP46
ENSG00000104093.12	-0.106353	-0.228807	-0.0562288	-0.108356	-0.154606	0.0568331	-0.0561309	0.176104	0.0975069	blue	TADA2B
ENSG00000104131.11	0.384555	0.20122	0.220153	0.191877	0.210261	-0.373539	-0.244293	-0.17309	0.113583	black	FAM192A
ENSG00000104164.9	-0.0599671	-0.150573	-0.186083	-0.162483	-0.457736	0.0282598	-0.298655	0.465781	0.207028	blue	DMXL1
ENSG00000104267.8	0.227756	0.218326	0.162753	0.0515373	0.373778	-0.302893	-0.099668	-0.357299	-0.19629	turquoise	KIF21A
ENSG00000104343.18	0.164989	0.0629474	0.0985652	0.0606569	0.249781	-0.24346	-0.124584	-0.211611	-0.122213	turquoise	SHROOM3
ENSG00000104413.14	-0.2849	-0.209568	-0.00659252	-0.0659865	-0.169908	0.290372	0.122542	0.122615	0.00258782	brown	TMEM19
ENSG00000104442.8	0.104409	0.0616718	0.136548	-0.00298466	0.042036	-0.216581	-0.176464	-0.0391859	0.0129996	turquoise	HNRNPD
ENSG00000104518.9	-0.195013	-0.121944	0.00914634	-0.0647321	-0.0343982	0.261107	0.206535	-0.0312216	-0.0996467	brown	IQGAP1
ENSG00000104522.14	0.00295751	0.0091696	0.220034	0.207472	0.476662	0.0752895	0.414224	-0.508939	-0.139731	turquoise	PMM2
ENSG00000104524.12	0.0386369	0.0576795	-0.079446	0.0437803	0.0440207	0.0616061	0.0976987	-0.0946211	-0.0127419	turquoise	GLYR1
ENSG00000104529.16	0.181749	0.207535	-0.0143269	0.014093	0.249101	-0.16707	-0.0188943	-0.22225	0.0712612	turquoise	SH3GL3
ENSG00000104549.10	0.236161	0.313667	0.272057	0.201882	0.361033	-0.325191	-0.0404978	-0.394695	-0.164499	turquoise	SLC27A2
ENSG00000104635.12	0.28513	0.0874316	-0.0490072	0.128379	0.156713	-0.0684026	-0.00125144	-0.126334	0.0253245	turquoise	TRIM29
ENSG00000104643.8	0.0161471	-0.123346	-0.0288484	-0.101872	-0.236151	-0.0453833	-0.2673	0.255641	0.0426084	blue	ATAT1
ENSG00000104660.16	0.179311	0.114888	0.159847	0.129077	0.41572	-0.160083	0.0428923	-0.366934	-0.00955577	turquoise	CGREF1
ENSG00000104671.6	0.242401	0.1292	0.150905	0.0701124	0.138202	-0.127501	-0.0459852	-0.169797	0.0751642	turquoise	HADHB
ENSG00000104691.13	0.133738	-0.00566166	0.0634643	0.0124464	0.0589041	-0.163111	-0.199809	-0.0398996	0.23931	turquoise	PNPT1
ENSG00000104714.12	0.00901072	0.0444791	-0.208816	-0.0880331	-0.243595	-0.00722678	-0.110786	0.260204	0.19457	blue	PIM1
ENSG00000104728.14	-0.0564136	0.00736852	-0.0553546	-0.064676	-0.191671	0.0885562	0.0275152	0.221447	0.0787514	blue	TFAP2A
ENSG00000104756.14	0.123481	0.169785	0.325744	0.00633995	0.0152191	-0.196503	-0.11225	-0.0519248	-0.174738	green	PAQR5
ENSG00000104763.16	0.0221653	-0.0491913	-0.0495167	0.0831858	0.301964	0.244931	0.359598	-0.294929	-0.186436	turquoise	CREBZF
ENSG00000104765.13	0.0936733	-0.0151261	-0.100763	0.0080174	0.10077	0.0311503	0.00776718	-0.0652408	0.0286143	turquoise	RMDN3
ENSG00000104783.10	-0.0181298	-0.0999588	0.0933039	-0.01288	0.0588567	0.0925101	-0.0108971	-0.052766	-0.117527	turquoise	GANC
ENSG00000104824.15	-0.202394	-0.288226	-0.140201	-0.303143	-0.612867	0.0519311	-0.391126	0.687365	0.335553	blue	FAM127C
ENSG00000104904.11	-0.120673	-0.041708	-0.121667	0.0265596	0.235511	0.277617	0.510672	-0.216726	-0.0555935	red	FAM109A
ENSG00000104957.12	0.0809555	0.0347604	-0.154963	-0.1505	-0.104592	-0.101066	-0.149898	0.109204	0.0904107	blue	MAFB
ENSG00000104976.10	-0.0877335	-0.155936	-0.0204718	0.0657547	0.111344	0.0606721	0.000461896	-0.11356	-0.0638968	turquoise	INPP5F
ENSG00000104979.7	0.0496981	0.0643502	0.0710054	-0.00935772	0.320901	-0.126383	0.0379223	-0.247803	0.118132	turquoise	CHIC1
ENSG00000105193.7	-0.0634548	-0.03569	-0.277162	-0.15017	-0.394482	0.11706	-0.114925	0.391967	0.647957	yellow	CFAP45
ENSG00000105202.6	0.01672	0.116956	-0.162629	-0.0639712	-0.209363	-0.0396236	-0.0664716	0.213695	0.518652	yellow	ARHGEF35
ENSG00000105220.13	-0.0523644	-0.190681	-0.103782	0.191009	0.315562	0.321568	0.297424	-0.267245	-0.0298269	red	CCDC85C
ENSG00000105245.8	0.0854763	0.0814353	-0.239257	-0.0476854	-0.258497	-0.116029	-0.309875	0.332041	0.169518	blue	SYNJ2BP
ENSG00000105289.13	-0.232877	-0.156913	-0.13308	-0.121882	-0.115056	0.211083	0.00118552	0.120532	-0.0253163	brown	ITGBL1
ENSG00000105355.7	0.044219	-0.0429361	0.172975	0.161961	0.516077	0.0177493	0.229832	-0.472944	-0.227739	turquoise	SLC9A6
ENSG00000105372.5	0.103062	0.318105	-0.0594536	0.00908752	-0.000172075	-0.0877531	0.106041	-0.0257576	0.445668	yellow	NCKIPSD
ENSG00000105373.17	0.254964	0.482687	-0.0784051	-0.058587	-0.215274	-0.360253	-0.302244	0.188285	0.313398	pink	TNFRSF25
ENSG00000105393.14	0.0741146	0.259146	0.221694	0.370375	0.349624	-0.00428922	0.432654	-0.425163	-0.131483	red	HSPA1L
ENSG00000105397.12	-0.225069	-0.135231	-0.20527	-0.14189	-0.380708	0.266543	0.0416525	0.357756	0.0707532	blue	SHISA4
ENSG00000105402.6	0.0391859	0.05243	0.173346	0.111023	0.489478	-0.00378123	0.219441	-0.455069	-0.289167	turquoise	TMEM167B
ENSG00000105404.9	-0.115794	-0.0822238	-0.153424	-0.12736	0.0397304	0.26695	0.275451	-0.0462997	-0.110109	brown	S1PR3
ENSG00000105429.11	-0.225219	-0.0798545	-0.248188	-0.111689	-0.392335	0.252655	0.0561746	0.397657	0.108704	blue	ZNF845
ENSG00000105438.7	-0.11924	-0.0961744	-0.155047	-0.0414051	-0.0696638	0.206282	0.0685643	0.066975	0.181806	yellow	ANKRD18EP
ENSG00000105447.11	0.104361	0.0910891	0.299368	0.0710743	0.355901	-0.174929	-0.029894	-0.348249	-0.0109892	turquoise	TENM3
ENSG00000105576.14	-0.0045294	0.0320191	-0.109546	-0.112276	-0.315328	-0.109461	-0.226257	0.320674	0.183254	blue	C1orf53
ENSG00000105618.12	-0.0898165	0.0918781	0.1243	0.0979539	0.134452	0.157756	0.373784	-0.213588	-0.115198	red	SBDSP1
ENSG00000105619.12	0.0300848	0.287379	0.0183413	-0.0177583	0.0427314	-0.0980456	0.0904624	-0.0546159	-0.0117651	turquoise	MTND2P28
ENSG00000105643.8	-0.0300141	-0.0592757	-0.0858767	-0.191881	-0.294068	-0.0270629	-0.233194	0.310536	0.13673	blue	C6orf15
ENSG00000105669.11	-0.0849379	0.0826024	0.0679508	0.161837	0.496755	0.225571	0.553684	-0.493097	-0.258397	turquoise	AKT1S1
ENSG00000105699.15	-0.0850195	-0.120209	-0.0266073	-0.0990931	-0.00591694	0.169039	-0.00991097	0.0202053	-0.101611	turquoise	CRYZL1
ENSG00000105700.9	0.0546087	0.130635	0.187881	0.212019	0.43927	-0.0947919	0.187883	-0.443691	-0.143428	turquoise	ZNF468
ENSG00000105701.14	-0.186729	-0.150194	-0.171183	-0.0518163	-0.172655	0.24114	0.0446037	0.20663	0.0634973	blue	TRIM39
ENSG00000105810.8	-0.0217146	-0.250057	-0.11379	-0.21689	-0.373308	0.13313	-0.157664	0.411855	0.192426	blue	DHX34
ENSG00000105819.12	-0.0980838	0.0527183	0.156241	0.195817	0.370458	0.131979	0.363277	-0.386011	-0.273056	turquoise	REPS1
ENSG00000105835.10	0.251631	0.154468	0.182048	0.259835	0.393879	-0.203041	-0.00136042	-0.354894	-0.133634	turquoise	CPM
ENSG00000105849.5	0.250047	0.0564207	-0.043856	-0.0949753	0.00155691	-0.197675	-0.189285	0.0381953	0.12858	black	CARD6
ENSG00000105875.12	-0.245813	-0.136383	-0.166887	-0.172534	-0.204791	0.208801	0.0289392	0.211992	0.0950086	blue	IREB2
ENSG00000105889.13	0.147473	0.174487	-0.0424589	0.101851	0.260185	-0.191677	0.0488245	-0.239257	-0.135758	turquoise	TBC1D14
ENSG00000105948.12	0.132964	0.18201	0.180228	0.214059	0.16765	-0.200946	0.00924528	-0.201872	-0.110321	turquoise	RTP4
ENSG00000105953.13	-0.153481	-0.260084	-0.131619	-0.0716527	0.114447	0.383452	0.317343	-0.126858	-0.173099	red	RTN3
ENSG00000105968.17	-0.0980434	0.165252	0.400662	0.0771516	0.0225988	-0.135881	0.0817307	-0.06966	-0.159196	green	MED10
ENSG00000105971.13	0.329369	0.109304	0.209536	0.240273	0.401655	-0.0309841	0.238274	-0.390091	-0.228452	turquoise	SLC19A3
ENSG00000105976.13	0.0584001	0.154987	0.28648	0.0931942	0.116385	-0.0356593	0.19625	-0.148307	-0.23963	green	DNAJB2
ENSG00000106025.7	0.219999	0.309911	0.0511021	0.13762	0.292544	-0.168868	0.0959311	-0.308402	-0.194742	pink	COX5B
ENSG00000106028.9	0.0407342	0.237826	0.0817141	0.135348	0.134081	-0.0928563	0.138965	-0.115066	0.0780538	pink	CCDC115
ENSG00000106049.7	-0.212819	-0.0487882	0.0983799	0.177045	0.341694	0.290324	0.545942	-0.3596	-0.300525	red	PTPRA
ENSG00000106052.12	-0.065609	0.0411365	0.206643	-0.0956897	-0.232847	-0.0637483	-0.056824	0.206445	-0.108955	blue	DAP3
ENSG00000106066.12	0.0857231	0.0751779	0.128745	0.142494	0.387543	-0.0503175	0.164081	-0.356696	-0.225133	turquoise	ARHGEF11
ENSG00000106080.9	0.277167	0.197049	0.0667373	0.093345	0.182212	-0.120823	0.122527	-0.194357	-0.0903275	turquoise	DPH2
ENSG00000106125.14	-0.163398	-0.139873	-0.254548	-0.157401	-0.501221	0.153151	-0.152011	0.442048	0.122583	blue	PPP1R3D
ENSG00000106144.18	0.0694692	0.263971	-0.0590153	0.0210908	0.153306	-0.0790185	0.0694116	-0.148197	-0.100834	turquoise	UGGT1
ENSG00000106153.12	0.00111145	-0.111945	0.132732	0.110259	0.328954	-0.0609913	0.0349759	-0.230472	-0.160856	turquoise	ARNTL
ENSG00000106261.15	-0.217445	-0.0889509	-0.222754	-0.190047	-0.339191	0.201261	-0.0625349	0.381574	0.154058	blue	TRAFD1
ENSG00000106266.7	0.0718557	0.223883	0.0283145	0.157443	0.353149	-0.0596978	0.265967	-0.392311	-0.291546	turquoise	CKMT2
ENSG00000106268.14	-0.156636	0.0122217	0.233095	-0.0860207	-0.0658245	0.110922	0.152721	0.0292111	-0.0284606	green	WDR44
ENSG00000106330.10	0.174687	0.363048	-0.0377478	0.200388	0.228674	-0.157618	0.138023	-0.214825	-0.08312	pink	LCA5
ENSG00000106484.13	-0.0192573	0.0721001	0.176828	0.362518	0.531779	0.129464	0.452231	-0.510555	-0.184485	turquoise	SPDYE1
ENSG00000106541.10	-0.0990204	-0.117757	-0.180779	-0.136196	-0.108461	0.15961	0.0288375	0.116455	0.0408618	blue	RAMP1
ENSG00000106554.10	0.121342	0.175505	0.167243	0.261359	0.452981	-0.184785	0.130674	-0.419999	-0.162599	turquoise	TBRG4
ENSG00000106591.3	0.337861	0.270068	0.0531373	0.0909515	0.314226	-0.24523	-0.00872755	-0.275178	0.0498787	turquoise	GPALPP1
ENSG00000106615.8	0.115147	0.22433	0.493302	0.295492	0.536977	-0.2145	0.186065	-0.536814	-0.395699	turquoise	LMX1B
ENSG00000106617.12	0.199852	0.136011	0.102008	0.14809	0.180996	-0.219758	-0.0542706	-0.195368	0.00769154	turquoise	ARPC5L
ENSG00000106701.10	-0.00615236	-0.0190478	-0.0651942	-0.0675715	-0.127075	-0.123565	-0.318078	0.152988	-0.0471667	blue	GALNT2
ENSG00000106804.7	-0.196445	-0.203047	-0.0985016	-0.13235	-0.133249	0.176176	0.00589478	0.151697	-0.0133345	blue	TMEM177
ENSG00000106853.15	0.0980427	0.0470611	0.215183	0.0790469	0.379227	-0.13024	0.0988877	-0.382186	-0.294005	turquoise	CNIH3
ENSG00000106993.10	0.114811	0.0586687	-0.050117	-0.0465966	-0.162387	-0.142277	-0.282821	0.177682	0.121137	blue	SCRN2
ENSG00000107159.11	0.06593	-0.00400828	-0.119144	-0.0644221	-0.1795	-0.0326501	-0.149679	0.167747	0.0971795	blue	DOPEY2
ENSG00000107164.15	0.201792	0.214909	-0.0252804	0.110612	-0.0737594	-0.279669	-0.173328	0.0830446	0.103056	pink	TIFA
ENSG00000107404.16	0.0505465	0.1089	-0.109425	-0.120874	-0.309931	0.0148087	0.00921229	0.247519	0.203709	blue	DBNDD1
ENSG00000107438.7	-0.14831	-0.330142	-0.205236	-0.0465346	-0.0349725	0.453446	0.238045	0.0420906	0.0146269	brown	KCTD14
ENSG00000107651.11	0.0716587	0.113039	0.101851	0.122694	0.257455	-0.132831	0.0310642	-0.251747	-0.0842021	turquoise	TXNDC11
ENSG00000107672.13	-0.0865272	0.0593927	0.0761958	-0.0874057	0.020991	0.0948406	0.26485	-0.0947245	-0.0465766	red	CAST
ENSG00000107731.11	-0.34452	-0.247653	-0.312026	0.0137817	-0.341258	0.419584	0.0928468	0.327728	0.11656	brown	ST14
ENSG00000107789.14	0.0311082	0.0828097	0.12568	0.191957	0.20698	-0.0401692	0.0457258	-0.226305	-0.171865	turquoise	FREM2
ENSG00000107798.16	0.13818	0.189629	0.189342	0.209217	0.507196	-0.0673824	0.277406	-0.509349	-0.349769	turquoise	SLC7A11
ENSG00000107816.16	-0.125207	-0.128606	-0.219199	-0.0665306	-0.167358	0.21831	0.0416659	0.174665	0.132605	brown	DST
ENSG00000107874.9	-0.200009	-0.300188	-0.0280786	0.0846404	0.12376	0.23115	0.180182	-0.0886652	-0.0354281	turquoise	EPG5
ENSG00000107937.17	0.375434	0.134832	0.125376	0.0890101	0.189626	-0.356354	-0.28477	-0.137822	0.137943	black	C7orf50
ENSG00000107949.15	0.264207	0.298965	-0.0320405	0.0938998	0.201166	-0.256258	-0.0672187	-0.135736	0.18812	turquoise	TRAPPC8
ENSG00000107984.8	0.181812	0.0528098	0.138108	0.485712	0.322283	-0.0462073	0.186312	-0.354769	-0.152689	magenta	EIF4EBP2
ENSG00000108010.10	0.120398	0.178541	0.185544	0.135451	0.372416	-0.137712	0.18483	-0.355263	0.0338697	turquoise	ADPRHL1
ENSG00000108064.9	0.178312	0.208014	0.259904	0.603719	0.225707	-0.428752	-0.255646	-0.21089	0.0226301	magenta	GSTO1
ENSG00000108179.12	0.146436	0.222338	0.165247	0.648775	0.413369	-0.270382	-0.00814438	-0.382101	0.0210306	magenta	N6AMT2
ENSG00000108256.7	0.0443075	-0.0634138	-0.0814578	-0.195508	-0.399929	-0.159513	-0.448377	0.443379	0.193434	blue	F8
ENSG00000108298.8	0.00668817	-0.10878	-0.301216	-0.057942	-0.0374735	0.09795	-0.0302533	0.148317	0.616135	yellow	NTF3
ENSG00000108379.8	0.0894711	0.113908	-0.15016	-0.0833671	-0.062633	-0.0307494	-0.0280447	0.0758439	0.116667	yellow	TMEM216
ENSG00000108384.13	0.0809899	0.0561903	0.509639	0.0307883	0.320476	-0.252462	-0.0144506	-0.34039	-0.250904	green	DCUN1D3
ENSG00000108448.19	0.115984	0.097016	0.160934	0.15854	0.314069	-0.0315217	0.21123	-0.302504	0.0276951	turquoise	TMEM255B
ENSG00000108465.13	-0.183082	-0.146148	-0.0501967	-0.0833777	-0.160247	0.284452	0.217725	0.0908009	-0.151196	brown	SESTD1
ENSG00000108510.8	-0.0403837	-0.152962	-0.0940296	-0.17871	-0.40866	0.0264999	-0.334557	0.436035	0.212406	blue	H2AFX
ENSG00000108518.7	0.160568	0.459392	0.273982	0.158962	0.530246	-0.117284	0.376334	-0.515287	-0.0361418	turquoise	JRKL
ENSG00000108559.10	0.151444	0.116818	0.339259	0.0553183	0.380679	-0.136841	0.0546185	-0.368924	-0.0824227	turquoise	PI4KAP2
ENSG00000108561.7	0.178806	0.160252	0.0803804	0.241964	0.544171	-0.104783	0.201363	-0.455258	0.138666	turquoise	COA5
ENSG00000108604.14	-0.169862	-0.1371	-0.0843798	-0.0440144	-0.272067	0.212157	0.0488654	0.253694	0.179985	blue	LDOC1L
ENSG00000108641.13	0.0156385	0.239343	0.135776	0.164403	0.294822	0.0823913	0.449176	-0.341689	-0.148659	red	SLITRK6
ENSG00000108654.10	0.120417	-0.0821173	0.227586	0.217387	0.536342	-0.0801534	0.0764618	-0.479835	-0.2373	turquoise	UROS
ENSG00000108671.8	0.0300183	0.174926	0.343382	0.303764	0.51792	-0.0235112	0.432886	-0.513483	-0.114026	turquoise	PRPF39
ENSG00000108774.13	0.257053	0.576528	0.0371509	0.164234	0.203725	-0.27448	-0.00367349	-0.20779	0.0411757	pink	ZBTB6
ENSG00000108788.10	0.0597402	0.0532071	-0.0361566	0.0420659	0.288162	-0.00618786	0.062875	-0.26072	-0.0543468	turquoise	SAPCD2
ENSG00000108826.14	0.0476424	0.285701	0.229895	0.147508	0.152204	-0.0908942	0.189908	-0.206685	-0.0460229	turquoise	GABRD
ENSG00000108840.14	-0.19194	-0.225872	-0.163974	-0.140031	-0.190262	0.222956	0.057791	0.158046	-0.0789409	blue	C6orf1
ENSG00000108848.14	-0.094473	-0.0406902	-0.204853	-0.328875	-0.594669	-0.0272925	-0.37369	0.622706	0.29689	blue	CARD9
ENSG00000108946.13	0.107941	0.031225	0.158173	0.318308	0.379701	-0.0648875	0.181911	-0.350862	-0.119443	turquoise	ADAT2
ENSG00000108953.15	0.206125	0.273525	0.256132	0.242883	0.439473	-0.284105	0.0105913	-0.341846	-0.028892	turquoise	RPL35A
ENSG00000108960.6	0.24293	0.146029	0.0559234	0.0463896	-0.0685673	-0.34527	-0.306294	0.0776626	-0.0151421	black	KLHL17
ENSG00000109046.13	-0.272775	-0.327551	0.156737	-0.213323	-0.129427	0.140432	-0.109324	0.130857	-0.160576	blue	FAM110C
ENSG00000109065.10	0.120074	0.0287565	-0.197992	0.0797801	0.0360789	-0.0186165	-0.096678	0.00485872	0.161718	turquoise	S100A13
ENSG00000109107.12	0.0495574	0.1634	0.0217401	0.177464	0.52788	0.0234997	0.32977	-0.497466	-0.26189	turquoise	H1FX
ENSG00000109133.11	0.302805	0.106822	0.266459	0.174272	0.425018	-0.281158	-0.0616227	-0.376959	-0.185931	turquoise	LNPEP
ENSG00000109184.13	0.181487	0.0923501	0.0770001	-0.0129516	0.126043	-0.0961155	0.013405	-0.130681	-0.024019	turquoise	SEC24A
ENSG00000109320.10	0.054201	-0.0576456	0.0800818	-0.0602244	-0.0618184	0.00322308	-0.0720371	0.0483406	0.00736988	green	STAM2
ENSG00000109321.9	0.562864	0.332415	0.0614609	-0.114563	0.1371	-0.363256	-0.221923	-0.182454	-0.0540062	black	COL7A1
ENSG00000109323.7	-0.188591	-0.127006	-0.12051	-0.254639	-0.236635	0.0847391	-0.0851789	0.263568	0.10492	blue	GPD2
ENSG00000109332.18	0.0845086	-0.0995055	0.195506	0.171163	0.325943	-0.106028	-0.0220365	-0.275458	-0.0938554	turquoise	CENPA
ENSG00000109445.9	0.0456181	-0.020338	0.137747	0.294214	0.27611	-0.16607	-0.0658713	-0.254885	-0.0557887	turquoise	DCAF17
ENSG00000109475.15	0.0386305	-0.0991294	-0.312865	-0.0674269	-0.234163	0.0920126	-0.14335	0.289263	0.67092	yellow	RPS15
ENSG00000109501.12	-0.316659	-0.219093	-0.14577	0.0873931	-0.053392	0.463156	0.345297	0.0312927	-0.0410219	brown	CUTA
ENSG00000109519.11	0.295968	0.218129	0.229758	0.259316	0.575558	-0.264496	0.0188955	-0.494454	-0.0551221	turquoise	PTK7
ENSG00000109534.15	0.2687	0.330233	-0.0163666	0.022284	-0.0831231	-0.348913	-0.252556	0.0933913	0.195694	pink	GRB14
ENSG00000109536.10	0.115298	0.0251668	-0.0252743	-0.181166	-0.167275	-0.229821	-0.299012	0.182438	0.0374437	blue	SMG7
ENSG00000109606.11	0.159851	0.15261	0.0828268	0.172088	0.323463	-0.13064	0.00250964	-0.290092	0.0691516	turquoise	BRD8
ENSG00000109738.9	0.0861291	0.087429	-0.0971691	0.110104	0.148452	-0.0596282	0.0650356	-0.164577	-0.161609	turquoise	FARSB
ENSG00000109790.15	0.197919	0.216756	0.105861	0.188129	0.12542	-0.0709445	0.168036	-0.154445	0.0372965	turquoise	CLINT1
ENSG00000109814.10	0.192566	0.14756	0.0968114	0.091167	0.271961	-0.156394	-0.0457546	-0.251216	-0.124915	turquoise	CCNG1
ENSG00000109854.12	-0.0319451	0.00302621	0.0969812	0.26191	0.425328	0.116097	0.400494	-0.417977	-0.24216	turquoise	KCTD18
ENSG00000109881.15	-0.10243	0.163097	0.199067	-0.0682355	-0.257551	-0.195716	-0.239557	0.240113	0.15396	blue	RNF20
ENSG00000109917.9	0.131272	0.130996	0.0841383	-0.0756419	0.147135	-0.218212	-0.124653	-0.109191	-0.0308064	turquoise	TMEM143
ENSG00000109920.11	-0.161567	-0.168355	-0.0687804	-0.149867	-0.31545	0.10951	-0.218097	0.317641	0.235362	blue	PRR14
ENSG00000109929.8	0.33927	0.328196	0.184457	0.151357	0.390259	-0.288637	0.0555624	-0.400667	-0.210436	turquoise	TPCN2
ENSG00000109971.12	-0.059656	0.0708057	0.369372	0.163199	0.369372	-0.15826	0.157208	-0.374047	-0.0374555	turquoise	C1orf123
ENSG00000110013.11	-0.128514	-0.0189704	0.0138937	-0.0107443	0.0133376	0.147478	0.20083	-0.0559418	-0.129533	red	PRKAA2
ENSG00000110042.6	-0.0269969	-0.0831309	-0.246534	-0.134831	-0.172401	0.138028	-0.0859161	0.24785	0.127538	blue	ZFYVE9
ENSG00000110048.10	-0.136496	-0.14833	-0.0886759	-0.106033	-0.30664	0.0578244	-0.137038	0.283072	0.0711455	blue	SMG1
ENSG00000110104.10	0.190657	0.159678	0.120694	0.0493622	0.262338	-0.235481	-0.124351	-0.223256	0.0172734	turquoise	TIMP4
ENSG00000110172.10	0.223568	0.145774	0.279418	0.236814	0.262469	-0.326964	-0.125553	-0.278945	-0.0177913	turquoise	SHKBP1
ENSG00000110195.10	-0.272906	-0.232401	-0.251124	-0.149271	0.0395342	0.408879	0.231542	0.00591849	-0.141882	brown	RSPRY1
ENSG00000110200.7	0.0753604	0.294814	0.140922	0.237636	0.326797	-0.128614	0.192567	-0.330313	-0.0819324	turquoise	MED8
ENSG00000110237.3	-0.196626	-0.0193478	-0.156774	0.00525571	-0.265801	0.288686	0.176167	0.229197	0.0984	blue	ZFYVE28
ENSG00000110274.13	-0.0891458	-0.154389	-0.111152	-0.00322815	-0.220695	0.0669357	-0.099952	0.205808	0.174793	blue	PLCD3
ENSG00000110318.12	-0.225361	-0.184886	-0.0704324	-0.0940563	-0.365754	0.169329	-0.0211351	0.327978	-0.0702231	blue	RUSC1
ENSG00000110321.14	0.198276	0.124899	0.140716	0.129586	0.347952	-0.219794	-0.0409278	-0.278133	-0.0381401	turquoise	GTF3C6
ENSG00000110375.2	-0.321365	-0.296801	-0.115975	-0.120057	-0.118907	0.503718	0.240505	0.128311	-0.0450432	brown	SNRNP25
ENSG00000110400.9	-0.278781	-0.107218	-0.246401	-0.191913	-0.406884	0.273605	-0.0144953	0.429281	0.240974	blue	NXF1
ENSG00000110422.10	0.219294	0.204158	0.15387	0.0972127	0.148786	-0.156765	0.00207934	-0.172187	-0.0814954	turquoise	ADK
ENSG00000110435.10	0.163463	0.0374628	0.174445	0.0372696	0.344072	-0.164658	0.0595186	-0.351743	-0.222271	turquoise	RWDD2B
ENSG00000110442.10	0.0813974	0.121024	0.0445029	0.107521	0.342336	-0.0560461	0.120012	-0.3167	-0.055331	turquoise	TSPAN7
ENSG00000110455.12	-0.214555	-0.118425	0.0124133	0.0330143	-0.125269	0.127892	0.0804146	0.06381	-0.216966	blue	SFR1
ENSG00000110492.14	-0.226304	-0.201041	-0.296962	0.0301344	-0.147296	0.368379	0.0990521	0.168126	-0.0216375	brown	HKDC1
ENSG00000110497.13	0.00333885	-0.102548	-0.109587	-0.101286	-0.0782112	0.025054	-0.129928	0.0925299	0.121793	yellow	HK1
ENSG00000110536.12	-0.0840313	-0.0696316	-0.227876	-0.126433	-0.0928218	0.0374965	-0.1247	0.164431	0.1617	blue	ATAD2
ENSG00000110619.15	0.0947479	0.0612758	-0.0243005	-0.0156239	-0.072742	-0.0460678	-0.0159022	0.032842	0.00218763	turquoise	ATP5G3
ENSG00000110651.10	-0.137009	-0.0307404	-0.313888	-0.226557	-0.437421	0.160431	-0.14353	0.476254	0.310925	blue	TRIM11
ENSG00000110660.13	0.149628	0.0895123	0.0939389	0.102748	0.267583	-0.194907	-0.0567617	-0.253409	-0.0492785	turquoise	LRRC14
ENSG00000110696.8	0.175806	0.0906656	0.0828738	0.097584	0.229444	-0.26059	-0.187923	-0.174077	0.0499495	turquoise	PPM1J
ENSG00000110697.11	-0.252324	-0.0972278	-0.156224	-0.176782	-0.178409	0.287719	0.211721	0.15071	-0.0351394	brown	GART
ENSG00000110717.9	-0.380882	-0.245494	-0.0310578	-0.0426659	0.062526	0.432574	0.474187	-0.0629907	-0.049399	brown	CCDC24
ENSG00000110719.8	-0.155437	-0.0839311	-0.226145	-0.199296	-0.204344	0.219524	0.0538594	0.172735	0.02525	blue	RUNX1
ENSG00000110768.10	0.0830019	0.0537212	0.0593028	0.219885	0.246214	-0.0785739	0.115658	-0.263101	-0.088828	turquoise	ZKSCAN2
ENSG00000110852.4	0.0824247	0.257179	0.0320175	-0.0505724	0.0973198	-0.206952	-0.0711592	-0.0749553	-0.0956927	turquoise	HELQ
ENSG00000110880.9	0.19318	0.038273	0.251193	0.144389	0.427218	-0.267187	-0.0723464	-0.365878	-0.0399553	turquoise	TMEM55B
ENSG00000110955.7	-0.00697607	-0.125255	0.156251	0.103558	0.51308	-0.0204243	0.0974216	-0.426471	-0.108234	turquoise	CAMLG
ENSG00000110958.14	0.0430334	-0.0601005	0.244354	0.177679	0.381322	-0.16077	-0.0670626	-0.290038	0.040098	turquoise	KCNK5
ENSG00000111011.16	0.0926253	-0.00105207	-0.00173972	-0.128133	-0.212398	-0.192059	-0.357968	0.223391	0.17865	blue	LEO1
ENSG00000111110.10	-0.173236	-0.041348	-0.131167	0.0850394	-0.0752773	0.234461	0.150754	0.075413	0.139059	brown	MICALL2
ENSG00000111231.7	0.000665717	0.0573059	0.338564	0.152695	0.397728	-0.135603	0.139302	-0.395034	-0.2702	turquoise	GYLTL1B
ENSG00000111237.17	-0.180882	-0.0319223	0.00982517	-0.0278896	-0.0151797	0.266931	0.306948	-0.00233518	-0.108705	red	TTC7B
ENSG00000111321.9	0.102056	0.0634933	0.00752798	-0.0390236	0.124255	-0.0371773	-0.0762665	-0.0900615	0.0684865	turquoise	HAAO
ENSG00000111348.7	0.12823	0.115137	0.21607	0.287828	0.405465	0.0564601	0.259315	-0.383937	-0.146525	turquoise	AZI2
ENSG00000111412.5	0.0473937	-0.00690245	-0.00487716	-0.0180957	-0.042718	-0.133498	-0.172048	0.0531877	-0.018346	turquoise	DEPDC4
ENSG00000111602.10	-0.223208	-0.0820678	0.203476	-0.0695532	-0.0411125	0.203531	0.181546	0.00118282	-0.0302112	brown	C7orf60
ENSG00000111605.15	0.124983	0.0687557	0.139233	0.0160447	0.295551	-0.185543	-0.0406661	-0.281901	-0.0733915	turquoise	NUDT2
ENSG00000111615.11	0.290799	0.100766	0.139673	0.0246641	0.174663	-0.345421	-0.343387	-0.109749	0.0859098	turquoise	SVEP1
ENSG00000111639.6	0.0735419	0.299148	0.16793	0.111245	0.206856	-0.100502	0.140211	-0.17658	0.0859601	turquoise	CAPN2
ENSG00000111640.13	0.0102649	-0.15595	0.023764	0.195508	0.662895	0.103823	0.202104	-0.554808	-0.241859	turquoise	C1orf145
ENSG00000111642.13	-0.141573	-0.165454	-0.0251704	-0.150664	-0.250604	0.206483	0.125867	0.232619	0.196261	blue	PUS10
ENSG00000111669.13	0.075787	0.207387	0.1579	0.252704	0.636397	-0.0606293	0.319511	-0.601622	-0.317712	turquoise	CLHC1
ENSG00000111678.9	0.138705	0.0562303	-0.172897	-0.192634	-0.159776	-0.199511	-0.372012	0.21698	0.12426	blue	C2orf44
ENSG00000111684.9	0.0307748	0.0875038	0.145197	0.308041	0.59708	0.0710184	0.357541	-0.602365	-0.301409	turquoise	ADCK3
ENSG00000111696.10	0.158785	-0.0106743	0.00965132	0.00394708	0.101059	-0.124778	-0.122231	-0.0731901	0.0840757	turquoise	COMTD1
ENSG00000111711.8	0.248859	0.0956284	0.0564443	0.0985285	0.345852	-0.206431	-0.0914094	-0.288458	-0.23215	turquoise	SGOL2
ENSG00000111716.11	0.161126	0.182412	0.1485	0.232577	0.536599	-0.185209	0.122434	-0.443734	-0.0553262	turquoise	SERPINI1
ENSG00000111775.2	-0.127709	0.0339498	-0.154411	-0.197063	-0.180176	0.0988669	0.0375285	0.209456	0.163675	blue	STXBP4
ENSG00000111786.7	0.192998	0.441592	0.155642	0.162329	0.255897	-0.241454	0.076681	-0.279135	0.0770937	pink	BORCS7
ENSG00000111801.14	-0.155342	0.00540981	-0.0862617	-0.0496866	-0.219588	0.134964	0.0600187	0.202844	0.054499	blue	BBS2
ENSG00000111845.4	0.203658	0.165217	0.190316	0.191454	0.282577	-0.131253	0.123777	-0.294212	0.01426	turquoise	DDX27
ENSG00000111850.9	0.106865	0.195248	0.0566797	0.0800976	0.102288	-0.0697483	0.0637126	-0.120943	0.0124677	turquoise	MBD4
ENSG00000111875.7	0.133303	-0.0350046	0.303079	0.259877	0.379715	-0.118971	0.106029	-0.360941	-0.162669	turquoise	GTPBP3
ENSG00000111911.6	0.109338	0.05399	0.130468	0.0770212	0.0574086	-0.160437	-0.0991489	-0.0781373	0.086241	turquoise	QRSL1
ENSG00000111912.17	0.22377	0.114082	-0.0479233	-0.00372858	0.112351	-0.034127	0.0836406	-0.134751	-0.0350229	turquoise	RTN4IP1
ENSG00000112031.14	0.0837417	0.184312	0.082891	0.0892044	0.0917122	-0.170708	-0.0267952	-0.122076	-0.0916107	turquoise	PPIL4
ENSG00000112033.12	-0.0626382	-0.0840119	-0.121738	0.0126428	-0.102901	0.0593617	-0.0525186	0.123744	0.1683	yellow	EMG1
ENSG00000112079.8	-0.24636	-0.115599	-0.163818	0.0108553	-0.115618	0.256475	0.173991	0.133045	0.0620555	blue	ZBTB1
ENSG00000112167.8	0.039477	0.234405	0.0415413	0.0452184	0.0317259	-0.00202392	0.148902	-0.0752032	-0.105787	turquoise	TIMM8A
ENSG00000112186.10	0.226776	0.15465	-0.0184152	0.0413489	0.0755592	-0.105864	0.0480156	-0.096476	-0.0534997	turquoise	WRNIP1
ENSG00000112200.15	0.177951	0.1043	-0.00569425	-0.0735916	0.101858	-0.231333	-0.237084	-0.00390245	0.0120596	turquoise	KRT17
ENSG00000112208.11	0.223836	0.0789898	0.124058	0.283065	0.461258	-0.0972618	0.23018	-0.435964	-0.071764	turquoise	SPECC1
ENSG00000112237.11	0.16768	0.0220489	0.311126	0.158671	0.397579	-0.108933	0.151395	-0.383129	-0.17311	turquoise	KLK10
ENSG00000112245.8	0.229219	-0.15002	0.163643	0.012775	0.287895	-0.263557	-0.309662	-0.196296	-0.0817059	turquoise	LSM8
ENSG00000112290.11	0.239525	0.236684	0.0362638	-0.00459271	0.17747	-0.237861	-0.094504	-0.140733	-0.0530763	turquoise	TMEM8A
ENSG00000112304.9	-0.042984	0.203116	0.0635693	0.182353	0.303232	0.029776	0.320897	-0.274983	-0.116244	red	HIST1H2BJ
ENSG00000112312.8	0.145978	0.11505	0.15754	0.185498	0.420022	-0.200791	0.0578652	-0.368884	-0.14305	turquoise	TBCC
ENSG00000112335.13	0.0525812	0.156515	0.271427	0.163051	0.395509	-0.158134	0.169043	-0.344218	-0.12138	turquoise	ITFG1
ENSG00000112339.13	0.154036	0.190883	0.142166	0.127208	0.203	-0.191756	0.0320262	-0.197166	-0.00483438	turquoise	OLFM1
ENSG00000112379.8	-0.046872	-0.113049	-0.232424	-0.226918	-0.290626	0.17383	-0.0317601	0.295254	0.120225	blue	TAF4
ENSG00000112406.4	0.00456615	-0.0982142	-0.036999	-0.17875	-0.199365	-0.0653515	-0.262374	0.231367	0.0491879	blue	EXOSC2
ENSG00000112419.13	0.0525463	0.164453	0.0329994	-0.00965234	-0.0163794	0.0127336	0.167613	-0.0416861	-0.0617346	turquoise	TMEM160
ENSG00000112473.15	-0.0761695	-0.132642	0.00210787	-0.0149037	-0.0887281	0.0430958	-0.0365767	0.0665758	-0.0295465	blue	XRCC3
ENSG00000112511.16	0.00591462	0.0525093	0.019038	0.0837954	-0.0149397	0.0190867	0.105792	-0.043325	-0.00779834	turquoise	PRDX5
ENSG00000112514.14	-0.0388451	-0.00956142	0.00268781	0.20384	0.249671	0.102243	0.270185	-0.209135	-0.0745136	turquoise	BCL2L12
ENSG00000112576.11	0.0608801	-0.0353875	-0.14055	0.0138982	0.120695	0.0699721	0.00606004	-0.0538565	0.0317217	turquoise	RAB3IP
ENSG00000112584.12	-0.182772	-0.124177	-0.240651	-0.147076	-0.255558	0.2365	0.0414363	0.267904	0.0362972	blue	GFPT2
ENSG00000112592.11	-0.0326349	0.0265958	0.00322228	-0.158071	-0.115501	-0.0560021	-0.158124	0.130019	0.00440358	blue	PSME3
ENSG00000112624.11	-0.0413137	-0.0401633	-0.0844629	-0.196877	-0.278737	0.0703395	-0.132025	0.303439	0.162763	blue	PIN1
ENSG00000112651.10	0.104495	0.266459	0.218062	0.224705	0.385515	-0.193812	0.147216	-0.394317	-0.0750826	turquoise	SYNGR3
ENSG00000112655.14	-0.219138	-0.233763	-0.192039	-0.0405722	-0.211988	0.429813	0.130675	0.206163	0.0456563	brown	PKMYT1
ENSG00000112658.7	0.284678	0.233433	0.041425	-0.0498014	-0.160329	-0.252055	-0.265602	0.171511	0.167676	blue	WDR24
ENSG00000112659.12	-0.201858	-0.0345929	-0.174076	-0.20669	-0.283778	0.162048	0.0327204	0.263023	0.0799558	blue	FBXL16
ENSG00000112667.11	-0.11392	0.190087	-0.0186736	0.176061	0.0750327	0.253109	0.559892	-0.154036	-0.0638153	red	CHTF18
ENSG00000112679.13	-0.0789829	-0.0614546	-0.211757	-0.0295126	-0.139126	0.135855	0.0978923	0.112596	-0.0146654	brown	MXD4
ENSG00000112695.10	-0.0258237	0.110359	0.122274	0.192817	0.41558	0.0153076	0.297487	-0.363748	-0.0530338	turquoise	GAD1
ENSG00000112697.14	0.255567	0.0596941	0.186563	0.181848	0.472708	-0.158935	0.114291	-0.452395	-0.345645	turquoise	OSGEPL1
ENSG00000112715.19	0.235304	0.240388	-0.0699619	-0.19244	-0.402026	-0.232587	-0.339754	0.376263	0.283481	blue	RNF6
ENSG00000112759.15	-0.143291	0.00587289	0.346693	0.180626	0.377129	0.126835	0.386224	-0.432165	-0.260866	turquoise	SHFM1
ENSG00000112796.8	-0.168444	-0.135556	-0.185394	-0.115524	-0.0195596	0.317183	0.238764	0.0409578	-0.131597	red	MTERF1
ENSG00000112972.13	0.186139	0.305259	0.0693335	0.043183	0.0704321	-0.270619	-0.146969	-0.0282774	-0.0520361	pink	SLC35A3
ENSG00000112992.15	-0.119266	-0.0431245	0.0538037	0.0283215	0.179823	0.166035	0.220626	-0.167578	-0.117547	turquoise	DHDDS
ENSG00000113161.14	0.137863	0.219928	0.182568	0.151318	0.239887	-0.252152	0.0130115	-0.252389	-0.0816667	turquoise	SENP5
ENSG00000113163.14	-0.0868408	-0.165348	-0.232817	-0.210792	-0.20983	0.0661587	-0.137973	0.239755	-0.008968	blue	CCDC92
ENSG00000113300.10	0.113093	0.162518	0.100907	0.031182	0.125829	-0.136758	-0.0358935	-0.106599	-0.135842	turquoise	LPGAT1
ENSG00000113312.9	0.0910603	0.16811	0.0900567	0.0165161	0.0485006	-0.0991018	0.0828635	-0.068322	0.0777055	turquoise	GLIPR2
ENSG00000113328.17	-0.0311205	0.0748189	0.180376	0.0227789	0.118384	0.0389109	0.162511	-0.141006	-0.0177776	turquoise	CNTFR
ENSG00000113356.9	0.204269	0.149657	0.125876	0.090148	0.114449	-0.238154	-0.0495763	-0.110796	0.113091	turquoise	IRF2BPL
ENSG00000113384.12	0.156307	0.241531	-0.0703937	-0.0877434	-0.170357	-0.0153386	-0.0257803	0.151929	0.14275	yellow	KLHL12
ENSG00000113387.10	0.17205	0.193309	0.175713	0.0960735	0.3078	-0.164711	0.0728132	-0.238335	0.0265314	turquoise	RBBP5
ENSG00000113391.15	-0.114495	-0.149604	-0.276097	-0.183945	-0.202722	0.0646112	-0.191586	0.24854	0.016667	blue	MLH3
ENSG00000113407.12	0.132384	0.101154	0.0677865	0.0692099	0.310686	0.030203	0.305882	-0.340332	-0.0597309	turquoise	GBP3
ENSG00000113448.15	-0.0200499	-0.05142	-0.208594	-0.182827	-0.230971	0.0050045	-0.136319	0.276718	0.231311	blue	MREG
ENSG00000113460.11	0.55602	0.360935	0.228835	0.18557	0.330596	-0.489485	-0.170522	-0.287306	0.083245	black	HMGCL
ENSG00000113504.18	0.0319001	0.0606475	-0.126323	-0.107029	-0.206455	0.141534	0.0543955	0.175268	0.162564	blue	PHTF1
ENSG00000113558.17	0.108229	0.126535	0.154243	0.140143	0.362992	-0.222907	0.00850548	-0.301121	-0.204093	turquoise	SMAD9
ENSG00000113575.8	0.180865	0.0660486	0.290971	0.217184	0.397031	-0.255745	-0.0375582	-0.371163	-0.197374	turquoise	HSPH1
ENSG00000113580.13	0.28097	0.0426525	0.0484224	0.0498923	0.121833	-0.212808	-0.117047	-0.0758294	0.00336521	turquoise	POLR3GL
ENSG00000113583.7	0.184547	0.125409	0.223207	0.100713	0.254926	-0.198168	0.0121628	-0.263001	-0.241394	turquoise	UFM1
ENSG00000113594.8	0.405164	0.146852	0.105503	0.121867	0.0198491	-0.237863	-0.0888169	-0.0290772	0.156316	black	BLZF1
ENSG00000113597.16	0.0916391	0.0126957	0.0253896	-0.00588266	0.240586	-0.0721202	0.0355685	-0.203613	-0.0922059	turquoise	FBXO30
ENSG00000113615.11	0.157499	0.121442	0.00373104	0.083723	0.0350726	-0.218492	-0.121189	-0.0156743	-0.0106218	turquoise	FAM53C
ENSG00000113732.7	0.0888666	0.149038	0.00804921	0.0462957	0.255988	-0.0571482	0.178489	-0.245142	0.055429	turquoise	RNF11
ENSG00000113811.9	0.0487264	0.190721	0.338084	0.101023	0.290007	-0.20275	0.0679601	-0.24867	-0.201703	green	ERLIN1
ENSG00000113966.8	0.157299	0.119087	0.163422	0.0228434	0.199619	-0.22434	-0.0485005	-0.216369	-0.124958	turquoise	RPL28
ENSG00000114023.14	0.0482692	0.11242	-0.0453868	0.047078	0.159072	-0.1002	0.0164456	-0.136717	0.0680019	turquoise	RND2
ENSG00000114062.16	0.0339467	-0.0744268	-0.10784	-0.172052	-0.309766	-0.0625115	-0.264059	0.367871	0.206165	blue	SPATA5L1
ENSG00000114127.9	-0.116871	0.0185474	0.00549352	-0.0187689	-0.166423	0.0792606	0.0590434	0.139244	-0.0954899	blue	FOXRED1
ENSG00000114209.13	0.186907	0.158858	0.294853	0.152467	0.386261	-0.279912	-0.0468053	-0.360085	-0.141364	turquoise	CORO1C
ENSG00000114270.14	-0.153795	-0.163786	-0.134355	-0.199977	-0.365364	0.236443	-0.02569	0.345809	0.0534815	blue	C1GALT1
ENSG00000114315.3	0.211113	0.050509	-0.17549	-0.153672	-0.384345	-0.200639	-0.350833	0.403804	0.274441	blue	COX6A1
ENSG00000114354.11	0.104548	0.0139151	0.174	0.154579	0.471288	-0.133024	0.080774	-0.439801	-0.228393	turquoise	RGS9
ENSG00000114391.11	0.00853751	-0.162187	-0.248905	-0.19712	-0.378454	-0.109889	-0.401536	0.478113	0.643567	yellow	DHX40
ENSG00000114395.9	0.089471	0.0767953	0.116086	0.17998	0.32312	0.00692374	0.262754	-0.343405	-0.206827	turquoise	ECM2
ENSG00000114480.11	0.0566475	0.0303784	0.127411	0.168358	0.19095	-0.151186	-0.0525138	-0.222586	-0.21604	turquoise	OBFC1
ENSG00000114491.12	0.166814	0.121724	0.0433008	0.0395182	0.314572	-0.0776787	0.0268098	-0.300198	-0.0998143	turquoise	DHRS7B
ENSG00000114520.9	0.189117	0.232595	0.192595	0.079837	0.232885	-0.249486	-0.0154789	-0.256101	-0.151827	turquoise	TNFAIP1
ENSG00000114554.10	-0.148436	-0.10289	-0.0523858	0.0381689	-0.160207	0.336792	0.196533	0.127529	0.0294691	brown	SUPT6H
ENSG00000114648.10	0.0757579	-0.0784658	-0.0313508	-0.0903437	-0.144185	-0.0985603	-0.27697	0.188081	0.196751	blue	SNX8
ENSG00000114686.7	0.218175	0.116026	0.219733	0.315343	0.497657	-0.166219	0.121324	-0.44222	-0.0260501	turquoise	AADAT
ENSG00000114779.18	-0.166279	-0.0488442	-0.13293	0.163824	-0.0372588	0.278663	0.303435	-0.0255153	0.0937091	brown	KANK1
ENSG00000114790.11	-0.0666117	0.047174	0.0796591	0.0398194	-0.00568817	-0.0662318	-0.0465915	-0.0167625	-0.0559967	turquoise	COMMD9
ENSG00000114854.6	-0.106084	-0.0145662	0.0570371	0.120145	0.146313	0.244744	0.381243	-0.158302	-0.150429	red	RAPGEF1
ENSG00000114857.16	-0.0288368	-0.109029	-0.286122	-0.200245	-0.468339	0.122887	-0.151071	0.494127	0.321727	blue	HOXA1
ENSG00000114978.16	0.0899097	0.0773636	0.237504	0.190164	0.533455	-0.104293	0.145207	-0.496302	-0.298998	turquoise	LMF2
ENSG00000115091.10	0.230135	-0.0113184	0.118361	0.0836977	0.532716	-0.128242	0.0111223	-0.422142	-0.164153	turquoise	STK4
ENSG00000115128.6	0.243857	0.088058	0.0945159	0.311196	0.26218	-0.316539	-0.254579	-0.167733	0.270384	magenta	P3H2
ENSG00000115194.9	-0.150273	-0.189326	-0.00767337	-0.0520047	-0.0455863	0.12845	-0.0294129	0.0402821	-0.0414415	turquoise	NLRP1
ENSG00000115221.9	-0.169691	-0.240532	-0.127836	-0.0963307	-0.150933	0.354564	0.0525976	0.149468	-0.0500231	brown	ANKRD12
ENSG00000115233.10	0.153185	0.112743	0.37965	0.235272	0.573477	-0.245629	0.0735206	-0.531771	-0.315359	turquoise	RIOK3
ENSG00000115282.18	-0.279299	-0.0961256	-0.0449319	-0.121371	-0.132967	0.218893	0.144108	0.0882235	-0.0365159	brown	HMOX1
ENSG00000115306.14	-0.014461	-0.0460047	0.256865	0.029485	0.0425448	0.0189607	0.119766	-0.0623141	-0.0619161	green	ATP5D
ENSG00000115317.10	-0.00720393	0.0359738	-0.104504	-0.103594	0.0944579	-0.06133	-0.0667761	-0.0501823	-0.0479009	turquoise	ARSA
ENSG00000115339.12	0.229327	0.126029	0.0908624	0.102075	0.227735	-0.0499544	0.092328	-0.226749	-0.181364	turquoise	ALG13
ENSG00000115350.10	0.129048	0.326739	-0.0190763	0.0347579	0.029683	-0.231219	-0.0192023	-0.0490364	0.0788086	pink	RBFOX2
ENSG00000115363.12	0.270356	0.28647	0.134612	0.108644	0.106921	-0.247109	-0.0520043	-0.138983	-0.0971852	turquoise	SYNGR1
ENSG00000115364.12	0.160444	0.208455	0.067902	0.130838	0.246122	-0.171056	0.0865504	-0.227187	0.0908644	turquoise	TAB1
ENSG00000115368.8	0.206009	0.189577	0.182118	0.137334	0.147879	-0.313248	-0.0685244	-0.178369	-0.0969653	turquoise	CORO1A
ENSG00000115380.17	0.220396	0.138188	0.257585	0.439004	0.567615	-0.0376305	0.36055	-0.572173	-0.222882	turquoise	POLRMT
ENSG00000115421.11	-0.0457699	-0.195516	-0.048095	-0.0897693	-0.238008	-0.0186429	-0.185165	0.236416	0.101557	blue	MKNK2
ENSG00000115484.13	0.152209	0.144632	0.24367	0.305932	0.581193	-0.2402	0.0903396	-0.509964	-0.05767	turquoise	MMP11
ENSG00000115507.8	0.0549025	0.0199613	-0.124038	-0.0533263	-0.110529	-0.111373	-0.227858	0.176401	0.162126	blue	BCL2L13
ENSG00000115514.10	0.198791	0.130411	0.267749	0.184554	0.392526	-0.232024	0.0353402	-0.397219	-0.0935043	turquoise	HIF1A
ENSG00000115539.12	0.137229	0.189722	0.116336	0.00379808	0.268607	-0.172204	0.0318628	-0.270248	-0.101011	turquoise	ZFYVE21
ENSG00000115541.9	0.206919	0.219176	0.16437	0.161039	0.146006	-0.235993	0.012658	-0.123745	0.171592	turquoise	SLC38A7
ENSG00000115594.10	0.0254409	-0.150861	-0.175011	-0.168116	-0.160507	0.0896485	-0.106029	0.184901	0.0186522	blue	RPS6KA5
ENSG00000115641.17	0.360321	0.0650801	0.0612728	0.226758	0.26195	-0.0739934	0.0884253	-0.282715	-0.0129338	black	PABPN1
ENSG00000115750.15	0.0673882	0.134486	0.147433	0.0901271	0.109887	-0.187759	0.0124761	-0.134927	0.17177	turquoise	FXYD5
ENSG00000115761.14	0.192209	0.199044	0.061221	0.161073	0.313034	-0.220205	0.0135637	-0.268561	0.112858	turquoise	GMIP
ENSG00000115806.11	0.136986	0.110419	0.073084	0.113078	0.335531	-0.172189	0.00468375	-0.320358	-0.151069	turquoise	FMR1
ENSG00000115875.17	0.270831	0.236937	0.0309738	0.246387	0.302838	-0.200817	-0.00265937	-0.280294	0.0192865	turquoise	SEMA4G
ENSG00000115884.9	0.0137094	0.0412264	0.00667726	0.0120449	-0.146513	0.0785625	0.00440436	0.0984197	0.0461565	blue	YPEL3
ENSG00000115902.9	-0.187843	-0.137922	-0.044382	-0.090082	-0.194793	0.193459	0.0286427	0.171511	-0.0752719	blue	RNF215
ENSG00000115942.7	-0.00733936	-0.0762658	0.0896683	0.0922159	-0.0205248	-0.0696915	-0.109404	-0.00891893	0.0314342	turquoise	MLYCD
ENSG00000115944.13	0.0929272	0.130226	0.154263	0.337116	0.381521	-0.0864203	0.175593	-0.356185	-0.0733204	turquoise	HIVEP1
ENSG00000115946.6	0.399105	0.197537	0.236619	0.117386	0.455814	-0.382283	-0.144591	-0.401099	0.0104842	turquoise	PPM1F
ENSG00000115963.12	0.469467	0.101616	0.0133125	0.0714831	0.168613	-0.284687	-0.235141	-0.127647	-0.00479804	black	AHCY
ENSG00000115970.17	-0.163416	-0.191609	-0.0687098	-0.0252914	-0.242888	0.130513	-0.0983324	0.216328	0.119209	blue	EFHC1
ENSG00000116030.15	0.170973	0.147277	0.15827	0.184737	0.395313	-0.219243	-0.0239903	-0.349909	-0.262561	turquoise	NOMO3
ENSG00000116128.8	-0.160056	-0.075754	-0.217564	-0.200745	-0.254467	0.17892	-0.0324067	0.269225	0.115167	blue	LAPTM4A
ENSG00000116161.16	0.265927	0.195331	0.339371	0.234026	0.454915	-0.350252	0.0042792	-0.413243	-0.153448	turquoise	CAPZB
ENSG00000116171.15	-0.00226615	-0.00755709	0.128592	0.186729	0.500249	0.14037	0.387065	-0.458594	-0.209423	turquoise	RAD51
ENSG00000116205.9	-0.152445	-0.155711	0.0816413	-0.231483	-0.17655	-0.0132065	-0.158348	0.145554	-0.0950013	blue	RRP12
ENSG00000116213.14	-0.149632	-0.172635	-0.0277008	0.0239412	-0.0496438	0.280943	0.302754	-0.0180187	0.0605587	brown	ACSM3
ENSG00000116251.8	0.0274109	-0.184355	-0.210709	-0.135872	-0.314619	0.0283448	-0.221982	0.370512	0.700078	yellow	GCFC2
ENSG00000116273.5	-0.078026	-0.0916598	-0.102552	-0.107853	-0.336997	-0.0109282	-0.214682	0.339339	0.142721	blue	ZFX
ENSG00000116285.11	0.41962	0.0952509	-0.0377174	0.0413003	0.2002	-0.0763681	0.00305971	-0.165572	-0.0160927	black	MAP3K14
ENSG00000116288.11	0.0159092	0.167673	0.207362	0.175673	0.291319	-0.000148688	0.406531	-0.322886	0.0167687	red	TMEM98
ENSG00000116455.12	0.180846	0.167347	0.144425	0.194223	0.463265	-0.169516	0.103599	-0.413583	-0.0457943	turquoise	FAM107B
ENSG00000116459.9	0.0197946	-0.0379962	0.141304	0.269046	0.557194	0.068182	0.389975	-0.522198	-0.176129	turquoise	ME1
ENSG00000116478.10	-0.0141033	0.112559	0.172784	0.282535	0.364516	0.0594129	0.376314	-0.411794	-0.174183	turquoise	NCAPH2
ENSG00000116489.11	0.159057	0.0961498	0.379123	0.155942	0.490122	-0.105508	0.217711	-0.459478	-0.323677	turquoise	PDE4A
ENSG00000116497.16	-0.150891	-0.190357	-0.119402	-0.166334	-0.167779	0.101934	-0.0742507	0.186511	-0.00579842	blue	AGPAT4
ENSG00000116521.9	0.043668	0.0869039	0.14781	0.13904	0.406914	-0.0271518	0.312588	-0.417789	-0.178143	turquoise	DERL2
ENSG00000116539.9	-0.135263	-0.138879	-0.0587209	-0.276601	-0.364094	0.029322	-0.167577	0.386751	0.15303	blue	SCARB1
ENSG00000116580.17	-0.153532	-0.0447782	-0.0910224	-0.168037	-0.302357	0.128064	-0.0844692	0.268423	0.0672613	blue	LLGL2
ENSG00000116584.16	-0.0052885	-0.102073	-0.20717	-0.15463	-0.156566	-0.0150491	-0.24006	0.217694	0.143547	blue	NLE1
ENSG00000116661.9	0.0107207	0.423677	0.0133976	0.216592	-0.00611327	-0.0077299	0.28478	-0.0586347	0.148453	pink	PNPLA4
ENSG00000116667.11	-0.0503986	-0.0420806	-0.205679	-0.122256	-0.148166	-0.000233068	-0.135404	0.201523	0.0883175	blue	UBE2D4
ENSG00000116679.14	-0.274878	-0.217047	-0.18152	0.0215821	-0.107447	0.382221	0.283741	0.074298	-0.132437	brown	TNS1
ENSG00000116717.10	0.474109	0.25862	-0.0435771	-0.0242214	-0.144461	-0.285389	-0.217995	0.108977	0.109301	black	MRPL43
ENSG00000116741.7	0.31007	0.264197	0.114483	0.120581	0.280114	-0.288069	-0.000932029	-0.293806	-0.126163	turquoise	CEACAM1
ENSG00000116750.12	0.103546	0.0438656	0.373393	0.338961	0.343651	-0.188297	0.112284	-0.338859	-0.0716	turquoise	SENP1
ENSG00000116752.5	0.267707	0.119896	0.371056	0.073079	0.316627	-0.428692	-0.219918	-0.306112	-0.20177	green	EML1
ENSG00000116786.10	-0.232029	-0.191603	0.0178643	-0.155932	-0.22362	0.252291	0.165704	0.181977	-0.0586549	blue	JARID2
ENSG00000116791.12	0.131529	0.0632638	0.107123	0.188863	0.250182	-0.066516	0.110102	-0.247449	-0.043289	turquoise	PRDM1
ENSG00000116815.14	0.00407709	-0.00863936	0.225454	0.0980004	0.315188	-0.0219947	0.141445	-0.338719	-0.244737	turquoise	MYO9A
ENSG00000116857.15	-0.117903	0.189344	-0.0691038	0.0534612	0.214821	0.202308	0.390678	-0.243746	-0.100261	turquoise	RIF1
ENSG00000116906.10	-0.131408	0.0273128	0.0431099	0.150174	0.118201	0.12687	0.349305	-0.197305	-0.198302	red	SH3BP2
ENSG00000116918.12	0.129692	0.215522	0.145578	0.264364	0.170057	-0.351845	-0.0860077	-0.157832	-0.0331299	magenta	C14orf166
ENSG00000116922.13	0.0813521	0.00248244	0.113384	-0.126237	0.119993	-0.155594	-0.138071	-0.0980243	-0.0150837	turquoise	SLC4A7
ENSG00000116957.11	0.0820248	0.0419929	0.069289	0.205491	0.212854	-0.0369253	0.190151	-0.242432	-0.089508	turquoise	ALG6
ENSG00000116984.11	-0.104329	-0.135145	-0.048612	-0.0358513	-0.0479297	0.0114743	-0.00464963	0.0839731	0.0482215	blue	TPX2
ENSG00000117000.8	-0.0778078	-0.184869	-0.0759519	-0.0303349	-0.191619	-0.0879192	-0.314345	0.246621	0.0612519	blue	NSUN2
ENSG00000117010.14	0.120515	0.0531299	0.166252	0.0242841	0.0163084	-0.252998	-0.230277	-0.0268116	-0.0301375	green	MAT2B
ENSG00000117020.15	0.137526	0.070077	0.0415317	-0.0506516	-0.101325	-0.047176	-0.0134633	0.0691384	0.0794901	yellow	COQ9
ENSG00000117054.12	0.0717875	0.130356	0.279486	0.129562	0.286013	-0.0824498	0.208838	-0.35766	-0.330578	turquoise	TMCC3
ENSG00000117118.8	0.0407332	0.115427	0.207813	0.331564	0.536546	-0.0161452	0.395674	-0.522099	-0.126717	turquoise	HEATR5B
ENSG00000117133.9	0.108852	0.125784	0.174572	0.0871181	0.25632	-0.282129	-0.0893619	-0.238962	-0.0823278	turquoise	ATP2B4
ENSG00000117139.15	-0.104194	-0.161312	-0.071893	-0.122853	-0.194785	0.159187	-0.0144534	0.232931	0.152314	blue	DLGAP4
ENSG00000117143.12	0.54103	0.314182	0.173116	0.166962	0.431203	-0.361784	-0.00653491	-0.412943	-0.0515403	black	BCAP29
ENSG00000117153.14	-0.22983	-0.0141528	0.108968	0.0501529	0.150514	0.184122	0.398374	-0.213112	-0.174553	red	CXCL2
ENSG00000117155.15	-0.0785624	0.0112207	0.177096	0.176304	0.13787	-0.0397991	0.126767	-0.172964	-0.140858	turquoise	NDC1
ENSG00000117262.17	0.19168	0.446286	0.113585	0.0537968	0.12511	-0.307894	-0.009693	-0.17955	-0.127349	pink	HYAL2
ENSG00000117308.13	-0.0214351	0.0411233	0.0427157	0.172032	0.381656	0.162998	0.470943	-0.428407	-0.229643	turquoise	RABGAP1
ENSG00000117318.8	0.0253905	-0.114298	-0.245342	-0.124873	-0.0273565	0.034337	-0.139666	0.115448	0.0178697	blue	SYT7
ENSG00000117335.17	0.03354	-0.00906377	0.0408482	0.155279	0.383203	0.0793541	0.253668	-0.374074	-0.333797	turquoise	GRHL2
ENSG00000117394.18	0.209329	-0.0144622	-0.0875076	0.0644179	0.340957	-0.0283203	0.0224224	-0.289613	-0.0398694	turquoise	PSMA4
ENSG00000117395.9	0.259169	0.159219	0.0622244	0.176542	0.218782	-0.219914	-0.0294536	-0.170846	0.330454	turquoise	PARP3
ENSG00000117419.13	-0.0069789	0.133268	0.218804	0.24246	0.371395	-0.0157549	0.293097	-0.380574	-0.131482	turquoise	CNTLN
ENSG00000117448.12	0.0639432	0.0276842	0.143775	0.247411	0.409839	0.0703594	0.31239	-0.428734	-0.175211	turquoise	C12orf4
ENSG00000117475.12	0.190595	0.0850597	0.073302	0.131771	0.2581	-0.0856486	0.0391688	-0.272078	-0.211084	turquoise	MCAM
ENSG00000117500.11	0.230059	0.0323996	0.301954	0.135885	0.386425	-0.239885	-0.0532735	-0.353892	-0.169526	turquoise	APPBP2
ENSG00000117519.14	0.230298	0.154867	0.303485	0.223236	0.549608	-0.215953	0.116328	-0.549269	-0.35102	turquoise	RNF4
ENSG00000117523.14	-0.111501	-0.0541015	-0.21827	-0.191536	-0.492797	0.166593	-0.0773743	0.485208	0.340327	blue	DGKD
ENSG00000117525.12	0.566792	0.244446	0.215504	0.177696	0.28204	-0.299223	-0.0798063	-0.275488	-0.0353944	black	GPC1
ENSG00000117528.10	0.0812883	0.00162111	0.0716281	0.0747278	0.206578	-0.176075	-0.102992	-0.191224	0.0292012	turquoise	MTMR1
ENSG00000117533.13	0.115613	0.0774332	0.0911324	0.009516	0.0680513	-0.16123	-0.0425713	-0.0857723	-0.0868483	turquoise	TOP2B
ENSG00000117569.17	0.0644	-0.106024	-0.147125	-0.0988102	-0.28087	-0.1416	-0.310361	0.310641	0.0828805	blue	TM7SF3
ENSG00000117592.8	-0.21636	-0.198627	-0.115412	-0.0422899	-0.0856845	0.42717	0.372244	0.0815732	0.0946252	brown	GTF3C1
ENSG00000117593.9	0.0722098	0.0527276	0.296368	0.176925	0.304636	-0.0295126	0.277557	-0.350914	-0.139454	turquoise	SNRPA
ENSG00000117595.9	-0.246286	-0.280943	-0.128463	-0.229302	-0.143617	0.351536	0.0585832	0.162406	-0.014256	brown	PIBF1
ENSG00000117676.12	-0.299945	-0.088806	0.0468137	0.034106	-0.0717104	0.234576	0.198806	0.0411282	0.026091	brown	GPRC5A
ENSG00000117748.8	-0.0899463	-0.0199596	0.258505	0.116788	0.297931	-0.021624	0.194245	-0.355941	-0.281557	turquoise	WWTR1
ENSG00000117859.17	0.00989527	-0.0130054	0.14765	0.249865	0.302937	-0.0457989	0.216317	-0.330593	-0.162146	turquoise	PPP1R3F
ENSG00000117862.10	-0.0412509	-0.00433362	0.108642	0.109323	0.282922	0.0213306	0.126738	-0.314931	-0.146341	turquoise	JKAMP
ENSG00000117877.9	0.060681	0.0151889	-0.109796	0.0701875	-0.0989815	-0.110924	-0.15596	0.151268	0.148694	blue	ZSWIM8
ENSG00000117899.9	0.0114664	0.209167	0.00302252	-0.000595134	0.00908443	-0.0511225	0.101518	-0.0389103	-0.015952	turquoise	DENND6A
ENSG00000117906.12	0.121505	-0.0232274	0.0546695	0.0423918	0.252724	-0.160506	-0.107133	-0.156148	-0.063044	turquoise	PELI3
ENSG00000117984.11	-0.162677	0.0619729	-0.20166	-0.112181	-0.0810546	0.367077	0.265844	0.0396166	-0.0921225	brown	TNIK
ENSG00000118007.11	0.100989	0.0419702	0.108133	0.0755684	0.0624672	-0.267361	-0.219759	-0.031546	0.0977021	turquoise	UGDH
ENSG00000118058.19	-0.147449	-0.137917	-0.041699	-0.16797	-0.367111	0.0916448	-0.117908	0.353319	0.173061	blue	ALOX15
ENSG00000118181.9	0.0718519	0.141974	-0.127859	-0.00735401	-0.0597177	0.0665825	0.11328	0.0834809	0.547892	yellow	JMJD8
ENSG00000118197.12	-0.280116	-0.172902	0.0258907	-0.139924	-0.111028	0.17012	0.126723	0.0472514	-0.129128	red	KEAP1
ENSG00000118246.12	0.0331845	0.111249	0.0877258	0.0984893	0.111931	-0.0944781	0.102012	-0.157529	-0.028428	turquoise	ZNF174
ENSG00000118363.10	0.166183	0.221572	0.180105	0.113344	0.189778	-0.243693	-0.0452592	-0.159605	-0.184589	turquoise	CALM3
ENSG00000118402.5	0.139229	0.115583	-0.0112638	0.114385	0.158712	-0.183778	-0.102391	-0.153697	-0.115254	turquoise	MYO5C
ENSG00000118418.13	0.163451	0.176218	0.0205734	0.21631	0.209743	-0.0445625	0.0996416	-0.208234	0.119228	turquoise	PSMG2
ENSG00000118482.10	-0.167284	-0.146223	-0.225455	-0.097387	-0.263371	0.0689844	-0.126912	0.298609	0.146572	blue	CDHR3
ENSG00000118496.4	0.163977	-0.0128184	-0.00483303	0.00675213	0.0138723	-0.175713	-0.191165	0.0138961	0.185498	yellow	ATPIF1
ENSG00000118503.13	0.292687	-0.0780057	0.046826	-0.058434	-0.057143	-0.181219	-0.313762	0.062522	-0.0579178	black	MNX1
ENSG00000118515.10	0.139195	-0.035386	0.0930266	0.0100454	0.0355145	-0.203013	-0.250568	-0.00787886	-0.120513	turquoise	CRB3
ENSG00000118523.5	0.426482	0.17883	-0.0287916	0.204783	0.17942	-0.226012	-0.0919329	-0.173574	0.043419	black	SCO2
ENSG00000118579.10	0.275537	0.204245	0.0532311	0.0199231	0.219493	-0.141242	-0.0264371	-0.197654	0.0742416	turquoise	CEP72
ENSG00000118620.11	-0.0543777	-0.155281	-0.0179472	-0.203475	-0.218065	-0.0467564	-0.294202	0.244502	-0.003223	blue	ARHGEF34P
ENSG00000118777.9	0.166843	0.159694	0.0578141	-0.115902	0.19304	-0.0910177	0.0833926	-0.22679	-0.0850027	turquoise	SPCS1
ENSG00000118855.17	-0.00402699	0.0476028	0.0839592	0.183092	0.241057	0.0340269	0.238387	-0.265172	-0.230838	turquoise	CHKA
ENSG00000118898.14	-0.393244	-0.321272	-0.26607	-0.0114504	-0.238778	0.599551	0.3941	0.207367	0.0520346	brown	RPS6KA3
ENSG00000118985.13	0.446461	0.169389	-0.0890892	0.00535888	0.0596802	-0.305852	-0.282595	0.017455	0.230391	black	ALDH6A1
ENSG00000119242.7	-0.106216	0.138657	-0.104738	-0.0343912	-0.25751	0.022622	0.0681955	0.224694	0.127908	blue	ZNF592
ENSG00000119335.15	0.159088	0.321068	0.176136	0.24888	-0.0701891	-0.405091	-0.254159	0.069713	0.190336	magenta	EIF2A
ENSG00000119403.12	0.112355	0.249525	0.507662	0.089747	0.332796	-0.178765	0.147576	-0.397245	-0.156094	green	THNSL2
ENSG00000119414.10	-0.0682034	-0.153534	-0.0287137	-0.047888	0.0769806	-0.0545173	-0.134677	-0.0296085	0.0485505	turquoise	ABCA12
ENSG00000119421.6	0.0615505	0.238949	0.178151	0.185671	0.445697	-0.100569	0.193938	-0.41517	-0.193324	turquoise	UBXN4
ENSG00000119616.10	0.242191	0.251903	-0.0496469	-0.152342	-0.0927144	-0.294926	-0.277104	0.139567	0.191987	yellow	SMAGP
ENSG00000119632.3	-0.106631	0.118327	-0.091466	-0.00753608	-0.0653125	0.139081	0.191573	0.0388137	-0.0390842	red	NAIF1
ENSG00000119655.7	0.00630914	0.102605	-0.00855832	0.15282	0.327875	-0.062056	0.0868955	-0.296525	-0.15173	turquoise	ELOVL6
ENSG00000119681.10	0.110345	-0.0112444	-0.123876	0.0161901	-0.116433	-0.0560025	-0.0989723	0.147662	0.119277	blue	TMC7
ENSG00000119685.18	-0.15097	-0.237479	-0.0849186	-0.128043	-0.121702	0.160508	-0.0222307	0.129062	-0.0964138	blue	TRABD
ENSG00000119688.19	-0.0647107	-0.102499	-0.0788396	-0.109347	-0.0930466	0.126943	0.0506531	0.102361	-0.0376165	blue	PA2G4
ENSG00000119711.11	-0.200917	-0.223184	-0.185764	-0.0593572	-0.208539	0.146886	-0.062613	0.229682	-0.0493592	blue	NPAS2
ENSG00000119718.9	0.121155	-0.0187897	0.0899016	0.082668	0.301466	-0.112942	-0.0378272	-0.233801	-0.0938586	turquoise	STAT2
ENSG00000119729.9	-0.118507	-0.0611731	-0.202687	-0.153697	-0.330274	0.105426	-0.0942112	0.380116	0.148348	blue	SYDE2
ENSG00000119772.15	0.0652971	0.182912	0.0269971	-0.0821137	-0.130766	0.0320305	0.0955762	0.0566974	0.104285	yellow	GLG1
ENSG00000119778.13	-0.149924	-0.307522	-0.116175	-0.225328	-0.36441	0.145142	-0.211756	0.364296	0.234489	blue	IRAK3
ENSG00000119900.7	-0.0211879	-0.132891	-0.177416	-0.155027	-0.317946	0.00109637	-0.216677	0.374014	0.199929	blue	MKLN1
ENSG00000119950.19	-0.0542987	-0.118278	-0.203637	-0.185169	-0.291114	0.000930021	-0.264023	0.323888	0.0892354	blue	TRIM36
ENSG00000119965.11	0.18753	0.132763	0.130268	0.106912	0.128072	-0.281676	-0.157334	-0.110354	-0.0205833	turquoise	SMARCA5
ENSG00000120053.10	0.238598	0.115621	0.435483	0.0228678	0.347191	-0.18804	0.0621542	-0.401725	-0.243016	green	ASAP2
ENSG00000120071.11	-0.194162	-0.252583	-0.188435	-0.166898	-0.387445	0.128571	-0.235446	0.438886	0.168678	blue	ZDHHC17
ENSG00000120129.5	0.5956	0.290499	-0.0930042	0.160815	0.302814	-0.314535	-0.115084	-0.235253	0.162558	black	DDX54
ENSG00000120159.10	0.142064	0.115705	0.0149158	-0.0162291	0.101629	-0.192082	-0.0785474	-0.0971538	0.00819215	turquoise	FOXK2
ENSG00000120253.12	0.0228004	0.102978	0.294884	0.0723106	0.170639	-0.0509336	0.103782	-0.237262	-0.188608	green	DKC1
ENSG00000120265.15	0.133567	0.0969416	0.238582	0.161286	0.418919	-0.0902221	0.190831	-0.397736	-0.175438	turquoise	PLXNA3
ENSG00000120333.4	-0.160495	0.117408	0.0557913	0.165668	0.187995	0.114617	0.416658	-0.189442	-0.131839	red	GPR137B
ENSG00000120437.8	0.154771	0.274079	0.385875	0.247455	0.544897	-0.248218	0.209977	-0.568586	-0.235308	turquoise	F12
ENSG00000120438.10	0.190298	0.0870538	0.246178	0.124174	0.406706	-0.234574	0.0196179	-0.33319	-0.0328857	turquoise	PRR7
ENSG00000120458.8	-0.129644	-0.116045	-0.168351	-0.106497	-0.380927	0.146171	-0.0446509	0.360587	-0.00496826	blue	GMEB1
ENSG00000120526.9	0.199728	0.0869662	0.231165	0.100711	0.314003	-0.30733	-0.181312	-0.277987	-0.00749393	turquoise	MBNL2
ENSG00000120549.14	-0.282695	-0.245931	0.00207662	-0.0653379	-0.148256	0.319852	0.120559	0.119692	-0.159855	brown	PLPP5
ENSG00000120616.14	0.0802941	-0.0454553	-0.198831	-0.225723	-0.219637	-0.0946953	-0.345991	0.287835	0.22444	blue	PLIN2
ENSG00000120686.10	0.126098	0.060501	0.158967	0.225729	0.272027	-0.148803	-0.0298609	-0.251434	-0.122445	turquoise	ZNF646
ENSG00000120690.12	0.0618887	-0.0368338	0.0671774	-0.0338611	-0.0219204	-0.150711	-0.25583	0.0375081	-0.0380726	turquoise	MVD
ENSG00000120697.7	0.107004	0.0556784	0.083285	0.0799771	0.25582	-0.131402	-0.033665	-0.244918	-0.0752486	turquoise	IRGQ
ENSG00000120699.11	0.135133	0.138553	0.495228	0.243156	0.368581	-0.239361	0.101685	-0.409307	-0.247943	green	ZNF226
ENSG00000120705.11	0.315034	0.108927	0.115363	0.0727425	0.271765	-0.371073	-0.206985	-0.20599	0.0532672	turquoise	UBIAD1
ENSG00000120738.7	0.341881	0.26512	-0.112791	0.0270955	-0.041032	-0.0915939	0.0187505	0.0393236	0.126167	black	RNF170
ENSG00000120756.11	0.0793588	0.0830316	0.185361	0.232977	0.336407	-0.173409	0.113795	-0.340215	-0.168847	turquoise	ST3GAL4
ENSG00000120800.4	0.132255	0.0279133	-0.136803	0.0535108	-0.0796696	-0.131239	-0.220086	0.157387	0.292256	yellow	TMEM63C
ENSG00000120833.12	0.182649	0.0118915	-0.151779	-0.0278738	-0.042432	-0.0980053	-0.171381	0.0613966	0.0466283	black	HECTD2
ENSG00000120875.7	0.572273	0.270875	0.00729914	0.0425662	0.205211	-0.326283	-0.151178	-0.177999	0.143783	black	IFT172
ENSG00000120885.18	-0.2508	-0.348499	-0.143517	-0.162364	-0.0433229	0.359175	0.183131	0.0446929	-0.203756	brown	STRA6
ENSG00000120896.12	0.149202	0.143496	-0.0963936	0.028663	0.00913494	-0.0194844	-0.0446981	0.0420515	0.188613	yellow	RDX
ENSG00000120899.16	-0.11388	-0.188527	-0.247098	-0.133781	-0.149006	0.30334	0.058598	0.14949	0.169668	brown	ADAM10
ENSG00000120915.12	-0.168267	-0.0686251	-0.128958	0.0293211	-0.0592101	0.250065	0.175687	0.0556722	-0.0432984	brown	DUOX1
ENSG00000120992.16	0.179276	-0.0651952	0.100056	0.316743	0.413831	-0.0666971	0.0829576	-0.374799	-0.130185	turquoise	SLC35A5
ENSG00000121274.11	0.0400293	0.0719675	0.0754817	-0.108615	-0.148029	-0.189041	-0.268229	0.187678	0.131329	blue	C14orf28
ENSG00000121310.15	-0.25608	-0.189777	-0.125163	-0.13059	-0.328253	0.239154	0.0305589	0.289339	0.0549436	brown	HOMER3
ENSG00000121316.9	-0.0512338	0.00477861	0.104155	0.112339	0.276393	0.135887	0.228872	-0.276431	-0.20327	turquoise	SSR2
ENSG00000121481.9	0.183661	0.0898968	0.171176	0.138491	0.2433	-0.19688	-0.0377395	-0.235128	-0.0524178	turquoise	OSBPL6
ENSG00000121578.11	0.324635	0.0640087	0.136173	0.0971112	0.309787	-0.191957	-0.140766	-0.276778	-0.0954777	turquoise	UTP6
ENSG00000121579.11	0.317741	0.206614	0.282619	0.130952	0.306269	-0.461816	-0.218191	-0.264165	-0.00918389	turquoise	MED31
ENSG00000121680.14	-0.0311415	0.0214935	-0.0558393	0.0957025	0.115054	-0.0714227	0.0271012	-0.0778274	0.0611417	turquoise	FAM122C
ENSG00000121864.8	0.147804	0.073548	-0.0152009	-0.0223037	-0.146761	-0.194628	-0.248892	0.179595	0.158893	blue	PARP11
ENSG00000121957.11	0.0909635	0.187673	0.492273	0.105507	0.085973	-0.307486	-0.141931	-0.149264	-0.0531549	green	ANKS1A
ENSG00000121989.13	0.113359	-0.0409283	-0.0868106	-0.158997	-0.129506	-0.111975	-0.27934	0.154956	0.153284	blue	TTI1
ENSG00000122034.11	0.0235733	0.0815871	0.313185	0.276559	0.425657	-0.0721673	0.205512	-0.399002	0.0105707	turquoise	TRUB2
ENSG00000122085.15	0.0878222	0.0784804	0.0479992	0.015844	0.160446	-0.116831	0.0139262	-0.127794	-0.00307503	turquoise	LIN7B
ENSG00000122378.12	-0.0571213	0.112562	-0.0268079	0.521081	0.181813	0.114157	0.305584	-0.220562	-0.0957428	magenta	PRSS23
ENSG00000122417.14	-0.00126683	-0.22101	-0.0254751	-0.170829	-0.396199	0.00441433	-0.225842	0.366463	0.214847	blue	CTDP1
ENSG00000122484.8	-0.0096331	-0.105193	-0.00361492	-0.214003	-0.201235	-0.14165	-0.309895	0.258497	0.106007	blue	CS
ENSG00000122545.16	0.106692	0.160281	0.36325	0.069565	0.0825957	-0.3566	-0.125901	-0.095213	-0.175479	green	CDK8
ENSG00000122550.16	-0.0201983	-0.00384687	0.101385	0.243725	0.405455	0.0457744	0.248918	-0.381082	-0.211117	turquoise	FIGNL1
ENSG00000122641.9	0.199729	-0.157551	-0.142533	-0.0446013	-0.188766	-0.0846913	-0.178406	0.182724	0.109868	blue	EPSTI1
ENSG00000122642.9	0.0297605	0.189174	0.105648	0.0233966	0.266136	0.0942561	0.331522	-0.281723	-0.40268	turquoise	FBXO44
ENSG00000122644.11	0.25479	0.299884	0.532651	0.147645	0.27547	-0.343473	0.0450116	-0.347619	-0.259326	green	EFR3A
ENSG00000122674.10	-0.0688816	-0.0128412	-0.282985	-0.126824	-0.493051	0.0663272	-0.204073	0.48208	0.0967534	blue	ABHD12B
ENSG00000122692.8	0.0573156	-0.111315	0.0279088	0.142699	0.208802	-0.0356957	-0.0484911	-0.201245	-0.106325	turquoise	ZCCHC2
ENSG00000122705.15	-0.0866184	-0.148257	-0.0252448	-0.131692	-0.0803968	0.0593133	-0.122574	0.10286	0.202784	yellow	ZNF787
ENSG00000122729.17	0.0566119	0.0881123	0.107458	0.0901509	0.283408	-0.0367128	0.100057	-0.275173	-0.126334	turquoise	CBX4
ENSG00000122862.4	0.164441	0.205984	0.1745	0.524045	0.200223	-0.239639	-0.0352473	-0.224756	-0.0720261	magenta	C11orf73
ENSG00000122873.10	0.0417868	0.227654	-0.0144102	0.525957	0.236614	-0.102988	0.245039	-0.242181	0.0934976	magenta	LRRC27
ENSG00000122882.9	0.0599151	0.0705114	0.136659	0.634554	0.293807	-0.107515	0.0965116	-0.35101	-0.187418	magenta	ESAM
ENSG00000122884.11	0.00591729	-0.10221	-0.0077751	0.493596	0.0997593	-0.0428947	-0.0669235	-0.0809704	-0.0960316	magenta	CCDC15
ENSG00000122952.15	-0.0849051	0.097237	0.691779	0.253412	0.253	-0.222175	0.0547347	-0.353351	-0.289767	green	MKI67
ENSG00000122958.13	0.162391	0.149065	0.217606	0.743982	0.350624	-0.287229	-0.0263858	-0.321644	-0.0806362	magenta	ENDOD1
ENSG00000123064.11	-0.138075	-0.110062	-0.0429982	-0.104287	-0.0825607	0.103632	-0.0297254	0.0961768	0.192533	yellow	JAM3
ENSG00000123080.9	0.0910964	0.257603	0.229198	0.144095	0.0575953	-0.254397	-0.0567343	-0.104319	-0.154127	green	RFC2
ENSG00000123104.10	-0.0901478	0.0264948	0.217606	0.0680648	0.058895	0.109445	0.137456	-0.0871917	-0.108537	green	RYBP
ENSG00000123131.11	0.104043	-0.0147332	-0.0402565	0.212096	0.475563	-0.100986	0.0208445	-0.356058	-0.0464172	turquoise	TMEM185A
ENSG00000123146.18	0.0585428	-0.0428323	0.227988	0.0678442	0.0739834	-0.0682707	-0.094504	-0.081514	0.0534854	green	BMS1P1
ENSG00000123159.14	0.288392	0.451131	0.0278237	-0.0398236	-0.0215288	-0.177022	-0.0458171	0.0170084	0.115306	pink	ZDBF2
ENSG00000123178.13	0.239229	0.106739	0.25783	0.142743	0.324328	-0.214212	0.0302472	-0.311928	-0.174	turquoise	UBXN6
ENSG00000123213.21	0.18175	0.0936751	0.215779	0.128791	0.136498	-0.15617	0.0426857	-0.168615	-0.142106	turquoise	RAB32
ENSG00000123219.11	0.049092	0.0380797	0.405204	-0.0486546	0.0911828	-0.174406	-0.029883	-0.168451	-0.242308	green	ANKRD13C
ENSG00000123240.15	-0.103498	-0.248784	0.0735036	-0.078941	-0.0818093	0.0717554	-0.117429	0.0972723	-0.17467	blue	HDAC8
ENSG00000123268.7	0.217452	0.00221337	0.0765358	0.0483528	-0.00494423	-0.277358	-0.344177	0.0609759	0.178666	yellow	HSPA4L
ENSG00000123349.12	-0.230903	-0.0519552	-0.231613	-0.0216245	-0.0663813	0.308657	0.251778	0.0787541	0.233689	brown	EDIL3
ENSG00000123352.16	-0.108311	-0.12857	-0.0875138	-0.175365	-0.246081	0.118401	-0.0851153	0.243423	0.100849	blue	ZNF691
ENSG00000123353.8	0.028683	0.0478754	-0.0398185	-0.0652449	0.0933878	0.0339082	0.0549845	-0.098805	-0.114342	turquoise	PAPD4
ENSG00000123374.9	0.0615792	0.0510718	0.126328	-0.116547	0.0357963	-0.165254	-0.20836	-0.00608762	-0.00401406	turquoise	CCDC127
ENSG00000123384.12	-0.223046	-0.120587	-0.187793	-0.139726	-0.133518	0.318478	0.173498	0.129305	0.0474506	brown	USP49
ENSG00000123395.13	0.0925326	0.0291511	-0.011354	0.12782	0.335273	-0.0740936	-0.0711147	-0.278832	0.0132799	turquoise	PRSS12
ENSG00000123416.14	0.0795526	0.10428	0.520876	0.296674	0.8138	-0.13951	0.28211	-0.789738	-0.401702	turquoise	S100P
ENSG00000123505.13	0.264394	0.186986	0.198582	0.229047	0.446726	-0.248359	0.03548	-0.393947	0.00591472	turquoise	TNNI3
ENSG00000123545.5	0.336817	0.14002	0.184347	0.212354	0.42037	-0.302729	-0.0727273	-0.366217	0.0138648	turquoise	PHF20L1
ENSG00000123609.9	0.022514	0.0914377	0.146454	0.143883	0.167949	-0.0065527	0.149713	-0.217258	-0.223234	turquoise	DHX35
ENSG00000123636.16	-0.124321	-0.207271	-0.289686	-0.207602	-0.372548	0.136214	-0.172745	0.404987	0.0808266	blue	RNMT
ENSG00000123739.9	0.165761	0.17331	0.0415956	0.104487	0.24153	-0.146943	0.0394236	-0.226825	-0.00518305	turquoise	PCGF1
ENSG00000123836.13	0.112813	0.150359	0.0421026	0.205998	0.115783	-0.0758661	0.103055	-0.147404	-0.0835324	magenta	BCKDHB
ENSG00000123843.11	0.284759	0.327983	0.196476	0.13932	0.174521	-0.181492	0.104022	-0.216532	-0.0439831	turquoise	DOPEY1
ENSG00000123983.12	0.0748546	0.13454	0.0945725	0.0634123	0.238515	-0.0453621	0.0468335	-0.242696	-0.190246	turquoise	ZDHHC2
ENSG00000123989.12	-0.110719	-0.0906629	-0.241535	-0.105486	-0.23899	0.219098	0.0713323	0.240582	0.136649	blue	OIP5
ENSG00000124171.7	0.115089	-0.118475	0.0156339	-0.113752	-0.0998637	-0.121242	-0.305604	0.148884	-0.0821577	blue	RBM14
ENSG00000124225.14	-0.045926	-0.0714311	-0.174241	-0.0747416	-0.340242	0.266338	0.114717	0.300211	0.143383	blue	LRRFIP1P1
ENSG00000124275.13	0.265264	0.0946474	0.0213458	0.0833181	0.308682	-0.165845	-0.0663531	-0.281125	-0.031349	turquoise	RRAGC
ENSG00000124299.12	-0.0632728	0.0217319	0.0544045	0.287142	0.506261	0.24884	0.565931	-0.512285	-0.162889	turquoise	TECPR1
ENSG00000124302.11	-0.155936	-0.0541583	-0.199489	0.0182936	-0.320342	0.00645786	-0.190328	0.327771	0.202417	blue	SAMD9
ENSG00000124370.9	-0.150709	-0.15565	-0.120688	-0.0348252	-0.152345	0.0950439	-0.0410648	0.145073	-0.133151	brown	PICK1
ENSG00000124380.9	0.134913	0.101683	0.0766849	-0.080117	-0.110062	-0.30169	-0.32368	0.118676	0.0294529	blue	HIRA
ENSG00000124422.10	0.0852347	0.162383	0.127721	0.0899088	0.392736	-0.095882	0.104473	-0.347581	-0.0648007	turquoise	2017-09-09
ENSG00000124444.14	0.237349	0.316026	0.0866423	-0.00228682	0.174611	-0.323018	-0.134492	-0.167549	-0.0138972	turquoise	NUDT19
ENSG00000124507.9	-0.234673	-0.180623	-0.0966746	-0.0902291	-0.278029	0.275838	0.0710499	0.274016	0.0103	blue	WNK4
ENSG00000124532.13	0.21037	0.0822379	0.145729	0.135879	0.281942	-0.149731	0.0373693	-0.252958	0.00857108	turquoise	AARS2
ENSG00000124562.8	0.105277	0.322534	0.296918	0.263581	0.382475	-0.223453	0.107589	-0.346331	-0.0242169	turquoise	PRKCG
ENSG00000124614.12	0.500133	0.642642	-0.0240748	0.0792957	0.148699	-0.44312	-0.16568	-0.143424	0.128462	pink	STAT5A
ENSG00000124767.6	0.190773	0.198889	0.209349	0.317982	0.317781	-0.311644	-0.029883	-0.296159	-0.162287	green	ARMCX1
ENSG00000124784.7	0.20157	0.197128	0.131836	0.107317	0.185543	-0.237466	-0.0591026	-0.170722	0.101745	turquoise	ARFGEF2
ENSG00000124787.12	0.241193	0.195841	0.0301971	0.0491834	0.172846	-0.192548	-0.0782525	-0.154871	0.131992	turquoise	PARD6B
ENSG00000124788.16	-0.0439514	-0.0515958	-0.078302	-0.144009	-0.206308	0.0862522	-0.0224151	0.183224	-0.0470995	blue	SIRT5
ENSG00000124795.13	0.0439807	0.149927	0.397582	0.0396795	-0.141845	-0.219973	-0.111294	0.078196	-0.0184242	green	ABCC10
ENSG00000124802.10	0.204623	0.149852	0.251626	0.266005	0.290236	-0.259639	-0.0121863	-0.24674	0.00175968	turquoise	STAU1
ENSG00000124882.3	0.533605	0.394315	0.0802127	0.0787727	0.188577	-0.327589	-0.0844225	-0.264268	-0.115949	black	PFKFB4
ENSG00000124942.12	-0.0675908	-0.16259	-0.272947	0.0440189	-0.171819	0.293063	0.0294851	0.213559	0.264042	yellow	CCNB2
ENSG00000125319.13	-0.00365234	-0.0740391	0.425864	0.0816158	0.100207	-0.158614	-0.133354	-0.134358	-0.216084	green	UBE2H
ENSG00000125347.12	-0.10126	-0.224985	-0.230207	-0.139462	-0.137146	0.246664	-0.0380877	0.166791	0.023969	brown	NUDCD1
ENSG00000125356.6	-0.241378	0.0477994	-0.182786	-0.0960148	-0.092432	0.288522	0.3196	0.0883571	-0.0252584	brown	PSMB3
ENSG00000125378.14	-0.14096	-0.062207	0.10901	0.130975	-0.000560241	0.147797	0.199311	-0.0173281	-0.0675025	brown	HEXDC
ENSG00000125445.9	0.128765	0.25989	0.137981	0.262639	0.553316	-0.113701	0.239533	-0.503684	-0.044933	turquoise	KAZN
ENSG00000125447.15	-0.0722356	-0.10778	-0.231916	-0.165766	-0.318291	0.158969	-0.123941	0.33166	0.18922	blue	S100A14
ENSG00000125454.10	0.217742	0.0587738	0.217472	0.092673	0.328871	-0.159486	-0.00226018	-0.3109	-0.0922948	turquoise	FAM179A
ENSG00000125457.12	-0.143823	-0.184268	0.0216349	0.0181295	0.039636	0.331401	0.266867	-0.0952922	-0.232865	brown	SLC35E2B
ENSG00000125459.13	0.127467	0.215813	0.162042	0.0660276	0.319209	-0.118414	0.120618	-0.36662	-0.222267	turquoise	PANX2
ENSG00000125482.11	-0.0557457	0.0559424	0.139516	0.0304904	-0.0152985	-0.191975	-0.188345	0.0585507	0.0523317	green	SRD5A1
ENSG00000125505.15	-0.0863615	-0.0971489	-0.222312	-0.0628205	-0.0783182	0.231466	0.130182	0.0902523	0.146917	yellow	FAM225B
ENSG00000125633.9	0.142827	-0.0467175	-0.0287385	-0.0655454	-0.123594	-0.212903	-0.348359	0.173005	-0.0167334	blue	ADNP
ENSG00000125637.14	-0.224164	-0.0416286	-0.0600709	-0.149336	-0.139166	0.161688	0.0588599	0.113499	-0.0336395	blue	ZMYND8
ENSG00000125648.13	-0.227762	-0.0320434	-0.0960824	-0.00237104	-0.229807	0.220903	0.140053	0.249593	0.135833	blue	RPL10A
ENSG00000125651.12	-0.0753971	-0.0277338	0.00902139	-0.0307702	-0.146643	0.0630494	0.04282	0.126569	0.0783363	blue	GPATCH3
ENSG00000125652.6	-0.183285	-0.123746	-0.198689	-0.17856	-0.134254	0.21403	0.0958204	0.13581	-0.0180481	brown	SLC5A3
ENSG00000125656.7	-0.0202899	-0.122383	-0.00104071	-0.0978291	0.219066	0.118269	0.138797	-0.19583	-0.0703126	turquoise	SMURF1
ENSG00000125657.4	0.21913	0.356557	0.162571	0.0486519	0.189626	-0.310974	-0.0943295	-0.206095	-0.0444728	pink	APCDD1L
ENSG00000125676.18	-0.215194	-0.167234	-0.0377675	-0.154368	-0.197799	0.161346	0.00626891	0.184535	-0.056138	blue	MYO19
ENSG00000125691.11	0.0251372	-0.134558	-0.342692	-0.0115036	-0.151219	0.138934	-0.119766	0.277767	0.691512	yellow	PBX1
ENSG00000125730.15	-0.0398629	-0.275191	-0.120166	-0.0216281	-0.157243	0.249497	0.0404397	0.172253	0.0409198	blue	FAM169A
ENSG00000125835.16	0.279272	0.455717	0.194236	0.237077	0.487187	-0.259961	0.150782	-0.468993	-0.039719	turquoise	KRT18P4
ENSG00000125863.16	0.171615	0.147683	0.335975	0.256842	0.388206	-0.22094	0.0581003	-0.393642	-0.161581	turquoise	HCG18
ENSG00000125868.14	0.148127	0.0372656	0.00253722	0.130015	0.29015	-0.0372855	0.0511893	-0.236536	-0.195232	turquoise	DLEU2
ENSG00000125870.9	0.136145	0.22371	0.0643839	0.122444	0.116976	-0.260519	-0.182389	-0.0726318	0.0138705	turquoise	FAHD2CP
ENSG00000125912.9	-0.0901854	-0.114942	-0.0777147	-0.0553165	-0.0531167	0.192444	0.116762	0.0801612	0.207118	yellow	SH3BGRL2
ENSG00000125952.17	0.321495	0.244604	-0.0833115	-0.0327388	-0.0081498	-0.238721	-0.199706	0.0233891	0.153939	black	NIPA1
ENSG00000125968.8	-0.170379	-0.158419	-0.111577	-0.0800329	-0.137198	0.296745	0.135279	0.132728	0.144497	brown	DDX3P1
ENSG00000126062.3	-0.0970147	-0.159633	-0.074058	0.000503295	0.00209565	0.133949	0.0070157	0.0324752	0.0882817	turquoise	TLE4
ENSG00000126067.10	-0.0694524	0.0920387	0.197532	0.280243	0.314287	-0.0616314	0.254191	-0.314239	0.0227409	turquoise	NUP160
ENSG00000126088.11	0.115754	0.120855	0.153277	0.212493	0.378602	-0.21405	0.103811	-0.388646	-0.0404875	turquoise	ATP6V1H
ENSG00000126226.20	-0.0293357	0.143215	0.385229	0.0816403	0.139323	-0.047074	0.116973	-0.227722	-0.19616	green	MPLKIP
ENSG00000126247.9	-0.118962	-0.0778841	-0.21161	-0.191392	-0.300939	0.28431	0.158719	0.299085	0.232997	blue	METTL6
ENSG00000126524.8	0.373442	0.145621	0.193702	0.132809	0.416212	-0.340245	-0.125404	-0.323293	-0.094509	turquoise	CCNB1
ENSG00000126562.15	0.309246	0.231788	-0.127722	0.106473	0.0262043	-0.154349	-0.133175	-0.00621322	0.088618	black	MST1P2
ENSG00000126602.9	0.0519372	0.022661	0.197437	0.206031	0.526394	0.0782113	0.398766	-0.549852	-0.198706	turquoise	DPP7
ENSG00000126709.13	-0.216315	-0.119043	-0.239196	-0.182835	-0.322113	0.229989	0.0524981	0.338491	0.10083	blue	CHDH
ENSG00000126749.13	0.185596	0.311852	0.0356528	0.107203	0.0336586	-0.182393	0.0320716	-0.0636574	0.150544	pink	H3F3A
ENSG00000126790.10	0.209036	0.183816	0.115268	0.292737	0.304369	-0.173847	0.0998969	-0.290798	-0.0670429	turquoise	SYAP1
ENSG00000126822.14	-0.0373794	-0.174308	-0.105016	-0.166595	-0.214332	0.113843	-0.0446797	0.228555	0.164931	blue	TMEM192
ENSG00000126838.8	0.0138942	0.16618	-0.078264	0.0710517	-0.117167	0.055073	0.131612	0.071151	-0.0119629	blue	DCAF16
ENSG00000126870.14	-0.126313	-0.129608	-0.17274	-0.0541504	-0.19164	0.17709	0.0154066	0.211626	0.101914	blue	PPIL1
ENSG00000126878.11	-0.0546603	0.212167	0.091466	0.294544	0.317008	0.0424901	0.296524	-0.358014	-0.170866	turquoise	SETD7
ENSG00000127084.16	-0.222469	-0.209859	-0.136521	0.0530932	-0.148132	0.323509	0.156736	0.149329	0.0666027	brown	CGN
ENSG00000127314.16	0.277473	0.144888	0.18017	0.12098	0.425179	-0.236619	-0.0784119	-0.366784	-0.126425	turquoise	KIAA0196
ENSG00000127334.10	0.0162804	-0.0658354	-0.0243305	-0.0542218	-0.13346	-0.0490238	-0.147961	0.197011	0.182469	blue	PDP1
ENSG00000127445.12	0.109262	0.31933	0.299819	0.300586	0.273765	-0.0863179	0.303497	-0.335267	-0.194759	red	TYW1
ENSG00000127481.13	-0.248878	-0.311626	-0.059509	-0.0613724	-0.13969	0.331726	0.181575	0.0861068	0.0399832	brown	RANBP9
ENSG00000127507.16	0.120871	0.0570826	-0.0330277	-0.0667663	-0.0220627	-0.056728	-0.147382	0.0251814	0.0959291	turquoise	RING1
ENSG00000127580.14	-0.165594	-0.0552691	-0.177752	0.0164342	-0.0421012	0.215854	0.165668	0.0184405	-0.101864	red	ARL4D
ENSG00000127585.10	-0.155721	0.018814	-0.221408	-0.0935712	-0.462135	0.161481	-0.038104	0.439744	0.18122	blue	UBE2O
ENSG00000127586.15	-0.186606	-0.144726	0.22446	-0.0676321	-0.167882	0.206144	0.157162	0.100344	-0.0948726	green	B3GALT6
ENSG00000127870.15	0.0374848	-0.029784	0.168812	0.212574	0.261281	-0.155451	-0.0504021	-0.26134	-0.114581	turquoise	SNRPD1
ENSG00000127914.15	-0.114368	-0.101361	-0.10307	-0.24869	-0.454074	0.167261	-0.0953879	0.424643	0.0110636	blue	RNF138
ENSG00000127920.5	0.202562	0.202736	-0.0441834	-0.0497514	0.132707	-0.225003	-0.124509	-0.0737834	-0.0297419	turquoise	COL4A2
ENSG00000127922.8	-0.0328735	0.463589	0.101531	0.108084	-0.0693112	-0.0321432	0.225594	0.0306641	0.0618042	pink	CARS2
ENSG00000127989.12	0.0695558	0.084773	0.0414166	0.0835299	0.299355	-0.0732901	0.0237718	-0.22572	-0.072735	turquoise	DSG3
ENSG00000128016.5	0.363451	0.115413	-0.00619139	-0.0665248	0.121138	-0.0685685	-0.0740171	-0.0963059	0.0407685	black	FGFR1OP
ENSG00000128050.7	0.172581	-0.0466719	-0.00264631	0.172855	0.34395	0.0064088	0.122474	-0.304421	0.0824941	turquoise	UNC5A
ENSG00000128059.7	0.341365	0.217496	-0.039881	0.129369	0.185173	-0.296534	-0.18462	-0.130069	0.129316	turquoise	ZNF346
ENSG00000128228.4	-0.018584	0.278958	-0.000316011	0.129434	0.0329392	0.109968	0.414108	-0.0966549	0.113548	red	DPP3
ENSG00000128266.8	-0.187579	-0.0636579	-0.233463	-0.110141	-0.367648	0.131847	-0.00657573	0.352529	0.129659	blue	POLR2M
ENSG00000128309.15	-0.121526	-0.187577	-0.048952	-0.0799173	-0.0920648	0.232485	0.131384	0.0609641	0.0525142	brown	SNHG19
ENSG00000128335.12	0.132441	0.298375	0.0545662	0.140061	0.10316	0.0832194	0.362325	-0.16328	-0.0581366	red	HOXB7
ENSG00000128422.14	-0.132586	-0.262343	-0.101302	-0.156636	-0.151592	0.1457	-0.0482684	0.16755	-0.0789494	blue	RNPC3
ENSG00000128463.11	0.148732	0.107403	0.173332	0.148662	0.462809	-0.0951144	0.172301	-0.4045	-0.135446	turquoise	TLN2
ENSG00000128487.15	-0.185645	-0.0278286	-0.0960913	-0.07259	-0.203834	0.168222	0.0914413	0.202887	0.149256	blue	NELL2
ENSG00000128595.15	-0.000613211	0.080335	0.163443	0.0807589	0.211042	0.0162618	0.15832	-0.211525	-0.357655	turquoise	VPS36
ENSG00000128609.13	0.146639	0.249484	0.0917282	0.198554	0.246514	-0.00253088	0.305829	-0.27064	-0.178296	turquoise	TMEM127
ENSG00000128654.12	0.132023	0.149128	0.169532	0.147929	0.418243	-0.103017	0.23678	-0.442664	-0.144609	turquoise	RBM3
ENSG00000128699.12	0.143468	0.14961	0.273216	0.102662	0.321176	-0.209495	0.0266759	-0.309804	-0.170902	turquoise	LYRM1
ENSG00000128708.11	0.111004	0.0988305	0.286702	0.0546077	0.400051	-0.266994	-0.00469058	-0.370497	-0.179539	turquoise	PGK1
ENSG00000128731.14	-0.136085	-0.0803453	-0.0938386	-0.132534	-0.128415	0.269671	0.205584	0.116741	-0.0109838	brown	GATM
ENSG00000128791.10	0.223422	0.148274	0.303937	0.278098	0.502948	-0.207688	0.0271751	-0.476065	-0.183856	turquoise	FUT11
ENSG00000128805.13	-0.168915	-0.0219246	-0.256777	-0.0252505	-0.276773	0.0498663	-0.150271	0.295457	0.163777	blue	PDSS1
ENSG00000128833.11	-0.151105	-0.206772	-0.108419	-0.0746879	-0.1984	0.185468	-0.00043483	0.205531	0.0582977	blue	FAM222B
ENSG00000128944.12	-0.0347153	0.0285134	0.728903	0.0854768	0.281996	-0.235879	-0.00791932	-0.349903	-0.274436	green	TEFM
ENSG00000128989.9	0.0806197	-0.0821012	-0.10468	-0.032197	0.00455657	-0.116753	-0.193609	0.0843791	0.0730031	turquoise	HPSE
ENSG00000129028.7	0.161201	0.0656368	0.130611	0.0426372	0.188843	-0.248833	-0.085941	-0.213147	-0.191396	turquoise	ZNF791
ENSG00000129038.14	-0.168682	-0.0934692	-0.260326	-0.0349992	-0.151753	0.329474	0.256977	0.144096	0.0975673	brown	SLC25A30
ENSG00000129055.11	0.182206	0.0987092	0.172338	0.0633811	0.284359	-0.204428	-0.0286896	-0.26854	-0.184872	turquoise	RAPGEF2
ENSG00000129084.16	0.150193	0.140658	0.114996	0.203982	0.126971	-0.215501	-0.0348061	-0.0970865	0.124295	turquoise	C16orf87
ENSG00000129116.16	-0.0179354	-0.109946	0.0960254	-0.0816614	-0.147838	0.0543231	0.0270079	0.11742	-0.0188615	blue	QSOX1
ENSG00000129128.11	0.358793	0.218521	0.108607	0.063339	0.106234	-0.263867	-0.0399467	-0.126979	-0.0708608	black	RAP1A
ENSG00000129187.13	0.169372	0.126982	0.0149101	0.160701	0.189135	-0.0897129	0.0523081	-0.197148	0.0416689	turquoise	SCAMP3
ENSG00000129194.6	0.214828	0.210726	0.149828	0.127202	0.357876	-0.0318243	0.152418	-0.36168	-0.150104	turquoise	TMEM50A
ENSG00000129235.9	-0.0917632	-0.10903	-0.154028	-0.0198732	0.0968542	0.073817	0.0276843	-0.0185368	0.208459	turquoise	TANGO2
ENSG00000129255.13	-0.108617	0.110379	0.0752633	0.0217421	0.151646	0.0516558	0.242507	-0.191546	-0.196566	turquoise	CMTM4
ENSG00000129315.8	-0.0496776	-0.253105	-0.2069	-0.138322	-0.302118	0.054151	-0.274791	0.368158	0.299108	blue	GNL3
ENSG00000129351.16	-0.215079	-0.175413	0.0676064	-0.0598194	-0.0924631	0.166436	0.162893	0.0944093	0.196777	yellow	RASGEF1A
ENSG00000129353.13	-0.0665756	-0.12995	0.0523636	-0.0057381	0.0620732	0.253372	0.244299	-0.0840237	-0.152954	brown	SREBF2
ENSG00000129354.10	0.0937229	0.133026	0.158339	0.3269	0.287446	0.0972953	0.387241	-0.344678	-0.0263461	turquoise	L1CAM
ENSG00000129422.12	-0.11752	-0.1635	-0.25276	-0.167517	-0.247911	0.0585562	-0.222099	0.306521	0.156114	blue	SYTL2
ENSG00000129480.11	-0.00561101	-0.153044	-0.0615884	-0.151921	-0.196414	-0.015543	-0.249122	0.252237	0.1794	blue	MECP2
ENSG00000129559.11	0.053819	0.252861	0.0191994	0.221405	0.336969	-0.0130543	0.355573	-0.309243	-0.0172046	turquoise	TMEM150A
ENSG00000129566.11	-0.0693376	-0.12928	-0.123325	-0.172969	-0.171316	0.129543	-0.0105911	0.173496	0.0219167	blue	ATXN2L
ENSG00000129636.11	-0.00366676	-0.0387758	0.0342271	0.00728661	0.201724	0.133534	0.224681	-0.205713	-0.171315	turquoise	ELMOD2
ENSG00000129667.11	-0.149085	-0.252012	-0.151	-0.0807246	-0.260601	0.193577	-0.0158876	0.255133	0.117261	blue	SRGAP3
ENSG00000129991.11	-0.266756	-0.135664	-0.401417	-0.158008	-0.420351	0.256449	-0.0719433	0.43687	0.146528	blue	NOL7
ENSG00000130023.14	-0.233338	-0.102366	-0.0178634	-0.14893	-0.169223	0.116212	0.0408409	0.139109	-0.0927987	blue	KIF3A
ENSG00000130164.10	0.383045	0.3386	0.192521	0.182418	0.217224	-0.223769	0.08442	-0.300294	-0.102799	black	APRT
ENSG00000130165.9	-0.0121144	-0.0193576	0.00040155	0.144386	0.51393	0.0493988	0.180187	-0.438018	-0.121097	turquoise	SGMS1
ENSG00000130175.8	0.0265982	0.0290202	-0.141927	-0.142727	-0.185768	-0.00993329	-0.169618	0.221492	0.114624	blue	ARMCX6
ENSG00000130203.8	0.187247	0.450448	-0.0641787	0.0125559	-0.111706	-0.143406	-0.0122462	0.0430187	0.141528	pink	SPDYE3
ENSG00000130204.11	0.237845	0.550407	0.273423	0.15056	0.149332	-0.378378	-0.0792381	-0.226044	0.0895028	pink	APTR
ENSG00000130227.15	-0.173622	-0.241991	-0.0672711	-0.145021	-0.230063	0.126859	-0.115157	0.245818	0.14956	blue	NEK1
ENSG00000130294.13	-0.0995577	0.0273079	0.00647205	-0.0515484	-0.08408	0.124222	0.166461	0.0391777	-0.0112397	red	CLPTM1
ENSG00000130311.9	0.255658	0.368185	0.183304	0.0579733	0.166209	-0.257128	-0.00749721	-0.220409	0.0303766	pink	VWA7
ENSG00000130414.10	-0.0933263	-0.0351965	0.106282	0.247705	0.227968	0.205215	0.372229	-0.293978	-0.186266	turquoise	DHDH
ENSG00000130449.5	0.0542031	-0.101352	-0.199312	-0.15538	-0.415259	-0.0541959	-0.313285	0.428571	0.297369	blue	CA14
ENSG00000130479.9	-0.161942	-0.0626233	-0.143842	-0.0137117	-0.0516367	0.140009	-0.018102	0.0625034	0.0359304	turquoise	ZNF814
ENSG00000130508.9	-0.108039	0.101436	-0.0241055	0.0894246	-0.126705	0.113968	0.136101	0.105499	0.129541	yellow	TMEM230
ENSG00000130513.6	0.052297	-0.261447	-0.266847	-0.194132	-0.237516	0.153824	-0.142621	0.269023	0.0633655	blue	PRR3
ENSG00000130529.14	-0.0695663	-0.190092	-0.211643	-0.208955	-0.316967	0.250878	-0.0681919	0.339007	0.0412173	blue	FAM200A
ENSG00000130717.11	0.150777	0.272695	0.0423883	0.0500591	0.0808315	-0.240814	-0.0891265	-0.0923885	0.0721277	pink	ROPN1L
ENSG00000130723.16	-0.191604	-0.191856	-0.246424	-0.0663304	-0.271308	0.112337	-0.123838	0.301585	0.0547102	blue	CBR4
ENSG00000130803.13	0.172494	0.0879154	0.03468	0.0606354	0.0192663	-0.264879	-0.252887	0.0200143	-0.00687729	turquoise	TOX
ENSG00000130921.6	-0.130206	-0.10438	0.0134728	-0.186841	-0.237594	-0.0125712	-0.17289	0.211102	0.0246891	blue	BEAN1
ENSG00000130935.8	0.0988188	0.038543	0.267437	-0.00750484	0.136109	-0.201946	-0.172821	-0.125073	0.0671335	green	KLRG2
ENSG00000130958.10	-0.177278	-0.100429	-0.130195	-0.0765545	-0.228009	0.138271	-0.0100368	0.242342	0.116235	blue	ARNT
ENSG00000131149.16	-0.220446	-0.24161	-0.114384	-0.199468	-0.382215	0.283858	0.0324953	0.368074	0.0487063	brown	UBE2E2
ENSG00000131236.15	0.265715	0.0475635	0.075424	0.187785	0.310845	-0.215635	-0.0381716	-0.279408	0.0867122	turquoise	RPL26L1
ENSG00000131238.15	0.0389742	0.0670362	0.218872	0.244733	0.498996	-0.0944163	0.206969	-0.509114	-0.210376	turquoise	FLT4
ENSG00000131242.14	-0.190339	-0.175295	-0.182264	-0.1421	-0.183888	0.352475	0.160281	0.170835	0.0761139	brown	NRBP2
ENSG00000131373.13	0.0123021	0.105771	0.153879	0.1816	0.482155	0.00993568	0.323954	-0.470818	-0.209445	turquoise	PLA2G4C
ENSG00000131374.13	-0.261371	-0.33013	-0.108014	0.0234229	-0.00387027	0.330368	0.195004	0.0238816	-0.0382944	brown	MIER2
ENSG00000131437.14	0.128537	0.101377	0.0884607	-0.0248765	0.058843	-0.19412	-0.128106	-0.0493862	-0.0983779	turquoise	KIAA1217
ENSG00000131462.6	-0.0654034	0.00993365	0.320134	0.134219	0.488742	0.0809804	0.418733	-0.519209	-0.283444	turquoise	BLOC1S4
ENSG00000131467.9	0.0851851	0.0582146	0.209878	0.258224	0.630317	-0.078637	0.206175	-0.573605	-0.191674	turquoise	BACE1
ENSG00000131469.11	0.235418	0.0780438	-0.168764	0.0407185	-0.0356501	-0.174984	-0.212393	0.173821	0.619729	yellow	ZNF75D
ENSG00000131470.13	0.231029	0.131619	0.227454	0.0176897	0.188214	-0.285403	-0.140553	-0.186355	-0.089184	green	2017-03-01
ENSG00000131473.15	0.267435	0.240314	0.148463	0.318391	0.313248	-0.10732	0.192748	-0.331367	-0.0561554	turquoise	AIDA
ENSG00000131507.10	0.0321582	-0.105164	0.0466455	0.0312261	0.234701	-0.109234	-0.0542761	-0.166911	-0.00885689	turquoise	KHDRBS1
ENSG00000131620.16	-0.143812	-0.198633	-0.0465485	-0.0677001	-0.164866	0.137971	-0.0886697	0.183959	0.0532199	blue	CYB5R1
ENSG00000131652.12	-0.237396	0.0212388	0.189628	0.115666	0.22613	0.151444	0.368809	-0.27954	-0.187583	red	LRRC37A3
ENSG00000131669.8	-0.274914	-0.169398	-0.118811	-0.0267506	0.0492986	0.378238	0.293806	-0.0606863	-0.272771	brown	ADAMTSL4
ENSG00000131711.13	0.117393	0.0818397	-0.0118806	-0.128249	-0.129117	0.0605403	0.0757115	0.100488	0.0168785	blue	UCHL3
ENSG00000131778.16	0.0486865	0.202359	0.0030554	-0.00883321	0.144718	0.0553732	0.231792	-0.196699	-0.0384736	turquoise	POLR1A
ENSG00000131871.13	0.21161	0.20363	0.0419055	0.0461089	0.0899858	-0.260708	-0.182536	-0.0895935	-0.0539166	turquoise	P2RY2
ENSG00000131873.5	0.207864	0.184322	0.168493	0.132756	0.082003	-0.189774	0.00262676	-0.0758454	0.0877875	turquoise	RAB6A
ENSG00000131876.15	0.166817	0.198398	0.402555	0.106675	0.293308	-0.339722	-0.0843476	-0.297494	-0.0618774	green	FOSL1
ENSG00000131941.6	0.19337	-0.0377216	-0.013184	0.107911	0.061438	-0.144606	-0.238276	-0.0292764	-0.00672599	turquoise	SNX2
ENSG00000131966.12	0.107765	0.0769931	0.0302153	0.132809	0.404499	-0.0135358	0.221059	-0.36	-0.19979	turquoise	CSGALNACT2
ENSG00000132002.6	0.0946569	0.0854291	0.31657	0.0238424	0.352371	-0.101732	0.103356	-0.354333	-0.132448	turquoise	DAXX
ENSG00000132170.18	0.285354	0.183001	0.0996125	0.397161	0.306982	-0.136711	0.0369335	-0.323255	0.0147992	magenta	FZR1
ENSG00000132182.10	-0.355641	-0.277461	-0.244145	-0.014455	-0.252957	0.544484	0.271149	0.26587	0.240183	brown	ETFB
ENSG00000132196.12	-0.0797234	0.141401	0.141138	0.0405833	0.113101	-0.0238234	0.102745	-0.148847	-0.234396	turquoise	KIFAP3
ENSG00000132286.10	0.166368	0.172908	0.135282	0.0699923	0.276384	-0.128432	0.0778904	-0.277952	-0.152224	turquoise	DPH3
ENSG00000132300.17	-0.106579	-0.0517068	0.0481234	0.0788784	-0.0290515	0.209247	0.240018	-0.000404373	0.0156978	red	RANGAP1
ENSG00000132313.13	0.100804	0.0395218	0.237389	0.159856	0.337634	-0.119766	0.126803	-0.355649	-0.0561294	turquoise	PHF5A
ENSG00000132329.9	0.0743965	0.135252	-0.0127702	0.000382086	0.113424	-0.113968	0.0112586	-0.0931783	-0.0318849	turquoise	NEFM
ENSG00000132341.10	0.185271	0.217312	0.414642	0.296712	0.564464	-0.316426	0.0732706	-0.523971	-0.0479308	turquoise	FAM96A
ENSG00000132356.10	0.143591	0.0597573	0.159603	0.111003	0.27746	-0.10613	0.0776261	-0.31971	-0.213504	turquoise	F3
ENSG00000132361.15	-0.0420792	-0.0979526	-0.177502	-0.0913765	-0.200061	0.137556	-0.000607368	0.214339	0.243202	yellow	SLC8A1
ENSG00000132406.10	0.146786	0.0838081	0.198203	0.140489	0.276069	-0.149415	0.0393862	-0.271581	-0.0837813	turquoise	PERP
ENSG00000132424.13	-0.226036	-0.191747	-0.0680374	-0.147121	-0.346506	0.154507	-0.0661915	0.328439	0.101748	blue	SLC44A2
ENSG00000132429.8	-0.0585165	0.0896847	0.0492368	0.0718506	0.165477	0.0628213	0.251588	-0.165413	-0.048607	turquoise	DTD2
ENSG00000132432.12	0.225702	0.222457	-0.0149543	0.0757406	0.145608	-0.293933	-0.107599	-0.0600089	0.0750673	turquoise	ATP13A3
ENSG00000132470.12	-0.28038	-0.316174	-0.156558	-0.0364837	-0.14486	0.63437	0.432558	0.105056	0.0357024	brown	TDRD7
ENSG00000132478.8	0.183904	0.256808	0.216766	0.107219	0.253352	-0.173083	0.0670728	-0.26681	-0.137545	turquoise	AKR1C3
ENSG00000132507.16	0.325403	0.502749	0.374238	0.334806	0.677563	-0.291658	0.280714	-0.646762	-0.0888774	turquoise	GUSBP1
ENSG00000132541.9	0.10206	0.219742	0.0966641	0.0917931	0.327783	-0.062204	0.186072	-0.295188	-0.0663219	turquoise	GIT2
ENSG00000132549.17	-0.261763	-0.164841	-0.108801	-0.157681	-0.298708	0.222464	0.0428741	0.275685	0.136633	blue	SLC7A1
ENSG00000132589.14	-0.29183	-0.21808	0.041454	0.056015	0.0545925	0.41771	0.416233	-0.0550538	-0.0835589	red	SIVA1
ENSG00000132603.12	0.373035	0.18936	0.10969	0.0622566	0.339886	-0.280391	-0.136101	-0.251279	0.0663584	turquoise	F2R
ENSG00000132612.15	-0.0575504	-0.0154914	-0.0791386	-0.15113	-0.139543	0.0136347	-0.0810647	0.158588	0.0273338	blue	HIGD1A
ENSG00000132676.14	0.12579	0.264759	0.370502	0.235913	0.352336	-0.089843	0.386304	-0.408843	-0.157831	turquoise	ALPK1
ENSG00000132680.9	0.117485	-0.0480858	-0.178978	-0.102245	-0.357003	-0.0729428	-0.374078	0.381969	0.208038	blue	CLCN4
ENSG00000132688.10	-0.0884169	0.145332	0.00645936	-0.141809	-0.312792	0.0514912	0.00532588	0.247274	0.0925663	blue	NCBP3
ENSG00000132698.12	-0.261745	-0.319998	-0.200711	-0.0536618	0.0837717	0.503994	0.280385	-0.0275778	0.0534336	brown	KDM5A
ENSG00000132780.15	-0.120247	-0.152646	-0.221691	-0.146064	-0.377418	0.147501	-0.109669	0.359859	0.243684	blue	SCML1
ENSG00000132819.15	-0.238417	-0.189026	-0.0921835	-0.0974812	-0.23251	0.235335	0.00993333	0.24894	0.0922584	blue	RPL23AP7
ENSG00000132842.12	-0.0267486	0.0847302	0.0402636	0.0699357	0.137275	0.0472247	0.195567	-0.12421	-0.00433965	turquoise	PPP2R4
ENSG00000132849.17	-0.237523	-0.331061	-0.119198	-0.0434868	-0.219125	0.385308	0.136224	0.182423	0.0272581	brown	KIF1B
ENSG00000132963.7	0.0341548	0.159014	0.200508	0.241071	0.156537	-0.2196	-0.0739134	-0.10553	0.089647	turquoise	PRRX2
ENSG00000132970.11	0.104267	0.0480943	-0.0318584	0.0280511	0.0116888	-0.107174	-0.168097	0.0483957	0.0843103	turquoise	TMEM92
ENSG00000133059.15	-0.19261	-0.221271	-0.085894	-0.252249	-0.241445	0.0990005	-0.135705	0.272324	0.0754393	blue	SMARCD3
ENSG00000133104.11	0.0696087	0.0999807	0.172744	0.239973	0.343114	-0.0741086	0.163247	-0.332143	-0.0769358	turquoise	ACAA2
ENSG00000133119.11	0.0763601	0.00113741	0.58969	0.17077	0.287238	-0.241801	-0.0406175	-0.343464	-0.199888	green	ATP5L
ENSG00000133131.13	-0.168277	-0.0997471	-0.054701	-0.196984	-0.250785	0.0776491	-0.115823	0.286843	-0.0359299	blue	HIST1H4I
ENSG00000133195.10	-0.224004	-0.0623563	-0.0339598	0.00541249	0.0897587	0.250656	0.369959	-0.0919857	-0.0377174	red	TMEM120A
ENSG00000133243.7	-0.0531883	-0.0959271	-0.140287	-0.044086	-0.259525	0.0488291	-0.125824	0.302958	0.170629	blue	HELZ
ENSG00000133275.14	-0.0803557	-0.0369382	-0.0905935	-0.162618	-0.225795	0.0943416	0.0198249	0.254998	0.183195	blue	UBL5
ENSG00000133313.13	-0.10395	-0.113039	-0.103246	-0.118639	-0.00100562	0.265097	0.229613	-0.0274115	-0.0116137	turquoise	SPG7
ENSG00000133393.11	-0.00912638	-0.00747202	0.369614	0.104481	0.204837	-0.135304	0.0118142	-0.19652	-0.131253	green	CRACR2B
ENSG00000133398.3	0.202569	0.123811	0.167454	0.140329	0.396413	-0.265612	-0.138124	-0.320567	-0.0260969	turquoise	EXOC8
ENSG00000133401.14	-0.0679153	-0.220098	-0.0168468	-0.103855	-0.174626	0.152812	-0.083165	0.192467	0.046682	blue	CTBS
ENSG00000133460.18	-0.218987	-0.131723	-0.369882	-0.291583	-0.478047	0.270122	-0.0126371	0.454667	0.137695	blue	A2MP1
ENSG00000133597.8	-0.0437732	0.013972	-0.163551	-0.0938308	-0.181084	-0.00266742	-0.158636	0.215962	0.134119	blue	KCTD3
ENSG00000133641.16	0.296956	0.138373	0.0909153	0.064915	0.166917	-0.325782	-0.224305	-0.147482	-0.00090801	turquoise	NOL6
ENSG00000133657.13	0.287619	-0.0347503	0.0201182	0.0341457	-0.0332847	-0.230911	-0.300428	0.0951706	0.0921949	black	RIC8B
ENSG00000133678.12	-0.262715	-0.166667	-0.0566253	0.398113	0.0641935	0.287739	0.341633	-0.122194	-0.1932	magenta	PDCD4
ENSG00000133773.10	0.165027	0.185863	0.0675644	0.0140186	-0.0137744	-0.283243	-0.278293	0.0280952	0.0971963	pink	GAPVD1
ENSG00000133812.13	-0.0310629	-0.113719	-0.205681	-0.128445	-0.32915	0.0139035	-0.226321	0.360598	0.0266751	blue	PTPRN2
ENSG00000133835.13	-0.0569684	0.0761388	-0.0976937	0.0533685	0.0623298	0.131352	0.228549	-0.0916097	-0.0592747	red	C10orf76
ENSG00000133935.6	0.0876935	0.133316	0.144502	0.270998	0.515688	-0.0655977	0.221888	-0.509491	-0.301423	turquoise	TMEM133
ENSG00000134001.11	0.43115	0.116403	0.0962597	0.13493	0.420224	-0.355587	-0.170763	-0.342466	-0.130893	turquoise	CCDC144A
ENSG00000134056.10	0.103084	0.0979431	0.0662981	0.0804196	0.221298	-0.136205	-0.0305737	-0.174428	-0.0352819	turquoise	VAMP8
ENSG00000134058.9	0.0375567	-0.115229	0.0946733	0.0310711	0.162804	-0.021412	-0.0326948	-0.160311	-0.115974	turquoise	DCLRE1B
ENSG00000134138.18	-0.228128	-0.0746746	-0.0763634	-0.0882716	-0.217518	0.103438	-0.0616557	0.233246	0.0809722	blue	THOP1
ENSG00000134152.9	0.0479819	0.125801	0.274739	0.0313044	0.110484	-0.179632	0.0337071	-0.14974	-0.17354	green	CYP4F11
ENSG00000134184.11	0.0181606	-0.0516852	0.0168574	0.122533	0.392862	-0.0145073	0.0979859	-0.340845	-0.0864436	turquoise	KARS
ENSG00000134202.9	0.151701	0.250466	0.145767	0.246191	0.504585	-0.19535	0.169416	-0.472747	-0.179085	turquoise	ADAT1
ENSG00000134243.10	-0.161459	-0.175793	-0.0292932	-0.0621608	-0.0419449	0.219175	0.128045	0.0779694	-0.182396	red	PKN2
ENSG00000134248.12	-0.0422147	0.083604	-0.0288467	-0.03253	0.229393	0.0776951	0.19535	-0.169464	-0.0440115	turquoise	COL17A1
ENSG00000134258.15	-0.220931	-0.197995	-0.391813	-0.121253	-0.207273	0.379677	0.0984082	0.220367	0.00577296	brown	PLPP1
ENSG00000134278.13	0.0964216	-0.0385154	-0.141273	0.0159298	-0.109944	-0.0471732	-0.164579	0.16867	0.186715	yellow	MAFG
ENSG00000134285.9	0.183914	0.243777	0.0306456	0.138252	0.24802	-0.125331	0.121899	-0.25631	-0.00805499	turquoise	SLBP
ENSG00000134291.10	-0.124997	0.0375597	0.247779	0.136786	0.453528	0.00535419	0.229783	-0.457173	-0.352221	turquoise	RPL39L
ENSG00000134294.12	0.395651	0.119669	0.0935571	0.00539723	0.276955	-0.137205	0.00813115	-0.295484	-0.0945072	black	MEAF6
ENSG00000134308.12	0.044261	0.158459	0.193579	0.199013	0.336564	-0.142579	0.133161	-0.319927	-0.0474524	turquoise	IGBP1
ENSG00000134333.12	0.150822	0.0489875	0.0654028	0.140304	0.42895	-0.074803	0.0743093	-0.379328	-0.0434966	turquoise	C9orf85
ENSG00000134352.18	0.224683	0.0449352	-0.015843	0.136742	0.136342	-0.0725163	0.0207222	-0.105419	-0.0274111	turquoise	IFT46
ENSG00000134369.14	-0.0170016	-0.121082	-0.151179	-0.190455	-0.286583	0.0251518	-0.181966	0.311907	0.0278505	blue	SRCAP
ENSG00000134375.9	0.365191	0.38728	0.264417	0.146893	0.483722	-0.38646	0.00525624	-0.424662	-0.0288516	turquoise	CNOT4
ENSG00000134419.14	0.24015	0.189996	-0.0989008	-0.00172761	-0.0168608	-0.220666	-0.197974	0.0991394	0.5561	yellow	TMEM94
ENSG00000134440.10	0.089655	0.111816	0.0813244	-0.0467257	0.155854	0.0460512	0.174561	-0.190053	-0.0272332	turquoise	RPE
ENSG00000134480.12	0.191054	0.168862	0.243365	0.217204	0.221249	-0.241217	0.00281597	-0.265337	-0.124667	turquoise	NEK9
ENSG00000134531.8	0.449569	0.106309	0.0296415	0.0808221	0.0823834	-0.221794	-0.224398	-0.0463945	0.0616145	black	CCT3
ENSG00000134539.15	-0.0411376	0.0127689	-0.146066	-0.130301	-0.192079	0.111227	0.00576215	0.182559	-0.00787444	blue	GPR155
ENSG00000134717.16	-0.0477811	-0.144253	0.158993	0.111501	0.389603	-0.0780814	0.0149571	-0.332286	-0.0884358	turquoise	NFE2L3
ENSG00000134755.13	0.0330345	-0.151686	-0.197912	-0.319125	-0.108645	0.134154	-0.0939592	0.163536	0.0610489	blue	RAD54B
ENSG00000134757.4	-0.0864879	-0.247526	-0.142531	-0.224433	-0.168111	0.122289	-0.126918	0.174168	-0.0037229	blue	ZNF165
ENSG00000134762.15	-0.114216	-0.0528146	-0.178696	-0.160234	-0.262192	0.0873882	-0.0794903	0.254361	0.0913761	blue	GTF2E2
ENSG00000134779.13	0.0635124	0.135161	0.0272499	0.182806	0.21598	0.129664	0.32197	-0.254751	-0.102232	turquoise	SHPK
ENSG00000134825.12	-0.141477	0.0951465	-0.0334531	-0.00956153	0.0656976	0.148531	0.289301	-0.05238	0.0196759	red	DDX19B
ENSG00000134871.16	-0.238166	-0.0781638	0.0149755	-0.0255841	-0.271354	0.246287	0.199478	0.251179	0.204287	blue	POLR2J3
ENSG00000134884.12	-0.00845354	-0.0958597	-0.254631	-0.229006	-0.500798	0.0433506	-0.300941	0.540075	0.19114	blue	LMBRD1
ENSG00000134955.10	0.0257989	0.0600807	0.0181301	0.0247491	0.128487	0.155666	0.283186	-0.186728	-0.032444	turquoise	JAK1
ENSG00000134970.13	0.225657	0.121912	0.278004	0.139883	0.271472	-0.317862	-0.0965032	-0.255998	-0.104232	turquoise	MXI1
ENSG00000135046.12	0.152214	0.0175815	0.194423	0.224462	0.443603	-0.0269823	0.173389	-0.414086	-0.256466	turquoise	KIF2C
ENSG00000135069.12	0.111625	0.111252	0.198901	0.0922616	0.205217	0.00799891	0.214269	-0.269116	-0.0702616	turquoise	CELSR2
ENSG00000135070.12	0.242922	0.0827194	0.0316225	0.137342	0.355791	-0.106173	0.0612573	-0.311976	-0.0979581	turquoise	RFWD2
ENSG00000135124.13	-0.137393	-0.0302306	0.0192628	0.136073	0.158949	0.313692	0.345652	-0.168834	-0.172067	brown	USP54
ENSG00000135185.10	0.119612	0.142014	-0.012476	0.153505	0.217999	-0.0513943	0.114512	-0.190554	-0.0923912	turquoise	STK26
ENSG00000135245.9	0.107022	0.0906949	-0.11497	0.186397	0.164766	0.0126705	0.0729462	-0.160852	0.0095637	turquoise	KIAA1033
ENSG00000135249.6	0.178072	0.186453	0.0885823	0.167556	0.352688	-0.19392	0.0200035	-0.328817	-0.0621026	turquoise	CCDC142
ENSG00000135253.12	-0.0992794	-0.00129868	-0.232479	-0.152305	-0.205864	0.277905	0.164307	0.159194	-0.044704	brown	TBC1D4
ENSG00000135272.8	0.137481	0.229	0.223646	0.0759566	0.0102055	-0.211479	-0.0839371	-0.0311963	-0.0448363	green	MRPL44
ENSG00000135316.16	0.258164	0.123654	0.168407	0.0701931	0.236829	-0.322871	-0.15941	-0.165762	0.124862	turquoise	THAP10
ENSG00000135318.10	0.0510372	0.0854623	0.224666	0.241345	0.288202	0.0550051	0.326996	-0.297638	-0.109185	turquoise	ARPP19
ENSG00000135334.8	0.213665	0.00300939	0.202215	-0.0213792	0.138437	-0.141875	-0.106045	-0.120142	0.0471921	turquoise	PALLD
ENSG00000135336.13	0.0126231	0.107192	0.341864	7.69313e-05	0.239527	-0.104849	0.138318	-0.253363	-0.20973	green	SUMF2
ENSG00000135341.16	0.21485	0.0789256	0.0711622	0.0885045	0.253244	-0.129138	0.0543382	-0.257506	-0.129658	turquoise	ATP1B2
ENSG00000135378.3	-0.163608	-0.159682	-0.280521	-0.131817	-0.14042	0.260966	0.0229398	0.155524	-0.0768942	brown	CARNMT1
ENSG00000135446.15	0.0539234	-0.0166753	0.121765	0.172037	0.610783	0.00808348	0.216057	-0.534402	-0.139116	turquoise	RAD21
ENSG00000135457.8	-0.123603	-0.260935	0.0319387	-0.130908	-0.0936822	0.0419589	-0.152875	0.120182	0.177482	yellow	RAD54L2
ENSG00000135473.13	-0.18065	-0.215131	0.0391898	-0.0610739	-0.0582377	0.10546	0.002318	0.031628	-0.128163	turquoise	SAP30L
ENSG00000135486.16	0.0614807	0.204342	0.137392	0.0141523	0.118811	-0.0415022	0.0821281	-0.111663	0.3106	yellow	TIGD6
ENSG00000135503.11	-0.0686208	-0.170043	-0.154701	-0.202681	-0.280896	0.0216212	-0.287191	0.342439	0.235955	blue	PITX2
ENSG00000135521.8	0.326799	0.215667	0.15217	0.143066	0.185112	-0.356812	-0.200274	-0.137943	0.119622	turquoise	ZC3H4
ENSG00000135535.13	-0.0325976	-0.0628331	0.0933544	0.164003	0.365039	0.0753272	0.217803	-0.325861	-0.192427	turquoise	MAP7D3
ENSG00000135617.3	-0.0710943	0.0928183	0.250613	0.18236	0.365601	-0.112847	0.198328	-0.368392	-0.243603	turquoise	RSPH14
ENSG00000135637.12	-0.0704094	-0.0178561	-0.144123	-0.158224	-0.334547	0.0186723	-0.211195	0.355306	0.166533	blue	BIK
ENSG00000135686.11	-0.180689	-0.198319	-0.211294	-0.0478371	-0.32518	0.289724	0.0598002	0.323755	0.125537	brown	SHMT2
ENSG00000135698.8	0.0563313	0.200471	0.286615	0.26789	0.472791	-0.184767	0.189061	-0.446759	-0.266895	turquoise	ERCC6L2
ENSG00000135749.17	-0.124145	-0.0950216	-0.0566018	-0.00168791	-0.143493	0.0955698	-0.0440931	0.131251	0.0942481	blue	DNM1L
ENSG00000135776.4	0.109732	0.0622721	-0.140864	-0.107685	-0.0797315	-0.0561201	-0.069709	0.123277	0.174117	yellow	SRRT
ENSG00000135778.10	0.00664707	0.129265	0.0750335	0.0961624	0.209276	0.0645912	0.351809	-0.233446	-0.0782944	turquoise	GNAS
ENSG00000135821.15	0.0117479	0.131361	0.201384	0.130701	0.361279	-0.0206919	0.189213	-0.379553	-0.315486	turquoise	HOXA9
ENSG00000135837.14	-0.263628	-0.140342	-0.0361581	-0.103197	-0.368155	0.0526166	-0.0940456	0.351554	0.148914	blue	PIK3C3
ENSG00000135842.15	-0.187972	-0.213819	-0.0560576	-0.149442	-0.190347	0.211609	0.0276555	0.159703	-0.0641493	blue	FKBP7
ENSG00000135862.5	-0.102957	-0.144926	-0.181834	-0.0998664	-0.234237	0.282864	0.117367	0.255391	0.11846	blue	VDAC3
ENSG00000135870.10	0.0976922	-0.0054606	0.140146	0.0740212	0.0104682	-0.218809	-0.236503	0.0549788	0.0218143	green	FAM76B
ENSG00000135900.3	-0.0174363	0.024142	0.0892453	-0.0531368	0.203017	-0.0830496	-0.0784663	-0.174797	-0.0461624	turquoise	ZFAND1
ENSG00000135919.11	0.23412	0.231665	0.139054	0.0424869	0.192842	-0.245666	0.00824802	-0.221886	-0.112176	turquoise	CA2
ENSG00000135932.9	0.191552	0.046187	0.0356665	-0.00110598	-0.0551736	-0.234378	-0.354398	0.102475	0.175417	yellow	STK3
ENSG00000135956.7	-0.0740127	-0.133029	-0.116359	-0.0712892	-0.119849	0.0439326	-0.172968	0.178817	0.0925898	blue	CDKN3
ENSG00000135976.15	-0.0720759	-0.136289	-0.0664725	-0.196109	-0.407352	0.0871753	-0.145618	0.352633	0.00302475	blue	AHSA1
ENSG00000136003.14	0.0608532	0.256038	0.202842	0.0196132	0.136046	-0.15481	0.00628975	-0.143461	-0.0711042	turquoise	FUNDC2
ENSG00000136026.12	-0.076799	-0.0939937	-0.216655	-0.108064	-0.258263	0.197175	-0.0783494	0.281594	0.152334	blue	C9orf9
ENSG00000136045.10	0.151212	0.103613	0.176734	0.109325	0.288712	-0.0818722	0.133377	-0.272753	0.0718808	turquoise	DDX21
ENSG00000136052.8	-0.0171792	0.221472	0.00903466	0.0854845	0.102984	-0.0533526	0.141629	-0.149227	-0.161633	turquoise	ENOX2
ENSG00000136122.14	-0.00512256	0.00675935	0.620077	0.225991	0.346717	-0.136927	0.126484	-0.426041	-0.326454	green	CDK2AP2
ENSG00000136143.12	0.179394	0.0693514	0.19501	0.24715	0.59443	-0.113768	0.176322	-0.542301	-0.356169	turquoise	TMC4
ENSG00000136156.11	-0.130548	-0.319881	-0.186558	-0.114089	0.160105	0.262366	0.1198	-0.0558269	-0.279957	brown	ZNF526
ENSG00000136193.15	0.0456361	0.0653169	0.261357	0.146494	0.278588	-0.113093	0.186389	-0.313884	-0.229815	turquoise	MMACHC
ENSG00000136205.15	-0.24063	-0.191158	-0.193588	0.0595909	-0.239388	0.390249	0.280949	0.211592	0.179636	brown	MKRN1
ENSG00000136235.14	-0.159933	-0.14808	-0.2791	-0.208558	-0.174965	0.10735	-0.1509	0.227965	-0.0401599	blue	UTP3
ENSG00000136238.16	-0.0656063	0.0371891	-0.0563046	-0.1265	-0.437148	0.0169479	-0.142275	0.430861	0.333347	blue	CC2D1A
ENSG00000136243.15	0.184885	0.114953	0.197083	0.0953247	0.26969	-0.147852	0.0816336	-0.295068	-0.264286	turquoise	GRSF1
ENSG00000136244.10	0.598548	0.27405	0.049664	0.117725	0.216585	-0.360313	-0.195152	-0.197503	0.0177331	black	COQ3
ENSG00000136261.13	-0.0659897	-0.21322	-0.0840183	-0.00452742	0.00276672	0.164097	0.100661	0.0102071	0.184907	yellow	ILKAP
ENSG00000136271.9	0.0978547	0.00680274	0.0674738	0.129546	0.455548	-0.124054	0.0368594	-0.385918	0.0545431	turquoise	MACROD1
ENSG00000136279.17	-0.134706	-0.106621	-0.0801908	0.0308371	0.176568	0.336571	0.446165	-0.196393	-0.119273	red	BTBD2
ENSG00000136295.13	-0.229205	-0.0657844	-0.321547	-0.0909618	-0.270667	0.373192	0.226854	0.2724	0.147594	brown	CHD1L
ENSG00000136450.11	0.10206	0.0874168	0.220027	0.196751	0.324739	-0.223828	-0.063952	-0.267362	0.156514	turquoise	COL4A5
ENSG00000136485.13	-0.351975	-0.250898	0.0410872	-0.0717911	-0.154911	0.287707	0.12146	0.130202	0.0795979	brown	RALGAPA2
ENSG00000136518.15	0.00815606	-0.054462	0.208212	0.266989	0.498094	-0.0592475	0.184065	-0.477294	-0.322891	turquoise	VPS29
ENSG00000136521.11	0.10285	0.0530488	0.0551273	0.181753	0.236705	-0.108715	0.0967896	-0.209518	-0.0755634	turquoise	SH2B3
ENSG00000136522.12	0.0136032	-0.0988861	0.184358	0.16809	0.214836	-0.155986	-0.10117	-0.15363	0.0587106	turquoise	RAD51AP1
ENSG00000136536.13	0.162718	0.107114	0.192126	0.183361	0.153463	-0.281688	-0.170574	-0.179614	-0.168843	turquoise	SMAD7
ENSG00000136574.16	0.0198795	0.00763398	-0.113404	-0.168104	-0.155843	-0.0773099	-0.260133	0.180102	0.0932773	blue	NRM
ENSG00000136603.12	0.375671	0.102263	0.169254	0.0745065	0.150434	-0.354401	-0.247295	-0.112126	-0.0902318	black	PTGES3
ENSG00000136628.16	0.0163395	0.0831205	-0.011928	0.0974339	0.0240088	0.111823	0.333981	-0.0692598	0.0981033	red	CAD
ENSG00000136643.10	-0.060407	-0.0265227	0.00480583	0.116278	0.0527464	0.09578	0.162932	-0.0583306	0.0205246	turquoise	APLP2
ENSG00000136682.13	0.251067	0.276877	0.0406422	0.0241982	0.284888	-0.291718	-0.0593965	-0.254334	-0.155832	turquoise	NDRG3
ENSG00000136718.8	0.177999	0.204955	0.0397169	0.220213	0.401529	-0.113068	0.165617	-0.354185	0.121057	turquoise	CDS2
ENSG00000136720.6	-0.0764152	-0.173837	-0.232686	-0.000833229	-0.202932	0.235155	0.00350315	0.212502	0.0657916	brown	TRIB3
ENSG00000136731.11	-0.0894721	-0.0802986	-0.0441642	-0.155649	-0.245616	0.0853785	-0.0980288	0.255837	0.00647582	blue	NDUFAF5
ENSG00000136738.13	0.260176	0.0894803	0.246831	0.126774	0.394124	-0.280076	-0.128802	-0.370646	-0.173713	turquoise	ZNF185
ENSG00000136770.9	0.0445952	-0.121336	-0.133979	-0.0782751	-0.1007	0.012792	-0.16381	0.13334	-0.0669818	blue	SLC25A37
ENSG00000136810.11	0.224104	0.206481	0.21597	0.109839	0.319164	-0.290951	-0.0667267	-0.227842	0.108086	turquoise	ARF1
ENSG00000136826.13	0.261574	0.0943092	-0.0277007	0.0218494	-0.0172537	-0.192016	-0.206469	0.0270154	0.0470953	black	CEP170
ENSG00000136827.11	0.0720312	0.054439	0.239835	0.239761	0.441364	-0.135808	0.0672737	-0.450748	-0.182344	turquoise	TRMT10A
ENSG00000136848.15	-0.151288	-0.0914637	-0.0635336	-0.115235	-0.263722	0.100543	-0.0390867	0.270155	0.119536	blue	FAHD2B
ENSG00000136868.10	0.0951447	0.0739042	0.222422	-0.00114378	0.225737	-0.123119	0.029934	-0.251013	-0.133604	turquoise	HNRNPLL
ENSG00000136875.11	0.0930834	0.0296852	0.0311194	-0.0361467	0.063917	-0.167093	-0.19555	-0.0307172	0.161556	turquoise	CAMKMT
ENSG00000136888.6	0.0183115	-0.0687041	0.0881615	-0.0268253	0.221045	-0.0696812	-0.180385	-0.131498	-0.169657	turquoise	MEIS1
ENSG00000136897.7	0.224687	0.123595	0.051891	0.031505	0.243539	-0.201828	-0.0468487	-0.214905	-0.0796993	turquoise	C1orf43
ENSG00000136908.16	-0.178688	0.0782864	0.0730617	0.18214	0.233433	0.195184	0.468392	-0.305914	-0.162243	turquoise	PTPRG
ENSG00000136930.11	0.0441515	0.207821	0.243481	0.0727637	0.40077	-0.0558742	0.343096	-0.421111	-0.151118	turquoise	FAM171B
ENSG00000136942.13	0.0159108	0.130151	-0.216693	-0.207964	-0.356809	0.0407087	-0.0842495	0.360863	0.643855	yellow	METTL21A
ENSG00000136997.13	0.509213	0.132139	-0.119704	0.160501	0.218283	-0.228907	-0.14425	-0.146419	0.238582	black	ANP32A
ENSG00000137100.14	-0.0975604	-0.0460206	0.150961	0.0818905	0.290727	0.0568748	0.164438	-0.280833	-0.14521	turquoise	MVB12A
ENSG00000137124.6	0.158752	0.20681	0.12873	0.164936	0.273882	-0.0659199	0.176374	-0.313237	-0.0060211	turquoise	ARHGEF19
ENSG00000137177.17	-0.139649	-0.0998608	-0.0994024	-0.0140534	-0.328879	0.146574	-0.0549776	0.321752	0.154471	blue	SNRPC
ENSG00000137193.12	0.012282	-0.211509	-0.0926031	-0.0727717	-0.170838	0.0785723	-0.192024	0.18462	0.0471678	blue	EVI2A
ENSG00000137203.9	-0.0271601	-0.0144277	-0.206586	-0.108183	-0.381151	0.104553	-0.113501	0.405192	0.097542	blue	MOCS3
ENSG00000137207.10	-0.182844	-0.156294	0.114373	0.0760632	0.226011	0.232173	0.366255	-0.268157	-0.343826	brown	EMC6
ENSG00000137269.13	-0.00998763	-0.138825	-0.0870749	-0.0883304	-0.227777	0.102665	-0.131768	0.27472	0.13423	blue	MPST
ENSG00000137288.8	-0.2632	-0.0421325	0.0154736	0.0503978	-0.105706	0.302551	0.477503	0.0433623	0.0971988	red	RRAS
ENSG00000137309.18	0.319865	0.353693	0.201177	0.331063	0.419554	-0.199975	0.221702	-0.439586	0.263912	turquoise	PRR12
ENSG00000137310.10	0.0592213	0.068556	0.209782	0.0376275	0.0270826	-0.109178	-0.0277736	-0.0711396	-0.0963808	green	CENPB
ENSG00000137312.13	-0.0436848	0.0756859	0.202977	0.181369	0.233294	0.0463914	0.278802	-0.273831	-0.197501	turquoise	VASP
ENSG00000137331.11	0.400199	0.0628663	-0.242922	-0.0929975	-0.0484522	-0.10931	-0.233814	0.107199	0.210442	black	SYMPK
ENSG00000137337.13	-0.164896	-0.0937055	0.0724107	0.00941515	-0.187629	0.00199353	-0.0736741	0.203555	0.0347447	blue	SNRPD2
ENSG00000137343.16	0.101172	0.116367	-0.120167	0.109773	0.0353075	-0.0395826	-0.00130591	-0.0387616	-0.0299349	turquoise	SH2D3A
ENSG00000137364.4	0.053263	0.08987	0.230524	0.235902	0.471162	-0.0184415	0.29183	-0.463653	-0.212879	turquoise	SERPINB6
ENSG00000137404.13	-0.29462	-0.155835	0.139792	0.00733434	0.0966056	0.252282	0.28145	-0.0696697	-0.144517	red	OPA3
ENSG00000137411.15	-0.0434212	-0.0236549	-0.114168	-0.0395362	-0.105386	0.0285695	-0.0561581	0.143273	0.142119	yellow	SDCBP2
ENSG00000137478.13	-0.076883	-0.10029	-0.179363	-0.050133	-0.148007	0.0414238	-0.0902361	0.177898	0.0553673	blue	CHCHD6
ENSG00000137492.6	0.0959458	0.0540455	0.0632688	-0.0565277	-0.0995294	-0.272546	-0.348688	0.163787	0.161718	blue	CPAMD8
ENSG00000137494.12	0.00373734	-0.00682198	-0.099901	0.0507701	0.0853899	-0.0755111	-0.126157	-0.0308259	0.0346414	turquoise	SPATC1L
ENSG00000137497.16	-0.258982	-0.152844	-0.0138111	-0.126006	-0.108814	0.258857	0.0764728	0.0714351	-0.168051	brown	THEM4
ENSG00000137502.8	0.0771472	-0.0508033	-0.0915525	-0.119933	-0.0418503	-0.0772539	-0.140385	0.0948247	0.0639569	blue	LRRC3
ENSG00000137513.8	0.0752433	0.143413	0.131893	0.200277	0.290949	-0.11969	0.052694	-0.280532	-0.0447286	turquoise	RRP1
ENSG00000137563.10	0.0254224	0.0207786	0.155618	-0.0282382	0.210884	-0.149562	-0.053123	-0.202282	-0.20303	turquoise	HERC3
ENSG00000137575.10	0.0985759	0.131788	0.210112	0.245459	0.531213	-0.186898	0.144281	-0.492266	-0.34088	turquoise	SHF
ENSG00000137692.10	0.170478	0.0632258	0.166629	0.173371	0.357299	-0.208317	-0.0215533	-0.301476	-0.0173734	turquoise	NACC1
ENSG00000137693.12	-0.0469189	-0.137052	-0.151083	-0.249799	-0.52687	0.0327944	-0.271334	0.517597	0.24776	blue	FAM189B
ENSG00000137699.15	-0.217633	-0.252569	-0.166569	-0.119569	-0.0119158	0.398336	0.126691	0.0211194	-0.107195	brown	SLC25A45
ENSG00000137700.15	-0.177738	-0.102537	-0.0215929	-0.051053	0.00539726	0.135113	0.135308	-0.0187347	-0.0581842	turquoise	CCNF
ENSG00000137713.14	0.038368	0.142962	0.18012	0.00932249	0.241117	-0.176237	-0.0321172	-0.250387	-0.122633	turquoise	NAPEPLD
ENSG00000137714.2	0.126101	0.213362	0.0309164	-0.0324082	0.0361295	-0.135351	-0.0381354	-0.0329319	-0.0672693	turquoise	MAML1
ENSG00000137720.6	-0.0436502	-0.109913	-0.0360313	-0.133682	-0.00507734	-0.000316477	-0.100378	0.0741218	0.0189989	turquoise	TUBA3FP
ENSG00000137806.7	0.0871104	0.0510449	-0.0844848	-0.0106004	0.0983513	-0.130774	-0.127688	-0.0536921	0.0308875	turquoise	CSDC2
ENSG00000137845.13	-0.0197695	-0.0804053	0.0924816	-0.00409392	0.0525542	0.189207	0.283571	-0.0699019	-0.116651	red	MAB21L3
ENSG00000137857.16	-0.16851	-0.205711	-0.286676	-0.195651	-0.220401	0.286046	0.00614519	0.23366	-0.0180334	blue	CES4A
ENSG00000137868.17	-0.115056	-0.217554	-0.270328	-0.09902	-0.0655304	0.318873	0.152477	0.0608668	-0.0270831	brown	C16orf91
ENSG00000137876.8	0.246119	0.0888213	0.0729869	0.156358	0.177537	-0.247719	-0.165649	-0.108095	0.168952	turquoise	HSPA6
ENSG00000137947.10	-0.0387848	-0.191978	-0.0809277	-0.0328086	0.103778	-0.0231411	-0.0942109	-0.0585793	-0.000170374	turquoise	GNA15
ENSG00000137962.11	0.244635	0.212745	0.00647015	0.215197	0.0832541	-0.107384	0.109429	-0.114249	0.147571	magenta	AHRR
ENSG00000137996.11	0.0846516	0.0749593	0.367577	0.0606037	0.306033	-0.193385	0.0369287	-0.335558	-0.229831	green	LPAR2
ENSG00000138035.13	0.122879	0.0627301	0.362036	0.290933	0.383806	-0.201474	0.0975703	-0.400299	-0.085574	turquoise	POLR2E
ENSG00000138050.13	0.138342	0.0632435	-0.0973432	-0.0304022	-0.098759	-0.158812	-0.254122	0.115913	0.170565	yellow	MYO3A
ENSG00000138061.10	0.0406913	0.157625	-0.115734	-0.1907	-0.00213001	0.0121366	0.111748	-0.0453506	-0.115393	turquoise	SH2D3C
ENSG00000138107.10	-0.073538	-0.0388441	0.102964	0.0805332	0.255606	0.131787	0.31576	-0.317236	-0.238101	turquoise	HAUS1
ENSG00000138138.12	0.188928	-0.050457	-0.0122729	0.167493	0.269345	-0.0866285	-0.0386859	-0.227501	0.00160875	turquoise	CRIM1
ENSG00000138175.8	0.133933	0.170125	0.074388	0.164087	0.33234	-0.0318725	0.264913	-0.359193	-0.198726	turquoise	PDK1
ENSG00000138193.13	-0.0398123	-0.177331	-0.159026	-0.072242	-0.2332	0.0769979	-0.0880309	0.221657	-0.0259228	blue	MBIP
ENSG00000138271.5	0.351578	0.174789	-0.0373423	-0.00672683	0.115564	-0.219685	-0.174322	-0.116392	0.0365112	black	HIPK3
ENSG00000138279.14	-0.011294	-0.014019	0.248008	0.777299	0.433953	0.0258158	0.329424	-0.468964	-0.194525	magenta	COMMD7
ENSG00000138381.8	0.182487	0.126517	0.234155	0.0138298	0.13064	-0.337058	-0.182942	-0.107021	-0.0566894	green	GDPD3
ENSG00000138385.14	0.181415	0.0724981	0.0665818	-0.00493396	0.10016	-0.303408	-0.229644	-0.0139772	0.209547	turquoise	PLS3
ENSG00000138386.15	0.068289	-0.0255898	0.0208285	0.0477471	-0.10379	-0.10607	-0.0919747	0.0880712	0.0010466	blue	PLLP
ENSG00000138413.12	0.0309692	0.186281	-0.0599459	0.179468	0.318587	0.0539821	0.321768	-0.316668	-0.0585232	turquoise	HMOX2
ENSG00000138430.14	0.15641	-0.0722815	0.135447	0.110754	0.166657	-0.207918	-0.184761	-0.113034	0.0352206	turquoise	RP2
ENSG00000138660.10	0.277251	0.217232	0.19578	0.0434835	0.19284	-0.337275	-0.204289	-0.179059	-0.065223	turquoise	HTRA2
ENSG00000138663.7	0.136073	0.170682	0.0801934	0.0879447	0.281899	-0.265563	-0.0540974	-0.270032	0.0267573	turquoise	HEMK1
ENSG00000138678.9	0.169508	0.0658168	0.13983	0.0319905	0.271628	-0.107018	0.0626041	-0.281156	-0.0510401	turquoise	RRP9
ENSG00000138688.14	-0.283482	-0.247528	-0.161222	-0.102331	-0.316782	0.219282	0.0493394	0.299393	0.0452637	blue	COQ10B
ENSG00000138757.13	0.305533	0.18617	0.0115335	-0.00246758	0.0651469	-0.320144	-0.271241	-0.0504079	-0.0471413	black	GNAI2
ENSG00000138760.7	-0.0728946	-0.193544	-0.14236	0.0531743	-0.13008	0.0880834	-0.117983	0.151135	0.0824165	blue	RPL24
ENSG00000138764.12	0.040244	-0.0547885	0.295663	-0.00797161	0.0105409	-0.168293	-0.219277	-0.0303752	-0.125349	green	IFT57
ENSG00000138772.11	0.338043	0.166196	0.324739	0.222814	0.408054	-0.21871	0.0980374	-0.395951	-0.108593	turquoise	UMPS
ENSG00000138777.18	0.0674229	0.103639	0.0486521	0.145438	0.442436	0.0458911	0.373459	-0.437937	-0.162658	turquoise	ITGB6
ENSG00000138785.13	0.241304	0.141533	-0.0880547	-0.0761465	0.130476	-0.202451	-0.190694	-0.0663507	0.0236702	turquoise	FNDC4
ENSG00000138794.8	0.0734333	0.0617651	0.207851	0.222512	0.325946	-0.0460276	0.152048	-0.340551	-0.108839	turquoise	NDUFS7
ENSG00000138802.10	0.0335886	-0.128002	-0.030919	-0.07711	0.0428547	-0.0789044	-0.194555	0.0330629	0.0580163	turquoise	MOGS
ENSG00000138814.15	0.39134	0.189422	0.0974647	0.112545	0.0118887	-0.259755	-0.149216	0.00446928	0.05327	black	TFCP2L1
ENSG00000138821.11	0.220008	0.188588	0.0456662	0.0395839	0.202847	-0.201243	0.00926264	-0.22173	-0.15704	turquoise	TP53I3
ENSG00000138835.21	0.00845632	-0.0028805	0.139879	0.0557221	0.106547	-0.156576	-0.165903	-0.0940115	-0.0388993	turquoise	VPS54
ENSG00000139117.12	0.274017	0.228943	0.130019	0.12887	0.32658	-0.193013	0.0739627	-0.304791	-0.205757	turquoise	RYK
ENSG00000139131.11	0.163066	0.136437	0.100952	0.214501	0.426717	-0.118099	0.116778	-0.399621	0.00394973	turquoise	RCHY1
ENSG00000139132.13	0.205256	-0.0442404	-0.0290718	0.0305038	-0.100283	-0.0791557	-0.168729	0.113719	0.138991	yellow	TTC14
ENSG00000139146.12	0.0885386	-0.0665033	0.0881112	0.0474196	0.202191	-0.00322924	0.0496747	-0.191868	-0.0858608	turquoise	APBB2
ENSG00000139154.13	0.211745	0.191604	0.253669	0.201761	0.22012	-0.248092	-0.0782157	-0.199285	-0.0716425	turquoise	STT3B
ENSG00000139163.14	0.150362	0.108153	0.0873336	0.103905	0.34141	-0.158238	-0.00446742	-0.266437	-0.150252	turquoise	IFI16
ENSG00000139180.9	0.163273	0.368553	0.0326619	0.127189	0.02586	-0.13367	-0.0713142	-0.0254239	0.0941255	pink	BROX
ENSG00000139211.6	0.41886	0.298934	0.0784289	0.0740848	0.166196	-0.235784	-0.0497758	-0.22369	-0.0550853	black	LIPH
ENSG00000139233.5	0.254153	0.144801	0.000957461	-0.014136	-0.016735	-0.281002	-0.294762	0.0967497	0.148401	black	DCAF13
ENSG00000139263.10	0.0904292	-0.0979969	-0.0545425	-0.005519	0.0273019	-0.020862	-0.171899	0.0206193	0.0368181	turquoise	OXR1
ENSG00000139289.12	0.56247	0.188882	0.0158337	0.0233425	0.155177	-0.184868	-0.0736549	-0.139613	0.0926061	black	TRPV6
ENSG00000139318.7	0.388556	0.0761564	-0.106632	-0.0998311	-0.0685562	-0.192627	-0.227232	0.0516506	0.04061	black	PIGO
ENSG00000139324.10	0.174689	0.195431	0.16962	0.0285082	0.197615	-0.144247	0.0518945	-0.198589	-0.238771	turquoise	TRMT10B
ENSG00000139343.9	0.276972	0.313418	0.189714	0.137128	0.152357	-0.352324	-0.149889	-0.119019	0.306625	pink	INPPL1
ENSG00000139350.10	0.0720117	0.156194	0.367783	0.0997233	0.12769	-0.170694	0.0442612	-0.213031	-0.273295	green	PCF11
ENSG00000139410.13	-0.10653	-0.225802	-0.153339	-0.0982997	-0.0761432	0.218332	0.0571977	0.100709	-0.0635072	brown	NDUFB8
ENSG00000139496.14	0.0963175	0.0558016	-0.00130207	0.088018	0.0393036	-0.218337	-0.232463	-0.00113475	0.0275199	turquoise	TEF
ENSG00000139505.11	0.166979	0.112872	0.318191	0.14908	0.149138	-0.249949	-0.112547	-0.207049	-0.12541	green	DUSP18
ENSG00000139517.7	0.0760309	-0.0527453	0.0425442	-0.0506266	-0.0933204	-0.141346	-0.278966	0.124849	0.0651096	blue	SLC27A4
ENSG00000139579.11	-0.00101282	0.0176289	0.00132737	0.105909	0.175555	-0.0395494	-0.0321841	-0.167935	0.10044	turquoise	DAGLB
ENSG00000139613.10	-0.0687449	0.0162719	-0.0874315	0.0104627	0.046587	0.168042	0.162023	-0.0787601	-0.0502384	turquoise	STXBP5
ENSG00000139620.11	0.0236162	-0.00810407	0.022845	-0.034819	0.146657	-0.0846099	-0.0968447	-0.128161	0.0443075	turquoise	SFMBT1
ENSG00000139645.9	-0.0761063	-0.126357	-0.0702339	-0.0822161	-0.159139	0.0520736	-0.13376	0.191575	0.179682	blue	KIAA0895
ENSG00000139718.9	-0.1096	-0.0915797	-0.1481	-0.190895	-0.284612	0.0270971	-0.224452	0.301322	0.00440067	blue	XRRA1
ENSG00000139726.9	0.227112	-0.0586729	0.132446	0.173886	0.304657	-0.220063	-0.132989	-0.227182	0.0672745	turquoise	WEE1
ENSG00000139921.11	0.211798	0.125757	0.276207	0.150243	0.556923	-0.32801	-0.0745214	-0.509189	-0.31433	turquoise	DTWD2
ENSG00000139926.14	0.43152	0.225135	-0.049709	0.0789637	0.164087	-0.215454	-0.0285158	-0.161274	0.0316007	black	CLIC3
ENSG00000139974.14	-0.0465948	0.133682	0.150632	0.136909	0.069139	-0.0769721	0.123089	-0.119771	-0.0740528	turquoise	ZNF747
ENSG00000140006.10	0.149056	-0.107018	0.0192261	-0.060435	0.00415366	-0.131128	-0.222594	-0.000647549	-0.0805141	turquoise	CHD3
ENSG00000140022.8	-0.185056	0.0273293	-0.0284919	-0.0242595	-0.0672331	0.124985	0.137032	0.0524783	-0.0200321	red	TSEN34
ENSG00000140153.16	0.254428	0.100192	0.105699	0.122883	0.283852	-0.142244	-0.0192161	-0.263697	-0.160991	turquoise	KRT15
ENSG00000140157.13	0.158125	0.183311	0.246269	0.130599	0.468303	-0.269111	-0.000165582	-0.493852	-0.259826	turquoise	GPHN
ENSG00000140264.18	-0.109435	0.285414	-0.114644	0.0557956	0.0217422	0.187047	0.432509	-0.0828318	0.0236568	red	LRRC20
ENSG00000140307.9	0.101607	-0.00437637	0.192964	0.17004	0.418795	-0.106108	0.110894	-0.33258	-0.115262	turquoise	SNCG
ENSG00000140320.10	-0.0352869	-0.0883848	-0.228147	-0.139591	-0.272569	0.0752875	-0.113252	0.284847	0.171538	blue	MALT1
ENSG00000140374.14	0.0898346	0.190172	0.187664	0.253787	0.603209	-0.086743	0.313736	-0.530529	-0.180676	turquoise	ANKRD36C
ENSG00000140395.7	-0.0890075	0.0152221	0.156327	0.182419	0.444211	0.166704	0.466423	-0.426592	-0.150485	turquoise	IQCK
ENSG00000140400.13	-0.184038	-0.177922	-0.103543	-0.125544	-0.197783	0.229976	0.0306935	0.188121	-0.0473312	blue	STAG3L3
ENSG00000140416.18	0.0202427	-0.0568824	0.100263	0.143257	0.0633869	0.195963	0.242191	-0.0940964	0.0596424	brown	MAP3K11
ENSG00000140450.8	-0.111353	-0.20968	-0.226846	-0.0456464	-0.158776	0.142228	-0.0475416	0.217751	0.126201	blue	RFESD
ENSG00000140459.16	-0.0267571	-0.138899	-0.30087	-0.161174	-0.0865168	0.166138	0.00127757	0.138336	0.0976155	blue	TLR6
ENSG00000140465.12	-0.140194	-0.00528971	-0.123081	-0.372717	-0.0608391	0.116054	0.104605	0.0425025	-0.169	turquoise	MGA
ENSG00000140474.11	-0.118906	-0.0360678	0.0025047	-0.0208107	-0.00767571	0.159799	0.195075	-0.0526886	-0.165223	red	PIGG
ENSG00000140525.16	-0.0792933	0.0784226	0.670839	-0.0187949	0.133797	-0.163475	0.0543898	-0.225787	-0.256454	green	PARL
ENSG00000140526.15	-0.173692	-0.328561	0.0269571	-0.141676	-0.058716	0.183074	0.00664781	0.0725874	-0.0259618	brown	CSRP2
ENSG00000140564.9	-0.0864118	-0.0576819	-0.263802	-0.161215	-0.115062	0.145936	-0.0081575	0.142291	0.125309	blue	CST6
ENSG00000140577.14	-0.113334	-0.0709725	-0.0103011	-0.0904353	-0.209547	-0.00363928	-0.229135	0.237545	0.137501	blue	CCNE2
ENSG00000140612.12	-0.0431592	0.0143548	-0.083915	0.0140877	0.11053	0.0142925	0.0168148	-0.0343799	0.198157	turquoise	UBE2C
ENSG00000140694.15	-0.171209	-0.150243	-0.0260497	-0.0887307	0.0748463	0.196076	0.211353	-0.0784547	-0.00777329	red	SAMD12
ENSG00000140750.15	-0.0280312	-0.141009	-0.0923725	-0.277704	-0.171161	0.00848642	-0.159838	0.220073	0.150624	blue	GALNT11
ENSG00000140830.7	0.189294	0.111428	0.08497	0.00399683	0.133588	-0.282524	-0.233924	-0.085445	-0.00837215	turquoise	PLAG1
ENSG00000140832.8	-0.142908	-0.0787462	-0.25827	-0.173337	-0.388255	0.137471	-0.0616015	0.391716	0.25037	blue	MRPS23
ENSG00000140859.14	0.114771	0.0914607	-0.0791283	0.0532418	-0.0807212	-0.0762036	-0.0828074	0.0790758	0.0128372	blue	ANKRD18A
ENSG00000140939.13	-0.0115411	-0.0159219	-0.149857	-0.119136	-0.0846295	-0.0103025	-0.172239	0.117453	-0.0145618	blue	SKIDA1
ENSG00000140943.15	-0.139314	-0.0251344	-0.163055	-0.0677613	-0.101041	0.26426	0.1962	0.0728134	-0.0974528	brown	TSEN54
ENSG00000140988.14	0.117775	0.536272	0.0112085	0.132989	-0.128312	-0.0641382	0.303817	0.0241747	0.348792	yellow	ZSCAN2
ENSG00000141030.11	0.133826	0.0464319	0.127323	0.200942	0.599309	-0.135417	0.103795	-0.500499	-0.131068	turquoise	ZDHHC23
ENSG00000141076.16	0.228545	0.149283	0.0809746	0.231537	0.340995	-0.209868	-0.00397029	-0.312261	-0.0823902	turquoise	METTL23
ENSG00000141127.13	0.0604961	0.0196924	0.248848	0.13593	0.246736	-0.169024	0.038794	-0.230636	-0.104347	turquoise	HDDC3
ENSG00000141232.4	0.274696	0.00190333	0.0987427	0.143922	0.378818	-0.189655	-0.119085	-0.318504	-0.125541	turquoise	PEAR1
ENSG00000141293.14	-0.19175	-0.123226	-0.105967	-0.0779676	-0.0785075	0.293278	0.281013	0.0353118	-0.152323	red	TAF9B
ENSG00000141298.16	-0.0720428	-0.159203	-0.111869	-0.0322003	-0.140974	0.0920463	-0.146754	0.176744	0.0909838	blue	CIB1
ENSG00000141376.19	-0.271519	-0.22777	-0.0541003	-0.0590247	-0.196306	0.203744	-0.0877113	0.199694	-0.079657	blue	CHM
ENSG00000141378.14	0.175896	0.225984	0.0462498	-0.0330653	0.0649615	-0.147796	-0.0137949	-0.0783302	0.00219106	turquoise	C3orf62
ENSG00000141424.11	0.166001	0.0432364	-0.0239405	-0.0628066	0.125663	-0.131481	-0.164155	-0.0773925	0.04841	turquoise	ZNF860
ENSG00000141449.13	0.0723985	-0.0799477	-0.231827	-0.220015	-0.300279	0.0326451	-0.170119	0.333754	0.18661	blue	ACSL5
ENSG00000141504.10	-0.0470654	-0.0338657	-0.134881	0.0251487	-0.0659064	-0.0120058	-0.14782	0.0882818	0.0413129	blue	CBX6
ENSG00000141522.10	0.17004	-0.0182511	-0.0292873	0.0559794	0.313887	-0.0448054	0.0206105	-0.240523	0.00115836	turquoise	CACNA1H
ENSG00000141524.14	-0.215109	-0.212	-0.239641	-0.108727	-0.201968	0.448076	0.214868	0.160563	0.102788	brown	MFSD14C
ENSG00000141543.8	0.0548826	-0.0102169	0.0752322	0.146319	0.312956	-0.120105	-0.0711315	-0.238545	0.0178859	turquoise	PPP1R26
ENSG00000141556.19	-0.226229	-0.0188793	-0.0445044	0.03943	-0.0140747	0.246514	0.243275	-0.00158889	0.110916	red	NF1
ENSG00000141568.18	0.0284737	0.0227963	-0.0555685	-0.00474861	-0.11357	-0.0418232	-0.110735	0.129656	0.261152	yellow	PDXDC2P
ENSG00000141646.12	-0.0837122	-0.103089	-0.157483	-0.229978	-0.253788	0.0501304	-0.145595	0.274154	0.0254245	blue	C5orf42
ENSG00000141698.15	0.0161762	0.254896	-0.0214474	0.103248	0.149514	-0.0608934	0.119879	-0.185896	-0.0394683	turquoise	LRCH3
ENSG00000141736.12	-0.220158	-0.11056	-0.0593855	-0.0345105	-0.1713	0.304953	0.193721	0.131675	0.0371652	brown	DRG1
ENSG00000141738.12	-0.0933163	-0.00809928	-0.147883	-0.060926	-0.144879	0.0753765	-0.116052	0.14694	-0.0255572	blue	YTHDF3
ENSG00000141756.17	-0.142459	-0.214225	-0.27722	-0.078711	-0.125597	0.237609	0.012331	0.185504	0.127243	blue	RASA3
ENSG00000141873.9	-0.06965	-0.193563	-0.0100448	-0.0152102	-0.0874923	0.0717447	-0.0536096	0.0649734	-0.169158	blue	GFPT1
ENSG00000142089.14	-0.197346	-0.190904	-0.375047	-0.0346627	-0.14936	0.478969	0.258217	0.165139	0.179348	brown	CACNA2D1
ENSG00000142156.13	-0.0925859	-0.0490807	-0.23435	-0.169152	-0.290104	0.235913	0.0631417	0.292423	0.130525	blue	EEF1A1P19
ENSG00000142192.19	-0.02633	-0.0806812	-0.252124	-0.174015	-0.289383	0.110588	-0.125943	0.313918	0.0967489	blue	N4BP2L2
ENSG00000142227.9	0.218659	0.0232579	-0.00614614	-0.0728777	0.0470648	-0.217594	-0.217251	-0.00628213	0.0447747	turquoise	CCDC7
ENSG00000142252.9	0.242453	0.316471	0.124649	0.0148276	0.198516	-0.318919	-0.0363942	-0.210959	-0.0904784	turquoise	SEC14L6
ENSG00000142327.10	-0.166472	-0.115973	-0.16282	-0.115633	-0.300724	0.238446	0.03486	0.268276	0.0922911	blue	TUBB4A
ENSG00000142507.8	0.0407587	0.315338	0.238251	0.310507	0.493933	-0.100995	0.393607	-0.449535	-0.0174199	turquoise	2017-09-15
ENSG00000142534.5	0.000383662	0.0972495	-0.240395	-0.114069	-0.191937	0.157289	0.0700718	0.227407	0.500113	yellow	FADS3
ENSG00000142541.15	-0.0756291	0.000509767	-0.268417	-0.204495	-0.251713	0.160005	0.0110371	0.257845	0.563579	yellow	APOL6
ENSG00000142599.16	-0.228072	-0.221098	-0.122853	-0.156542	-0.352331	0.143875	-0.143124	0.349647	0.100972	blue	TMEM132A
ENSG00000142669.12	0.0409644	0.208606	0.061428	0.148771	0.547668	0.116908	0.495343	-0.531661	-0.1213	turquoise	ANGEL1
ENSG00000142676.11	-0.284373	-0.45077	-0.280794	-0.0403056	-0.136156	0.335991	0.061041	0.216417	0.534087	yellow	LARS2
ENSG00000142765.16	-0.268828	-0.0941715	-0.196031	0.0234929	-0.126549	0.421237	0.343267	0.0780524	-0.0153414	brown	ZMYND11
ENSG00000142794.17	-0.0549835	0.088994	0.100953	0.0882931	0.13877	0.0812284	0.261681	-0.207169	-0.134901	turquoise	FYN
ENSG00000142798.15	-0.308933	-0.319699	-0.259841	-0.08078	-0.277538	0.47954	0.164955	0.293497	0.128357	brown	LYPLA2
ENSG00000142867.11	0.372532	0.181505	0.189111	0.13617	0.361437	-0.356509	-0.179597	-0.284199	-0.156171	turquoise	GATB
ENSG00000142871.14	0.59357	0.234268	-0.0577578	0.226935	0.271588	-0.184806	0.0799987	-0.273709	0.0562317	black	DNAJC25
ENSG00000142892.13	0.0694969	0.0208071	0.287069	0.101707	0.3352	-0.175853	0.0829867	-0.341055	-0.262305	turquoise	MTA3
ENSG00000142910.14	0.0757455	0.189583	0.0339646	0.139184	0.0371765	0.132334	0.341619	-0.108276	0.0761112	red	SNAPC1
ENSG00000142937.10	-0.142773	-0.0793869	-0.203926	-0.0596184	-0.451042	0.127126	-0.035535	0.435588	0.608353	yellow	OFD1
ENSG00000142949.15	-0.227809	-0.254701	-0.199674	0.0177346	-0.18284	0.505338	0.388818	0.188182	0.204049	brown	RETSAT
ENSG00000143036.15	-0.157208	-0.258736	-0.177771	-0.106332	-0.0890012	0.175487	-0.0448274	0.117794	-0.0926117	blue	HAGH
ENSG00000143061.16	-0.233887	-0.167232	-0.202213	-0.100985	-0.259632	0.336865	0.169604	0.280651	0.0623832	brown	PFKP
ENSG00000143106.11	-0.142129	0.0144048	0.168834	0.223677	0.469468	0.0554456	0.379608	-0.440189	-0.0864331	turquoise	WDR18
ENSG00000143126.7	-0.18521	-0.11075	-0.0560115	-0.134356	-0.353682	0.217357	0.0221986	0.31697	0.0878012	blue	OAT
ENSG00000143153.11	0.168067	0.283795	0.0178936	0.0177587	0.0566837	-0.148804	0.0179446	-0.0691992	0.0350542	pink	GPATCH1
ENSG00000143156.12	0.06847	0.0612101	0.111354	0.255256	0.447725	-0.0651513	0.222714	-0.435757	-0.225144	turquoise	NT5C2
ENSG00000143183.15	-0.0478629	-0.0855256	0.068773	0.0297461	0.210376	-0.0968023	-0.0239637	-0.157729	-0.170935	turquoise	BAZ2A
ENSG00000143217.8	-0.258493	-0.249382	-0.312941	-0.251353	-0.198004	0.331136	0.0377689	0.225772	0.0316981	brown	SLC25A40
ENSG00000143252.13	0.0710101	0.294372	0.00514073	0.0882594	0.192367	0.0679025	0.358209	-0.228204	-0.0784598	turquoise	TMEM131
ENSG00000143256.4	0.31602	0.428219	0.0945657	0.0684135	0.118659	-0.335664	-0.0702668	-0.125812	0.142714	pink	ADD2
ENSG00000143294.13	0.12268	0.186046	0.0788973	0.129861	0.130391	-0.196361	-0.0440959	-0.13276	0.0848358	turquoise	NUAK1
ENSG00000143314.11	-0.0254655	0.162613	-0.0205253	0.0461983	0.111996	0.0951488	0.316457	-0.153829	-0.0112949	red	NTN4
ENSG00000143319.15	0.215693	0.151437	-0.107178	-0.0498704	0.00925404	-0.0935133	-0.168415	0.027284	0.151217	black	CA12
ENSG00000143322.18	0.391172	0.120487	0.0150736	-0.0849687	-0.148483	-0.345456	-0.394864	0.176765	0.204736	blue	LAMP3
ENSG00000143337.17	0.096485	0.165389	0.16082	0.316785	0.351717	-0.200566	0.0652974	-0.363591	-0.142349	turquoise	UBE2K
ENSG00000143353.10	-0.119152	0.00781453	0.0457373	0.126568	0.0808094	0.142972	0.305577	-0.17461	-0.148665	red	RAB10
ENSG00000143363.14	-0.111985	-0.208549	0.0849224	-0.00212276	0.0803591	0.137333	0.130203	-0.0915777	-0.125251	turquoise	PTPN3
ENSG00000143368.9	0.31144	0.322135	0.160747	0.234225	0.61318	-0.238738	0.156725	-0.621394	-0.203762	turquoise	KCNAB2
ENSG00000143374.13	-0.118483	-0.148956	0.171116	0.0357618	0.211625	0.18895	0.332382	-0.262839	-0.124017	brown	ATP1B3
ENSG00000143376.11	-0.0683995	0.000537205	-0.0111796	0.0619823	0.0482476	0.132193	0.233201	-0.105372	-0.0860152	brown	ST6GALNAC2
ENSG00000143382.12	-0.342325	-0.157805	-0.188645	-0.202604	-0.193464	0.620197	0.408667	0.175732	-0.037444	brown	PIGB
ENSG00000143401.13	0.095371	0.251071	0.679295	0.183849	0.18685	-0.301705	0.0488943	-0.271605	-0.165783	green	FUNDC1
ENSG00000143418.18	0.0276512	0.0209913	0.195554	0.0536368	0.393889	-0.139336	0.00214819	-0.347037	-0.322876	turquoise	IKBKAP
ENSG00000143429.8	-0.0267857	0.239201	-0.0736853	0.0188684	0.213083	-0.0331491	0.184167	-0.186361	0.0181344	turquoise	PRMT5
ENSG00000143436.9	0.0630791	0.161014	0.177267	0.0828469	0.423066	-0.0548177	0.285248	-0.466313	-0.162733	turquoise	PABPC1
ENSG00000143442.20	-0.126572	-0.122988	-0.133376	-0.128453	-0.362301	0.102644	-0.133766	0.354933	0.170401	blue	GBA2
ENSG00000143486.14	-0.0732659	0.0431676	0.0526411	0.0645773	0.187593	0.201747	0.415467	-0.247561	-0.0888376	red	ITGB5
ENSG00000143493.11	0.0112348	0.0586571	0.0858784	0.0391653	0.144515	-0.00635942	0.0737503	-0.165184	-0.16536	turquoise	RPS5
ENSG00000143514.15	0.268574	0.245174	0.0729563	0.0109646	-0.0384006	-0.270263	-0.252747	0.0277707	0.0529691	black	CPNE3
ENSG00000143537.12	-0.238394	-0.13418	-0.112806	0.0423356	0.0398477	0.413492	0.448378	-0.118723	-0.164152	red	MPP5
ENSG00000143569.17	0.0741301	0.112733	0.0830974	0.139953	0.341935	-0.00614691	0.189465	-0.353777	0.0973697	turquoise	RDH11
ENSG00000143570.16	0.131565	0.136477	0.129002	0.210971	0.649611	-0.0113774	0.328403	-0.632381	-0.271209	turquoise	HLTF
ENSG00000143575.13	-0.152741	-0.0859683	0.155221	0.0107095	0.284245	0.321643	0.481834	-0.312883	-0.15425	red	PRKACA
ENSG00000143614.7	0.0300305	0.104189	0.151744	-0.101312	-0.0391778	-0.104509	-0.0948391	0.0470462	-0.0368815	green	TCF3
ENSG00000143621.15	0.151413	0.0696841	0.457281	0.200996	0.589393	-0.3047	0.0133536	-0.546512	-0.205905	turquoise	WBSCR22
ENSG00000143624.12	-0.0621187	-0.109513	0.0378883	-0.0635633	0.122551	0.162359	0.179943	-0.152778	-0.0483334	turquoise	TRIP13
ENSG00000143633.11	0.0670072	0.0870956	-0.0636879	-0.10693	0.0531191	-0.19984	-0.152436	0.0171918	0.0271976	turquoise	OGFOD1
ENSG00000143653.9	0.0588289	0.037683	0.0200301	0.196839	0.321295	-0.0132488	0.208259	-0.316603	-0.0933973	turquoise	C20orf194
ENSG00000143674.9	0.0825255	0.12965	0.0335234	0.0555753	-0.0956367	-0.20515	-0.187016	0.0952534	0.0461841	blue	PTHLH
ENSG00000143702.14	0.111061	0.134216	0.127228	0.145167	0.10237	-0.138915	-0.00767553	-0.10887	-0.0274537	turquoise	DOCK3
ENSG00000143742.11	0.0591336	-0.011809	0.232589	0.223681	0.440417	-0.139523	0.0755975	-0.37004	-0.238467	turquoise	USP40
ENSG00000143771.10	0.00546672	0.1768	0.411632	0.134822	0.271618	-0.0472823	0.309955	-0.341181	-0.29555	green	TTC39A
ENSG00000143774.15	-0.322599	-0.0921602	-0.107325	-0.0348126	0.0284001	0.473518	0.518194	-0.0764943	-0.182395	brown	ZW10
ENSG00000143776.17	-0.00489775	0.0496082	0.106269	-0.0109749	-0.192181	-0.0841677	-0.0489849	0.107751	0.0102821	blue	ITPKC
ENSG00000143811.15	-0.0368917	0.167597	-0.0314148	-0.0436528	-0.185068	-0.0480258	0.0628459	0.10941	-0.0076729	blue	DNAJA1
ENSG00000143815.13	-0.0238743	0.0905151	0.434261	0.151168	0.143912	-0.156929	0.0959518	-0.178121	-0.152673	green	CHERP
ENSG00000143845.13	0.0965896	0.167121	0.0160943	0.0500908	0.188677	-0.029092	0.194646	-0.181967	-0.0852311	turquoise	ZNF510
ENSG00000143850.11	0.251408	0.222001	-0.0570248	0.045786	0.0042155	-0.0743027	0.100451	-0.0365775	0.0536345	black	ZNF506
ENSG00000143870.11	-0.0505775	0.127245	0.072197	0.2759	0.552356	0.0550528	0.406481	-0.537661	-0.22653	turquoise	RBM41
ENSG00000143878.9	0.294988	0.197973	-0.162143	0.012574	-0.112604	-0.24855	-0.218672	0.156995	0.257952	yellow	NUDC
ENSG00000143889.14	0.227394	0.0483393	0.133943	0.131661	0.124271	-0.104801	-0.107625	-0.0999609	-0.0179118	turquoise	DFNB31
ENSG00000143919.13	-0.0305846	0.104097	0.0325472	0.120204	0.196783	0.115776	0.280332	-0.231252	-0.150975	turquoise	HNRNPH3
ENSG00000143933.15	0.0757414	0.142191	0.690392	0.245889	0.376881	-0.242971	0.132594	-0.44196	-0.4133	green	PRTFDC1
ENSG00000143942.4	0.357383	0.30659	0.24153	0.20788	0.367707	-0.322802	-0.0567366	-0.356846	-0.124036	turquoise	PSMD8
ENSG00000143970.15	-0.0248158	-0.175775	-0.061401	-0.159816	-0.316595	-0.00690506	-0.225702	0.337492	0.133192	blue	TNRC6A
ENSG00000143977.12	-0.0581647	0.250071	0.288264	0.172015	0.133916	-0.067741	0.242861	-0.169672	0.0559325	green	TRIOBP
ENSG00000144034.13	0.0717371	-0.0431749	0.436065	0.0535592	0.305615	-0.261543	-0.161817	-0.258217	-0.0385202	green	GTPBP1
ENSG00000144040.11	-0.0851313	0.123185	0.12574	0.0213683	0.0356435	0.0608523	0.154504	-0.090088	-0.0734587	turquoise	HSCB
ENSG00000144048.9	0.196792	0.0649731	0.143854	0.194044	0.438446	-0.162211	0.0483046	-0.413535	-0.209071	turquoise	POLDIP3
ENSG00000144063.3	0.205713	0.137895	-0.0621161	-0.0680922	-0.00465234	-0.0494396	-0.0522563	0.0354536	0.175878	yellow	NFKBIA
ENSG00000144118.12	0.111437	0.0163878	0.121279	0.215799	0.27935	-0.0536703	0.068625	-0.260221	-0.199557	turquoise	PRELID3B
ENSG00000144161.11	0.0195045	-0.130581	-0.261208	-0.171507	-0.341663	-0.00318591	-0.228744	0.361993	0.133649	blue	GSS
ENSG00000144233.8	0.139986	-0.0308511	-0.137278	-0.0828634	-0.111342	-0.103795	-0.282083	0.164115	0.0956245	blue	RNF24
ENSG00000144320.12	0.104863	0.148145	0.114604	0.102874	0.102557	-0.188192	0.0230777	-0.142717	-0.221664	turquoise	FGD1
ENSG00000144381.15	0.249543	0.203054	0.126841	0.169311	0.1348	-0.265224	-0.0715773	-0.10871	0.21428	turquoise	SETD6
ENSG00000144559.9	-0.085949	-0.10402	0.0187414	0.0529619	0.130993	0.0957479	0.0440336	-0.101939	0.0389624	turquoise	CACTIN
ENSG00000144560.12	-0.0960563	-0.221052	-0.205188	-0.209773	-0.0848065	0.129604	-0.109395	0.112986	0.19042	yellow	APLP1
ENSG00000144566.9	0.188324	-0.110448	0.110544	0.130976	0.280925	-0.115892	-0.102436	-0.259979	-0.112096	turquoise	PPP2R1A
ENSG00000144567.9	-0.283714	-0.213581	-0.0188481	-0.138121	-0.196716	0.152158	0.0124453	0.173615	-0.0897501	blue	TMEM87A
ENSG00000144597.12	0.0343249	-0.0983123	0.0433254	0.0616305	0.228482	-0.150154	-0.193999	-0.169501	-0.158651	turquoise	ZNF175
ENSG00000144635.7	0.172846	0.0545265	0.0860113	0.166697	0.347864	-0.215911	-0.0834631	-0.302454	0.000494607	turquoise	HPN
ENSG00000144659.9	0.0928135	-0.00434382	0.0124652	-0.0517979	0.0365511	-0.158335	-0.22513	-0.0183308	0.0499509	turquoise	STEAP1B
ENSG00000144713.11	-0.162514	-0.339828	-0.303376	-0.166003	-0.23457	0.149826	-0.22057	0.338543	0.565419	yellow	RPS19
ENSG00000144736.12	0.234797	0.080694	-0.000344933	0.0459296	0.12281	-0.217356	-0.202951	-0.0930404	0.0846526	turquoise	BCCIP
ENSG00000144744.15	0.139414	0.0527591	0.0899551	0.227627	0.375665	-0.0476093	0.214143	-0.331718	-0.181763	turquoise	CUEDC2
ENSG00000144848.9	0.091122	0.0564535	0.15805	0.149202	0.401013	-0.125808	0.028049	-0.351346	-0.183261	turquoise	RASD1
ENSG00000144867.10	0.276704	0.179586	0.00550916	0.10059	0.200376	-0.257299	-0.161522	-0.177739	0.0631592	turquoise	WHSC1
ENSG00000144895.10	0.174693	0.0705942	0.193718	0.202837	0.325917	-0.249899	0.0115228	-0.307488	-0.0220855	turquoise	UBE4A
ENSG00000144959.8	0.303536	0.108071	0.326702	0.253819	0.352756	-0.210645	0.0717199	-0.364541	-0.218989	turquoise	ELK3
ENSG00000145012.11	-0.0777703	-0.215908	-0.194621	0.15348	-0.243779	0.267036	0.129132	0.236043	0.0845937	blue	SUDS3
ENSG00000145220.12	0.217373	0.0726538	0.454968	0.0834569	0.13611	-0.339014	-0.238356	-0.117603	0.13597	green	ARFGEF3
ENSG00000145247.10	0.191724	0.0800977	0.0512451	-0.00919571	0.262792	-0.0590307	-0.00227041	-0.243915	-0.108304	turquoise	TRAPPC13
ENSG00000145284.10	-0.0684098	-0.0455333	-0.161828	-0.164837	-0.295045	0.0805722	-0.105808	0.311748	0.162125	blue	PODXL2
ENSG00000145287.9	0.339406	0.204128	0.00249482	0.320569	0.246003	-0.0945261	0.0122058	-0.236261	0.145672	black	CISH
ENSG00000145354.8	0.34095	0.221747	0.391944	0.168293	0.364936	-0.431085	-0.122164	-0.336308	-0.160612	green	TANC1
ENSG00000145425.8	0.372672	0.301471	-0.0566852	0.209655	0.15653	-0.283405	-0.0916171	-0.111847	0.523696	yellow	THADA
ENSG00000145495.13	0.0424276	0.00774236	0.027807	0.020906	0.0578089	0.114494	0.264873	-0.12153	-0.195076	red	MYCL
ENSG00000145545.10	-0.0115914	-0.0355889	-0.0340414	-0.0387249	0.169979	0.170202	0.209871	-0.156832	-0.140327	turquoise	TSNAX
ENSG00000145632.13	0.378276	0.121758	0.0711777	0.15574	0.272851	-0.209504	0.0214328	-0.278121	-0.0436231	black	ATF6
ENSG00000145715.13	-0.177869	-0.0428831	-0.0234625	-0.0812249	-0.153551	0.0918793	0.0349604	0.145958	-0.0739242	blue	BBOF1
ENSG00000145725.18	-0.0746745	-0.0489444	0.0583128	0.0184535	-0.0939051	0.010452	0.0337915	0.0630389	-0.0847111	blue	ATAD2B
ENSG00000145734.17	0.0779864	-0.0479227	-0.0736415	-0.0336877	-0.292766	-0.136337	-0.323054	0.307875	0.281694	blue	UBN1
ENSG00000145741.14	0.181676	0.0244756	-0.110369	0.140246	0.41767	-0.096185	-0.0194503	-0.251262	0.16926	turquoise	DNAH7
ENSG00000145782.11	0.196091	0.225826	0.227429	0.0315625	0.0627793	-0.297472	-0.171967	-0.0621981	-0.154417	green	C10orf88
ENSG00000145824.11	-0.141674	-0.0587075	-0.103566	-0.226871	-0.352277	0.129528	-0.0593581	0.354222	0.0858655	blue	TMPO
ENSG00000145833.14	0.15014	0.0982106	-0.112007	0.0208284	-0.121252	-0.163864	-0.178085	0.125811	0.248068	yellow	PAIP2
ENSG00000145901.13	-0.00178888	-0.0728574	-0.0923767	-0.220868	-0.383745	-0.0230645	-0.288839	0.388491	0.160908	blue	SPATA1
ENSG00000145916.17	-0.154684	-0.0407067	-0.0500331	-0.032311	0.0572717	0.157851	0.222033	-0.0775356	-0.151368	turquoise	KBTBD4
ENSG00000146007.9	-0.168248	-0.116354	-0.123692	-0.146556	-0.386549	0.0564433	-0.164004	0.362172	0.199243	blue	TRMT1L
ENSG00000146067.14	-0.139222	-0.0490315	-0.226565	-0.161984	-0.411786	0.116947	-0.177038	0.390824	0.105166	blue	IKZF4
ENSG00000146072.6	0.113668	-0.0667727	-0.0450576	0.180495	0.231211	0.177391	0.308366	-0.230764	-0.142438	brown	ZFP36
ENSG00000146109.4	0.201929	0.145855	0.0759269	0.10936	0.375859	-0.167876	0.0198116	-0.347398	-0.117829	turquoise	DOK4
ENSG00000146112.10	0.0448417	0.152024	-0.167909	-0.119822	-0.293993	-0.100687	-0.183442	0.331515	0.175367	blue	FOSB
ENSG00000146247.13	-0.196694	-0.155362	0.11178	-0.175805	-0.243472	0.123695	0.0504391	0.187771	0.0862414	blue	HERC2
ENSG00000146282.16	-0.0273363	-0.0129488	0.186797	0.160148	0.0931064	-0.0686354	0.00292118	-0.13164	-0.141859	turquoise	PSMA1
ENSG00000146350.12	-0.134576	-0.134785	-0.108698	-0.159499	-0.340017	0.0738799	-0.116877	0.347944	0.105257	blue	NSUN5
ENSG00000146425.9	-0.0898805	0.015153	0.0664208	0.0806809	0.291262	0.143573	0.351835	-0.305066	-0.230156	turquoise	COX4I1
ENSG00000146457.13	0.140946	0.102569	0.167939	-0.00499899	0.0933523	-0.182565	-0.0604311	-0.0839253	-0.0760072	turquoise	COX7B
ENSG00000146476.9	0.238827	0.175634	0.109989	0.0942393	0.331972	-0.194513	0.0170478	-0.321534	-0.294357	turquoise	SLC35D2
ENSG00000146530.10	-0.164222	-0.186175	-0.216626	-0.194336	-0.246544	0.151279	-0.0952234	0.279495	0.0605302	blue	TIMM10B
ENSG00000146540.13	-0.301692	-0.225651	0.00418917	0.087875	0.175348	0.38512	0.420368	-0.171281	-0.0770199	red	EXOC4
ENSG00000146555.17	-0.160569	-0.0413109	-0.16365	-0.0929071	-0.244609	0.233773	0.149806	0.210623	-0.0111772	brown	PRKAB2
ENSG00000146574.14	0.129115	0.331678	-0.0670458	-0.0223457	0.00923933	-0.178746	-0.0175946	-0.00155112	-0.0127406	pink	RAF1
ENSG00000146576.11	-0.0517099	-0.00301434	-0.286572	-0.152906	-0.34457	0.068235	-0.156374	0.353993	0.199775	blue	SPATA6
ENSG00000146587.16	0.0626509	0.0411912	0.0209435	-0.189115	-0.140529	-0.144897	-0.253009	0.164614	0.0230994	blue	ZNF132
ENSG00000146676.6	0.0031834	-0.105793	-0.148535	-0.140504	-0.326198	-0.0474492	-0.227405	0.370729	0.296304	blue	PDZD2
ENSG00000146729.8	-0.0939978	-0.104528	0.0103881	0.256515	0.20726	0.298292	0.505502	-0.223074	-0.191121	red	IMPA1
ENSG00000146731.9	0.345833	0.013436	0.22949	0.100508	0.292246	-0.347842	-0.120238	-0.256103	0.0809446	turquoise	CCDC59
ENSG00000146830.9	0.0584707	0.423191	-0.124972	-0.00384884	-0.0830607	-0.0208749	0.158896	0.0116405	-0.0787877	pink	NAT10
ENSG00000146833.14	-0.154265	-0.164855	-0.0905347	0.0781258	-0.0944459	0.121779	0.0770936	0.106113	-0.0118673	blue	DTX1
ENSG00000146918.18	0.0200082	0.103213	0.511028	0.198229	0.276916	-0.136584	0.183304	-0.364509	-0.290095	green	CNPY3
ENSG00000147130.13	-0.208933	-0.142492	-0.191056	-0.155536	-0.158347	0.282202	0.121993	0.18452	0.117186	brown	ZBTB8B
ENSG00000147224.9	0.186109	0.170135	0.231938	0.13451	0.30778	-0.305951	-0.0936123	-0.2886	-0.179681	turquoise	PIP4K2B
ENSG00000147316.11	0.193569	-0.0247816	-0.0735389	-0.03349	-0.030998	-0.0877924	-0.215401	0.0574491	0.0907419	black	TJAP1
ENSG00000147416.9	0.0544479	0.120791	0.12016	0.160259	0.239693	-0.128692	0.043084	-0.24806	-0.0361293	turquoise	TGS1
ENSG00000147439.10	0.187801	0.0663398	0.0394236	0.0955561	0.216363	-0.0755951	-0.00995213	-0.231231	-0.0868061	turquoise	MMP13
ENSG00000147454.12	-0.0122587	-0.16189	-0.328628	-0.212842	-0.336097	0.228055	-0.0195037	0.342695	0.288749	blue	KIF23
ENSG00000147457.12	0.166362	0.119711	0.251906	0.0642077	0.222807	-0.157415	0.0181251	-0.263626	-0.106808	turquoise	THBS1
ENSG00000147475.13	-0.151625	-0.078436	-0.169643	-0.141315	-0.23459	0.173844	0.0938638	0.243492	0.161468	blue	ATRAID
ENSG00000147509.12	0.223277	0.192968	0.040723	0.0515173	0.113971	-0.220673	-0.143875	-0.100904	0.000760984	turquoise	ITGAV
ENSG00000147592.7	0.0690016	0.110197	0.0663014	0.0641386	0.120539	-0.11954	-0.0693605	-0.119906	-0.0794705	turquoise	SCARB2
ENSG00000147604.12	0.319088	0.607836	0.206969	0.31675	0.497822	-0.433603	0.0730338	-0.478385	0.145578	turquoise	CNOT6L
ENSG00000147642.15	-0.342696	-0.115323	-0.0401972	0.030673	-0.0560814	0.277526	0.199798	0.0421417	0.00770285	brown	RAB20
ENSG00000147650.10	0.21675	0.171302	-0.0185943	-0.0315162	-0.0225582	-0.20707	-0.188662	0.0304123	0.0762919	black	VPS33A
ENSG00000147669.9	0.0433687	0.150531	0.247345	0.111214	0.375029	-0.16354	0.0838489	-0.341484	-0.0554194	turquoise	TARBP2
ENSG00000147679.10	0.0734778	-0.022886	0.0243351	-0.0510549	-0.0410924	-0.216629	-0.263215	0.0927966	0.173878	yellow	CDH24
ENSG00000147684.6	0.152663	0.279607	0.0228371	0.256492	0.276137	-0.171647	0.0939809	-0.258872	0.186482	turquoise	ZSCAN29
ENSG00000147689.15	0.0853157	0.0340684	-0.0855745	-0.0962462	-0.0415873	-0.0386415	-0.129849	0.0451787	0.11684	yellow	SLC24A4
ENSG00000147813.14	-0.162058	-0.138261	-0.0713886	-0.0372298	0.126047	0.265247	0.278091	-0.120257	0.05365	red	EFTUD1
ENSG00000147862.13	0.0397922	0.0881251	0.0567723	0.271626	0.0935853	0.00976845	0.158393	-0.144297	-0.0821026	magenta	GALNT1
ENSG00000147872.8	0.140958	-0.0293414	0.053485	0.119427	0.13685	-0.226495	-0.261453	-0.107705	0.0472574	turquoise	MINK1
ENSG00000147883.10	-0.134431	-0.139214	-0.0582526	-0.0783899	-0.145973	0.184951	0.0507656	0.150376	-0.0885684	blue	FN3KRP
ENSG00000147905.16	-0.212315	-0.229287	-0.138213	-0.186742	-0.170688	0.150329	-0.0233487	0.19483	0.0362727	brown	ZNF473
ENSG00000147996.15	0.209997	0.313589	-0.103536	-0.021331	-0.00575646	-0.214684	-0.112799	0.0252702	0.147336	pink	MAP3K6
ENSG00000148120.13	0.0756796	-0.0212662	-0.0351524	0.0585863	0.0122101	0.0833953	0.13147	-0.0225697	-0.219702	turquoise	ANXA9
ENSG00000148158.15	-0.178482	-0.162074	-0.180111	-0.128798	-0.188926	0.0661536	-0.0879054	0.215862	-0.030106	blue	ETNK2
ENSG00000148180.15	-0.338536	-0.346599	-0.327227	-0.307967	-0.201741	0.498274	0.120378	0.227706	-0.0621011	brown	ZC3H8
ENSG00000148218.14	-0.0299329	0.127729	0.20709	-0.0147343	0.191236	0.000258442	0.181353	-0.224661	-0.196958	turquoise	CHAC2
ENSG00000148219.15	-0.261523	-0.297276	-0.324493	-0.28688	-0.532959	0.201196	-0.155334	0.55413	0.129978	blue	ANKRD53
ENSG00000148248.12	0.0146079	0.0376374	-0.0626397	0.426102	0.395795	0.0731814	0.275103	-0.355248	-0.0411964	turquoise	BDP1
ENSG00000148290.8	-0.11057	0.0224155	-0.105621	0.0614181	-0.165505	0.0715416	0.0807432	0.144396	0.138505	yellow	PPIP5K2
ENSG00000148291.8	0.142164	0.186757	0.0115547	0.234597	0.0888326	-0.206818	-0.0465706	-0.100987	0.0834564	magenta	PAM
ENSG00000148296.6	0.109386	0.16901	-0.182275	0.0784696	-0.0598927	-0.0409825	-0.0241064	0.0534288	0.265522	yellow	ANKRD31
ENSG00000148297.14	0.0749195	0.0662753	-0.148131	0.0679716	-0.223951	0.0287585	-0.0726857	0.207822	0.27326	yellow	RASA1
ENSG00000148300.10	0.103422	0.168543	-0.0172524	0.186279	-0.118302	-0.164728	-0.171067	0.115106	0.248371	yellow	GTF2H2
ENSG00000148303.15	-0.0969524	0.133745	-0.172449	0.148375	-0.265366	0.074433	0.0846622	0.248629	0.581846	yellow	GIN1
ENSG00000148334.13	0.146044	0.414052	0.141735	0.125642	0.0901959	-0.164998	0.138227	-0.134007	0.147033	pink	ARL6IP5
ENSG00000148344.10	0.206273	0.0334865	-0.0148067	0.0818017	0.193884	-0.0535004	0.00110778	-0.181695	0.102033	turquoise	PLAC8
ENSG00000148346.10	-0.0566743	-0.240016	-0.120208	-0.0178897	-0.141668	0.171704	-0.0389701	0.144744	-0.0674614	blue	TMF1
ENSG00000148356.12	-0.184237	-0.22311	-0.078119	-0.0245215	-0.19049	0.124184	-0.0255417	0.222261	0.126428	blue	GMPPA
ENSG00000148358.18	-0.230875	-0.0774433	-0.131639	-0.103878	-0.417257	0.130013	-0.0971304	0.409664	0.159761	blue	CAMK2D
ENSG00000148411.6	-0.270206	-0.156696	-0.0769274	-0.00992823	-0.313375	0.197592	0.0236185	0.299624	0.081043	blue	NHP2
ENSG00000148484.16	0.182301	0.15097	0.165241	0.199966	0.467662	-0.0664977	0.369042	-0.471848	-0.198942	turquoise	RBMX
ENSG00000148572.13	0.142424	0.146224	0.140554	0.46316	0.186564	-0.253631	-0.0859432	-0.229416	-0.171707	magenta	ADM
ENSG00000148634.14	0.0743551	0.0600731	0.0500416	0.750542	0.0600895	-0.00972402	0.137363	-0.121193	0.0236263	magenta	TUT1
ENSG00000148677.6	0.392976	0.28532	-0.0470079	-0.0199318	-0.0171566	-0.225637	-0.0738629	0.00598974	-0.0162911	black	BTBD11
ENSG00000148803.10	-0.0640985	-0.0781341	-0.073489	0.091766	0.230907	0.231437	0.381654	-0.223616	-0.130449	red	CEBPG
ENSG00000148840.9	0.0713424	-0.0691756	-0.12728	-0.0474358	-0.15135	-0.00945228	-0.171847	0.197261	0.183324	blue	HSPB8
ENSG00000148925.9	0.141742	0.075656	0.0863825	0.0909192	0.278749	-0.149827	-0.0301308	-0.245621	-0.058901	turquoise	HSPA13
ENSG00000148943.10	0.306675	0.212145	0.205965	0.279425	0.388063	-0.327149	-0.104606	-0.352148	-0.134546	turquoise	SLC26A2
ENSG00000148950.8	0.0760297	0.000272347	0.0596489	-0.166933	-0.0888903	-0.213642	-0.262576	0.148872	0.0714173	blue	RMND1
ENSG00000149043.15	-0.202418	-0.0140683	-0.144365	-0.128263	-0.292256	0.298477	0.137377	0.200301	-0.0544054	brown	FAM167A
ENSG00000149084.10	0.171292	0.067951	0.0985964	0.116607	0.187741	-0.187809	-0.13485	-0.189492	-0.0645886	turquoise	PCGF6
ENSG00000149089.11	0.108255	0.0458586	0.132743	0.154028	0.249488	-0.18514	-0.0895621	-0.219625	-0.0908918	turquoise	N6AMT1
ENSG00000149100.11	0.14281	0.0184526	0.090535	0.193097	0.314256	-0.222233	-0.124515	-0.265252	0.132973	turquoise	PSD3
ENSG00000149115.12	-0.116404	-0.0660521	-0.31396	-0.170731	-0.376052	0.23515	-0.0371857	0.375345	0.155139	blue	MFSD14A
ENSG00000149218.4	-0.174302	-0.108921	-0.274446	-0.23827	-0.290359	0.195622	0.053637	0.287656	0.158326	blue	FLAD1
ENSG00000149257.12	-0.217393	-0.31832	-0.141525	-0.13264	-0.0643421	0.329394	0.00533757	0.102092	0.133297	brown	ATAD3B
ENSG00000149260.13	-0.203384	-0.0482606	-0.173268	-0.068184	-0.0764035	0.234842	0.179555	0.0643639	-0.0741044	red	TMPRSS3
ENSG00000149357.8	-0.0742066	0.0510572	0.176629	0.218143	0.614029	0.0991415	0.435565	-0.585094	-0.198602	turquoise	AMFR
ENSG00000149418.9	-0.278801	-0.253025	-0.236784	-0.238949	-0.392923	0.491632	0.157103	0.352452	0.134086	brown	USP1
ENSG00000149428.17	-0.125786	0.0153553	-0.0718277	-0.0954697	-0.0615532	0.208086	0.223495	0.0371288	0.0271127	red	TBC1D24
ENSG00000149485.15	0.176809	0.267257	0.125825	0.00481699	0.284737	-0.173219	0.152991	-0.308714	-0.163598	turquoise	DHRS1
ENSG00000149531.13	-0.134192	-0.048232	-0.29936	-0.168762	-0.340123	0.0383258	-0.17142	0.328861	0.0838696	blue	FLJ22447
ENSG00000149591.15	-0.135244	-0.214573	-0.0963775	-0.0895767	-0.0291024	0.254524	0.143062	0.0679781	-0.104221	blue	MPP3
ENSG00000149639.13	-0.259753	-0.290696	0.123277	-0.0594936	-0.213215	0.16164	-0.048142	0.183622	0.0226176	blue	ANKRD65
ENSG00000149792.7	0.0458556	0.0978106	0.146549	0.143355	0.349616	-0.0644549	0.179694	-0.353999	-0.255319	turquoise	EYA3
ENSG00000149806.9	0.00896323	-0.029139	-0.172867	-0.153202	-0.0208545	-0.00758923	-0.181397	0.122363	0.349189	yellow	XKR8
ENSG00000149923.12	0.135941	0.369271	0.142529	0.202893	0.308127	-0.145228	0.205324	-0.336963	0.0864482	turquoise	OPLAH
ENSG00000150093.17	0.195906	0.131655	0.127765	0.0352066	0.142053	-0.129336	0.0578819	-0.150191	-0.248408	turquoise	CDKN2A
ENSG00000150456.9	0.0234441	-0.062708	-0.0150142	0.000526624	0.0425248	-0.0598118	-0.0826356	-0.0381687	0.0919767	turquoise	TSC22D4
ENSG00000150459.11	0.084032	0.122957	0.246389	0.136583	0.185012	-0.30602	-0.242821	-0.139243	0.0127164	turquoise	SMAD3
ENSG00000150477.13	-0.0865742	-0.0482506	-0.268554	-0.271338	-0.470568	-0.0232893	-0.297567	0.489599	0.175643	blue	IPP
ENSG00000150556.15	0.077314	0.109914	0.136637	0.181025	0.119104	0.10722	0.23091	-0.187637	-0.197453	turquoise	CST3
ENSG00000150593.14	7.86171e-05	-0.166332	-0.0774068	-0.153799	-0.108309	0.0072354	-0.229706	0.144703	-0.0559757	blue	PFKM
ENSG00000150753.10	0.191629	0.0528162	0.370438	0.290277	0.709975	-0.141191	0.289637	-0.664774	-0.0899123	turquoise	HPCAL4
ENSG00000150768.14	0.0362904	0.0779972	0.197883	0.141144	0.306169	-0.133644	0.0532602	-0.299378	-0.151412	turquoise	DVL3
ENSG00000150776.16	0.0850999	0.0449783	0.00132876	-0.185392	-0.214437	-0.176911	-0.363959	0.261364	0.173235	blue	ABCF3
ENSG00000150779.10	0.155767	0.227426	-0.00164796	0.066681	0.175089	-0.0764597	0.0462984	-0.130099	0.0976951	pink	PCYT1A
ENSG00000150787.6	0.168037	0.195811	0.314854	0.18667	0.303567	-0.260772	-0.0755859	-0.281863	-0.156249	turquoise	BDH1
ENSG00000150938.8	-0.0447797	-0.205204	-0.0490464	-0.136552	-0.393237	0.18764	0.0161613	0.400994	0.0940248	blue	AAAS
ENSG00000150991.13	-0.370867	-0.397348	0.0476325	-0.00929998	0.123488	0.393137	0.240902	-0.162793	-0.386656	brown	SLFN5
ENSG00000151014.5	0.285954	0.311152	-0.0373965	-0.00721246	-0.00333475	-0.260478	-0.164781	0.0154829	0.120961	pink	HDLBP
ENSG00000151065.12	-0.0828115	-0.178784	-0.175938	-0.063764	-0.0739435	0.16286	0.0228725	0.106792	-0.0529118	blue	DDR2
ENSG00000151131.8	0.150668	0.26908	0.141062	0.0198411	0.203388	-0.242823	-0.107482	-0.163068	0.128959	turquoise	GHITM
ENSG00000151176.6	-0.0370805	0.0157366	-0.198416	-0.11535	-0.18289	0.26655	0.183548	0.196199	0.0559398	blue	HIF1AN
ENSG00000151208.15	-0.106085	-0.139445	-0.162937	0.240637	-0.110229	0.153137	0.0377498	0.0980927	0.0311264	magenta	DCUN1D2
ENSG00000151240.14	-0.0161615	-0.0628449	-0.11113	-0.0500393	-0.238528	-0.0193808	-0.202702	0.260694	0.123221	blue	VWDE
ENSG00000151247.11	0.178618	0.0365676	0.370398	0.15303	0.44781	-0.168592	0.0537505	-0.451999	-0.23524	turquoise	KCNIP3
ENSG00000151287.15	0.0747756	0.0504507	0.507722	0.206953	0.469921	-0.206216	0.133841	-0.476393	-0.356036	green	THAP9
ENSG00000151338.17	-0.11134	-0.157319	-0.0651756	-0.153469	-0.295197	0.0625307	-0.120088	0.294025	0.155128	blue	TBC1D10B
ENSG00000151414.13	0.2266	0.152885	0.151842	0.0833804	0.165367	-0.247442	-0.128483	-0.152839	-0.069584	turquoise	DNM2
ENSG00000151465.12	0.215194	0.23283	0.225444	0.303193	0.548791	-0.193973	0.13087	-0.528302	-0.149709	turquoise	MSN
ENSG00000151491.11	0.01214	0.120085	0.207471	0.180647	0.132904	-0.0937823	0.0735159	-0.187584	-0.215891	turquoise	TGFBR2
ENSG00000151612.14	-0.00335328	-0.103869	-0.270823	-0.0914062	-0.250621	0.124492	-0.0895071	0.281861	0.202488	blue	WIPF1
ENSG00000151651.14	-0.104137	-0.182877	-0.218841	-0.113456	-0.233067	0.260464	0.00994754	0.221813	-0.0546813	blue	CMIP
ENSG00000151690.13	-0.133548	-0.107827	-0.0799149	-0.109969	-0.279991	0.0624753	-0.126128	0.286335	0.042121	blue	LONP2
ENSG00000151779.11	-0.251161	-0.202335	-0.17109	-0.0634968	-0.25678	0.338254	0.182426	0.210261	0.0658636	brown	NECAP1
ENSG00000151806.12	0.103674	0.0558158	0.0613107	-0.0140254	0.039348	-0.162981	-0.164193	-0.0339574	0.0114123	turquoise	BRIX1
ENSG00000151881.13	0.270052	0.143745	0.261332	0.0772731	0.362491	-0.231982	0.0565883	-0.367407	-0.200295	turquoise	STMN1
ENSG00000151892.13	0.0588063	0.0580197	0.05158	0.12069	0.050559	-0.0103293	0.131693	-0.076688	-0.116758	brown	HNRNPDL
ENSG00000151893.13	0.0294609	0.0841256	0.277844	0.152151	0.258033	-0.0572753	0.165934	-0.28976	-0.190342	turquoise	MED21
ENSG00000151914.16	0.0325635	-0.0758228	-0.0722273	-0.119878	-0.366815	0.0773364	-0.0488619	0.333774	0.0714688	blue	RAC2
ENSG00000151917.16	0.0809017	0.0992018	-0.00549012	-0.0243384	-0.0937077	-0.0799653	-0.0830928	0.0971665	0.0996265	blue	LIF
ENSG00000151929.8	0.124081	0.108135	-0.0347885	-0.0820942	-0.0944749	-0.0740975	-0.13545	0.129765	0.118642	blue	CENPH
ENSG00000152061.20	-0.226172	-0.118711	-0.109786	-0.145646	-0.29534	0.188693	-0.0357605	0.246927	0.017381	blue	SIRT6
ENSG00000152102.16	0.14134	0.00970653	0.029043	-0.0514689	-0.026438	-0.128332	-0.186941	0.0467677	0.072088	turquoise	SEC23B
ENSG00000152234.14	0.0149891	0.120543	0.00707894	0.113965	0.361565	0.111252	0.444661	-0.378819	-0.0291984	turquoise	PDGFA
ENSG00000152253.7	-0.11248	0.0785184	0.759267	0.090798	0.130518	-0.240106	0.00416163	-0.251718	-0.346596	green	SRPX
ENSG00000152256.12	0.0832457	0.0089269	-0.121335	-0.094397	-0.151415	-0.0358636	-0.170552	0.171567	0.0480638	blue	PHEX
ENSG00000152284.4	-0.178602	-0.0505915	-0.110323	-0.170268	-0.394775	0.261669	0.0318072	0.374674	0.110657	blue	TXN2
ENSG00000152291.12	-0.214997	-0.198952	-0.216927	-0.337373	-0.428097	0.183776	-0.121861	0.439269	0.0153757	blue	FOXRED2
ENSG00000152455.14	0.194461	0.230669	0.316227	0.108809	0.1121	-0.3499	-0.142021	-0.148392	-0.131767	green	CCDC120
ENSG00000152464.13	0.142223	-0.00843932	0.0379587	0.0347767	0.082896	-0.108199	-0.103834	-0.0447642	0.127978	turquoise	SNX12
ENSG00000152465.16	0.126681	0.0746746	0.0781454	0.00106573	0.0753743	-0.208398	-0.160554	-0.0889075	-0.0304374	turquoise	DIAPH2
ENSG00000152518.6	-0.140114	-0.0957754	-0.193364	-0.0420978	-0.329359	0.176916	-0.0309533	0.364278	0.266234	blue	TMEM14A
ENSG00000152520.12	0.233712	0.201605	0.23796	0.22587	0.267533	-0.169474	-0.0120441	-0.289592	-0.204445	turquoise	CERCAM
ENSG00000152527.12	-0.234159	-0.242915	-0.0926383	-0.0671034	-0.163444	0.195809	0.0101921	0.179806	-0.244296	blue	HSP90AB1
ENSG00000152582.11	-0.224844	-0.251649	-0.10465	0.0692125	-0.299636	0.234912	-0.00280513	0.275987	0.0150325	blue	CD46
ENSG00000152778.8	0.188329	0.206626	-0.0316987	0.151662	0.169178	-0.140531	0.0171894	-0.151569	0.0530303	turquoise	OXSM
ENSG00000152894.13	-0.000976037	0.0352682	0.128356	0.136093	0.158701	0.0388401	0.17475	-0.168168	-0.085357	turquoise	ACTN4
ENSG00000152939.13	-0.0961733	-0.178721	-0.100399	-0.0935703	-0.189983	0.0650284	-0.113027	0.179624	0.0568728	blue	TGIF2
ENSG00000152942.17	0.017237	0.102931	0.0877327	0.0157311	0.106136	0.00111133	0.119288	-0.119813	-0.107363	turquoise	RPN2
ENSG00000152952.10	0.131627	0.0521898	0.125705	0.0268112	0.203796	-0.0378779	0.110085	-0.215789	-0.226594	turquoise	TMEM109
ENSG00000153029.13	-0.209303	-0.285522	-0.0923913	-0.130035	-0.132221	0.174835	-0.0188576	0.129257	-0.116159	blue	PMS2P1
ENSG00000153037.11	0.310245	0.249094	0.15928	-0.0418636	0.0346966	-0.35307	-0.247467	-0.00562058	-0.0766843	black	IDE
ENSG00000153113.22	-0.00367679	-0.0141419	-0.0244266	-0.0388658	-0.0725605	0.112898	0.132726	0.0443863	-0.0522174	red	EIF2B2
ENSG00000153130.16	0.126088	-0.0814913	0.132562	0.150889	0.272029	-0.181344	-0.0792757	-0.216931	-0.101088	turquoise	NOL10
ENSG00000153132.11	0.186917	0.213357	0.11629	-0.0437167	-0.0138333	-0.25637	-0.176254	-0.0186294	-0.128445	pink	GORASP2
ENSG00000153147.5	0.149974	0.0467293	0.0620545	0.308949	0.166255	-0.113718	-0.00886852	-0.169441	0.103433	magenta	DARS
ENSG00000153179.10	0.203	0.200083	0.130383	-0.164037	-0.0580937	-0.258406	-0.205586	0.100746	0.143017	yellow	FOXK1
ENSG00000153187.15	-0.0347555	0.0411061	-0.0466666	-0.128955	-0.369913	-0.0172478	-0.0493643	0.344435	0.221409	blue	PPP1R13B
ENSG00000153207.13	0.167834	0.0631835	0.290316	0.0309414	-0.00514615	-0.301563	-0.234908	-0.0143298	0.0503839	green	ZNF343
ENSG00000153310.17	0.24472	0.0709229	0.262789	0.302602	0.522858	-0.146856	0.137685	-0.507225	-0.148409	turquoise	HMG20A
ENSG00000153363.11	-0.113331	-0.110497	-0.18606	-0.197945	-0.168081	0.0352021	-0.0762453	0.223077	-0.0144685	blue	ZNF416
ENSG00000153395.8	0.0667425	-0.0507609	-0.258371	-0.0754841	-0.223922	0.108505	-0.154203	0.299981	0.332648	yellow	CD58
ENSG00000153404.12	-0.0719618	0.0660634	-0.103256	-0.0572089	-0.123562	0.218194	0.196528	0.111699	-0.029622	blue	SLC35D1
ENSG00000153406.12	-0.167204	-0.163553	-0.0832721	0.0470288	0.151157	0.31722	0.397657	-0.182663	-0.0570353	red	SLC38A9
ENSG00000153487.12	0.172923	0.218548	0.365958	0.0412543	0.209627	-0.330764	-0.0714274	-0.244294	-0.16573	green	SMIM4
ENSG00000153560.10	0.0818652	-0.0180572	-0.08247	-0.0494839	-0.173546	-0.0877304	-0.221346	0.236549	0.308409	yellow	ETHE1
ENSG00000153774.7	-0.0781652	-0.0592858	-0.124693	-0.150162	-0.192408	0.0232052	-0.160876	0.247354	0.0659132	blue	ZNF329
ENSG00000153814.10	-0.0658032	-0.209696	-0.197042	-0.0360588	-0.255274	0.099577	-0.129196	0.312166	0.133646	blue	RHBG
ENSG00000153815.15	0.0257324	-0.0324819	-0.337007	-0.270353	-0.609757	0.0653521	-0.274038	0.601826	0.379785	blue	FAM89A
ENSG00000153879.7	0.0183762	-0.0367784	0.0269217	-0.0786882	0.0465291	0.0219415	-0.0323845	-0.0351483	-0.055825	turquoise	PRR13
ENSG00000153904.17	0.278993	0.264326	0.236862	0.299818	0.218035	-0.193048	0.107585	-0.273896	-0.118031	magenta	CDK17
ENSG00000153989.7	0.178339	0.0589178	0.112481	-0.055834	-0.0693127	-0.190501	-0.223964	0.123572	0.131075	blue	RPL36
ENSG00000154079.5	-0.0936524	-0.0393908	-0.248241	-0.0172003	-0.0454552	0.0865146	0.0152382	0.0945822	0.0230951	blue	FOXP2
ENSG00000154114.11	0.0601066	0.0205423	-0.0729952	-0.0481425	-0.0225134	-0.126288	-0.23137	0.0720525	-0.01189	turquoise	LRP5
ENSG00000154127.8	0.200079	0.0762998	0.315669	0.245567	0.245252	-0.204668	-0.0107995	-0.257014	-0.0839219	turquoise	COA7
ENSG00000154237.11	-0.0759894	-0.197205	-0.196145	-0.206673	-0.407505	0.114908	-0.172335	0.415622	0.0565124	blue	MRPL48
ENSG00000154265.14	-0.19657	-0.337933	-0.296428	-0.315407	-0.334946	0.167058	-0.232091	0.37214	0.00614411	blue	NDUFA4
ENSG00000154328.14	-0.064106	-0.0812286	-0.128873	-0.0911212	-0.249366	-0.0149343	-0.223133	0.282263	0.107997	blue	MTCH1
ENSG00000154358.18	-0.109166	-0.0478737	-0.209217	0.0111608	-0.27467	0.180308	0.0396701	0.253106	0.0210087	blue	MTMR2
ENSG00000154447.13	0.505991	0.197718	0.11318	0.203217	0.218316	-0.261065	-0.0955598	-0.221758	0.00447471	black	PHF13
ENSG00000154582.15	0.310549	0.412134	0.233083	0.0836566	0.239753	-0.471631	-0.248978	-0.199059	0.102568	pink	ANXA3
ENSG00000154723.11	0.171534	0.191143	0.0765618	0.149724	0.351279	-0.209263	0.0807747	-0.255311	0.0368337	turquoise	UBE2V1
ENSG00000154814.12	0.130587	-0.0735624	0.0508896	0.101967	0.36766	-0.0217309	0.0142955	-0.302813	-0.119454	turquoise	CAPS
ENSG00000154822.14	0.0708815	0.130248	-0.0976126	0.0373875	-0.0682066	-0.124402	-0.150413	0.0904413	0.110277	yellow	BCAT2
ENSG00000154839.8	-0.120186	-0.0765489	0.405914	-0.0856657	-0.0808967	-0.0805181	-0.0965676	0.00330196	-0.121214	green	DMBX1
ENSG00000154864.10	-0.195907	-0.0751084	0.148865	0.0077011	-0.252714	0.0730582	0.0424209	0.215067	-0.0247424	blue	CXorf40B
ENSG00000154889.15	-0.202316	-0.203348	-0.119172	0.0542723	-0.0140752	0.202991	0.0565824	0.0530284	-0.0870826	turquoise	ZNF441
ENSG00000154945.6	0.0143998	0.0812626	0.088882	-0.11549	0.0109904	-0.154712	-0.193747	0.0390932	-0.0458024	turquoise	ZNF70
ENSG00000155034.17	-0.0745405	-0.128646	-0.197027	-0.119648	-0.42075	0.0638322	-0.194803	0.412832	0.175595	blue	LLGL1
ENSG00000155066.14	-0.0825609	-0.0677566	-0.228902	-0.1176	-0.235438	0.195443	0.0273201	0.250938	0.141231	blue	VCPKMT
ENSG00000155096.12	0.279628	0.123535	0.0973846	0.170947	0.303368	-0.273776	-0.128007	-0.247106	0.0195249	turquoise	ZNF740
ENSG00000155097.10	0.131772	0.123489	-0.0262627	0.045181	0.263154	-0.112499	-0.0445546	-0.227359	-0.00230206	turquoise	HNRNPA1L2
ENSG00000155115.6	0.198506	0.26978	0.225135	0.0501217	0.193475	-0.242585	-0.00623873	-0.216555	0.00935658	turquoise	GAMT
ENSG00000155189.10	0.333627	0.145919	0.0754069	0.0872338	0.110502	-0.270101	-0.179034	-0.0948427	0.145059	black	SLC22A23
ENSG00000155252.13	-0.00140258	-0.144619	-0.0786725	-0.0841107	-0.120496	-0.105575	-0.291055	0.155781	0.0182519	blue	MMAA
ENSG00000155256.16	-0.178087	-0.0193859	-0.0394598	-0.0191769	-0.124345	0.081949	0.0261563	0.10179	-0.0812651	blue	ADAM8
ENSG00000155304.5	0.18426	-0.02717	0.209574	-0.00912715	0.130173	-0.262087	-0.219459	-0.130183	-0.248898	turquoise	TMEM199
ENSG00000155313.14	-0.0749009	-0.139957	-0.0454262	-0.165445	-0.283425	0.0302477	-0.125609	0.298602	0.103154	blue	RBM12
ENSG00000155324.8	0.131729	-0.114417	-0.0628855	0.0780589	0.0684178	0.0936132	-0.0344034	-0.0289931	-0.0123168	turquoise	CAAP1
ENSG00000155330.8	0.0313131	-0.152449	-0.0729104	-0.229878	-0.117903	-0.10228	-0.341376	0.176378	-0.0224862	blue	CLK3
ENSG00000155363.17	-0.137204	0.000224743	-0.0727375	0.0399286	0.11323	0.274185	0.376703	-0.174331	-0.104188	red	PPP2R5A
ENSG00000155366.15	0.0581062	0.191559	0.0815333	0.0996266	0.317965	0.0656343	0.288107	-0.332116	-0.112135	turquoise	ELAVL1
ENSG00000155368.15	0.229147	0.55515	0.0986342	0.174808	0.281147	-0.199195	0.18279	-0.310663	-0.0965153	pink	RAE1
ENSG00000155380.10	0.303105	0.0764815	0.124364	0.204453	0.554036	-0.161155	0.046733	-0.484681	-0.143344	turquoise	NFYC
ENSG00000155438.10	0.374225	0.112579	0.0545559	0.101657	0.239656	-0.379721	-0.339707	-0.134921	0.116544	turquoise	TCFL5
ENSG00000155561.13	-0.0772183	-0.0570385	0.304697	0.0932643	0.158651	0.016979	0.211422	-0.204517	-0.171441	green	CALCOCO2
ENSG00000155657.22	-0.124915	-0.169775	-0.17072	-0.213521	-0.260253	0.0606548	-0.119624	0.317857	0.091847	blue	STK24
ENSG00000155660.9	-0.150386	-0.0748955	0.012814	0.108145	0.192172	0.396771	0.529632	-0.220924	-0.236099	red	FAM129B
ENSG00000155876.5	0.101697	0.00477649	-0.15972	-0.030512	0.157948	-0.0196219	-0.00751749	-0.135101	0.0267317	turquoise	ARRB2
ENSG00000155903.10	0.230586	0.0889975	-0.078507	-0.0741875	-0.076169	-0.26375	-0.330643	0.122319	0.132636	blue	OSBP
ENSG00000155975.8	0.219604	0.0617777	0.0818079	0.101785	0.202747	-0.18919	-0.125273	-0.182986	-0.0458227	turquoise	IL18BP
ENSG00000156026.13	0.187218	0.243936	0.110253	0.592215	0.319247	-0.165145	0.0737216	-0.305297	0.00722273	magenta	B3GAT3
ENSG00000156030.11	0.145097	0.138182	0.0280768	0.0882383	0.352711	-0.0907005	0.139679	-0.328011	-0.21747	turquoise	NFXL1
ENSG00000156052.9	-0.121792	-0.176135	-0.217464	-0.132885	-0.402202	0.236638	-0.0874114	0.445195	0.220097	blue	STRIP1
ENSG00000156110.12	0.0733821	0.142194	0.183333	0.735222	0.337306	0.0255608	0.328565	-0.380018	-0.127302	magenta	ALDOA
ENSG00000156136.8	0.208686	0.105131	0.186855	0.0510254	0.288265	-0.358725	-0.21355	-0.261786	-0.143158	turquoise	UBE3A
ENSG00000156162.15	-0.0728158	0.125545	0.159428	0.0819021	0.228448	-0.156676	0.0511573	-0.228076	-0.052366	turquoise	DUSP6
ENSG00000156469.7	-0.00103079	-0.0382032	0.129457	-0.0187442	0.217024	-0.137453	-0.0985564	-0.183429	-0.0918751	turquoise	SLC15A4
ENSG00000156482.9	0.164818	0.2146	-0.0412368	0.136856	0.491736	-0.16501	0.102653	-0.43108	0.202354	turquoise	GLTP
ENSG00000156587.14	-0.232104	-0.0976751	-0.1801	0.0417941	0.043342	0.360718	0.28411	-0.0572902	-0.044061	brown	LHFPL4
ENSG00000156642.15	0.0646872	0.195601	0.0293824	0.104652	0.273141	-0.0371812	0.180019	-0.230746	-0.112962	turquoise	CEP19
ENSG00000156650.11	-0.142294	0.0195894	0.0358579	0.32757	-0.104361	0.0707628	0.110505	0.0547061	0.102058	magenta	TMEM219
ENSG00000156711.15	-0.168647	-0.125365	0.0320891	0.0541745	-0.0158344	0.339232	0.262643	-0.0159454	-0.0158573	brown	DLGAP5
ENSG00000156735.9	0.0963572	0.163091	0.0643449	0.0735062	0.101667	-0.140032	0.0322504	-0.118057	-0.00884759	turquoise	LOXL4
ENSG00000156831.6	0.099166	0.0625544	0.181305	0.185846	0.361623	-0.0713641	0.105074	-0.330671	-0.166773	turquoise	GTF2A2
ENSG00000156858.10	-0.205487	-0.0914571	-0.273714	-0.115004	-0.332444	0.181558	-0.000104069	0.343815	0.232032	blue	SEPW1
ENSG00000156875.12	0.122024	0.175895	0.147888	0.285635	0.303128	-0.165156	0.024235	-0.323011	-0.115587	turquoise	HIPK2
ENSG00000156958.13	0.154284	0.0986308	0.0743235	0.203524	0.296125	-0.124688	0.0783911	-0.294572	-0.134512	turquoise	ANKRD13D
ENSG00000156959.8	-0.186324	-0.0433487	-0.179589	-0.275544	-0.353632	0.0226666	-0.217499	0.415403	0.220575	blue	MED26
ENSG00000156968.8	0.143418	0.0995801	-0.0791248	-0.00479826	0.0159296	-0.0126458	0.0910321	-0.0432526	-0.00391841	turquoise	IL17RA
ENSG00000156973.12	0.0329282	0.050801	0.192919	0.0495668	0.214905	-0.0174134	0.241321	-0.274552	-0.230151	turquoise	ARMC1
ENSG00000157014.9	-0.0277074	-0.0551491	-0.0933311	-0.126031	-0.207651	0.0052246	-0.231343	0.266836	0.236311	blue	POLR2I
ENSG00000157045.7	-0.0400316	0.0882373	0.094495	-0.0203508	0.0431233	-0.0231417	-0.00650429	-0.0806383	-0.244126	turquoise	CSTF2T
ENSG00000157064.9	-0.108306	-0.206321	-0.18989	-0.0357971	-0.18434	0.237579	0.140409	0.16883	0.0665847	blue	TNRC6C
ENSG00000157077.13	-0.161112	-0.0565865	-0.158632	-0.15775	-0.322275	0.0760477	-0.114765	0.304572	0.153237	blue	MCUR1
ENSG00000157106.15	-0.104444	-0.283985	-0.0316044	-0.0225184	-0.312503	-0.0457255	-0.325858	0.349905	0.148277	blue	HNRNPA0
ENSG00000157191.18	0.0850199	0.171026	0.116797	0.253572	0.147073	-0.0452102	0.180544	-0.197069	-0.0996866	magenta	SS18L2
ENSG00000157216.14	-0.180759	-0.0672747	-0.256754	-0.081934	-0.323681	0.218341	0.0141183	0.336101	0.151925	blue	TTC17
ENSG00000157303.9	-0.171093	-0.170401	-0.222566	0.157178	-0.0605869	0.278936	0.13725	0.0954052	0.138391	brown	SNX27
ENSG00000157349.14	0.18673	0.255053	0.089891	0.191732	0.167904	-0.132373	0.0819543	-0.204289	-0.0827306	turquoise	WASH1
ENSG00000157379.12	-0.147475	-0.153999	-0.16563	-0.120107	-0.0431817	0.283452	0.154525	0.0262479	-0.0318199	brown	PLA2G4F
ENSG00000157426.12	-0.13498	-0.214257	-0.130077	-0.0420147	-0.191961	0.0856736	-0.078097	0.211381	0.0215828	blue	DBN1
ENSG00000157570.10	-0.0922062	-0.0107756	-0.222332	-0.053187	-0.171483	0.109028	-0.0380062	0.238628	0.151944	blue	PCDH1
ENSG00000157637.11	-0.269462	-0.0996671	-0.241287	-0.14582	-0.423676	0.279892	-0.00693479	0.424055	0.162237	blue	NCOR2
ENSG00000157657.13	-0.169728	-0.0666576	-0.121599	-0.0420039	-0.346992	0.113231	-0.0269266	0.313217	0.131566	blue	ASXL2
ENSG00000157741.13	-0.234126	-0.147614	-0.269666	-0.145607	-0.457649	0.141228	-0.173263	0.503957	0.183245	blue	ACTL6A
ENSG00000157764.11	-0.127156	-0.120002	-0.0465581	-0.165371	-0.366519	0.0552559	-0.125918	0.350834	0.0483762	blue	CBWD2
ENSG00000157823.15	-0.182891	-0.151622	-0.0744306	-0.159462	-0.183722	0.116816	-0.025092	0.202659	0.12374	blue	CTDSP2
ENSG00000157870.13	0.0275715	0.123507	-0.0475136	0.114033	0.042848	0.0401165	0.201152	-0.119033	0.0569109	turquoise	HOXA11
ENSG00000157881.12	-0.0747686	-0.112438	0.0475072	0.0145802	0.166699	0.0707529	0.130812	-0.191991	-0.105793	turquoise	SLC25A5
ENSG00000157954.13	-0.127886	-0.108274	-0.23757	-0.221809	-0.32029	0.0794992	-0.188097	0.34163	0.130456	blue	VIMP
ENSG00000158006.12	-0.215138	-0.125781	-0.00714785	-0.109379	-0.212508	0.189856	0.0645656	0.141099	-0.0248897	blue	PGM3
ENSG00000158023.8	0.0190355	-0.153948	-0.0234468	-0.0890219	-0.068805	-0.0955291	-0.255906	0.0798016	0.0572847	blue	RPL27A
ENSG00000158158.10	-0.036608	-0.171622	-0.186729	-0.12521	-0.146067	0.102528	-0.0798946	0.152548	-0.102001	blue	TIMM9
ENSG00000158286.11	-0.0335217	-0.140143	-0.186718	-0.0278362	-0.258017	0.0697167	-0.142569	0.257135	0.175528	blue	WDR54
ENSG00000158290.15	0.0882109	-0.00788472	0.0462837	0.0277878	0.107436	-0.194201	-0.144398	-0.0500081	-0.108999	turquoise	ZNF8
ENSG00000158292.6	-0.151459	-0.0661058	-0.190771	-0.0854182	-0.303256	0.238511	0.0607207	0.271941	0.0292312	blue	RHBDD2
ENSG00000158470.5	-0.149626	-0.221671	-0.17598	-0.131285	-0.332424	0.119555	-0.264896	0.399506	0.348522	blue	MTCO1P12
ENSG00000158623.13	-0.0686848	0.00904719	-0.117212	-0.0810202	-0.108593	0.120896	0.0464518	0.139964	0.0576312	blue	CHST12
ENSG00000158636.15	-0.118585	-0.121388	-0.0426644	-0.174834	-0.198539	0.0369388	-0.184237	0.221477	0.0538688	blue	VMA21
ENSG00000158769.16	-0.209972	-0.194158	-0.156667	-0.24249	-0.203887	0.306863	0.0535121	0.249849	0.0301813	brown	TTC38
ENSG00000158863.20	-0.110991	-0.142541	-0.261732	-0.0336312	-0.170654	0.236201	0.0240279	0.176807	0.159493	blue	BUD13
ENSG00000158864.11	-0.0761487	0.0514704	0.133825	0.1607	0.441141	0.126906	0.477369	-0.464547	-0.289552	turquoise	FOSL2
ENSG00000159063.11	-0.131183	0.028771	0.184577	0.107172	0.315995	0.13435	0.391865	-0.334229	-0.16856	turquoise	RRP1B
ENSG00000159079.17	0.0723026	-0.0677821	-0.239399	-0.13769	-0.238241	-0.00934207	-0.238	0.314156	0.32296	blue	SNHG6
ENSG00000159131.15	0.172806	0.0473821	0.0331508	0.170714	0.353431	-0.0634944	0.138228	-0.327248	0.0317819	turquoise	CASC8
ENSG00000159167.10	0.0697635	-0.167636	-0.137629	-0.125448	-0.0936253	0.0217801	-0.243529	0.160775	0.134426	blue	HAUS2
ENSG00000159216.17	0.0500298	-0.178029	-0.0723261	-0.0769098	-0.25983	0.0770052	-0.115514	0.267076	0.134669	blue	H2AFJ
ENSG00000159314.10	-0.149958	-0.122629	-0.111233	-0.0535158	-0.111964	0.304814	0.115181	0.123413	0.119188	brown	POFUT2
ENSG00000159339.12	0.2146	0.130607	-0.0429772	-0.0096887	0.0491393	-0.0411458	-0.0168058	-0.0596983	0.0643171	turquoise	UBE3C
ENSG00000159346.11	0.0416447	0.0131597	0.164568	0.101575	0.49326	-0.00849778	0.2254	-0.452271	-0.43574	turquoise	TCF7
ENSG00000159348.11	-0.118151	-0.0281438	0.0587378	0.106071	0.193545	0.188442	0.406848	-0.230009	-0.134107	red	OSTM1
ENSG00000159352.14	-0.222239	0.0531073	0.0591682	0.196523	0.230419	0.18498	0.444415	-0.268585	-0.121824	turquoise	RNF126
ENSG00000159399.8	0.303941	0.1758	-0.14259	0.0115852	0.0139545	-0.211438	-0.177517	0.0119755	0.180383	black	RPL3
ENSG00000159403.14	-0.263462	-0.155081	-0.060175	0.086986	0.0567553	0.389097	0.306039	-0.0536316	-0.117995	brown	SGCB
ENSG00000159423.15	-0.0472808	0.0321573	0.0343879	0.0227412	0.0837656	0.158692	0.320359	-0.110771	-0.075776	red	MLXIPL
ENSG00000159461.13	0.101921	-0.0362033	-0.276036	-0.165281	-0.211292	0.00172971	-0.215729	0.276078	0.106294	blue	MYADM
ENSG00000159596.6	0.0192131	-0.0294931	0.269964	0.159578	0.365892	-0.0691837	0.121484	-0.390204	-0.22232	turquoise	MAP4
ENSG00000159792.8	-0.0925161	-0.147233	-0.155049	0.0765126	0.0589934	0.18539	0.100059	-0.0395019	-0.0546701	turquoise	D2HGDH
ENSG00000159840.14	0.398921	0.283236	0.162569	0.130837	0.330871	-0.159162	0.148906	-0.339927	3.44149e-05	black	ABI1
ENSG00000159842.13	-0.0770967	-0.0189862	-0.105624	-0.04154	-0.0602144	0.173528	0.124932	0.0586396	0.0181015	red	RBM10
ENSG00000160007.16	-0.166374	-0.202947	-0.0557521	-0.124245	-0.210915	0.257168	0.125409	0.222294	0.118522	blue	HOMEZ
ENSG00000160113.5	-0.10256	0.0135158	-0.198385	-0.072505	-0.233828	0.2127	0.119022	0.231123	0.292687	yellow	HSPA1A
ENSG00000160124.8	0.164843	-0.00542043	0.00144908	-0.0680095	-0.101644	-0.292519	-0.420532	0.189843	0.157871	blue	LRRC59
ENSG00000160208.12	0.00498243	-0.0205904	0.0145288	0.111241	-0.0348734	-0.0904671	-0.099939	0.0501365	0.29859	yellow	ABHD14A
ENSG00000160216.17	-0.266832	-0.197169	-0.15017	-0.114691	-0.269976	0.242942	0.0450258	0.320993	0.211506	blue	DSTNP2
ENSG00000160218.11	-0.114799	-0.114834	-0.0854412	-0.254914	-0.249028	0.0580544	-0.198169	0.314413	0.136058	blue	FLJ42969
ENSG00000160271.13	-0.13184	-0.0572512	-0.253946	-0.0927849	-0.260183	0.0458424	-0.184337	0.309237	0.246899	blue	LHFPL2
ENSG00000160284.13	-0.0366663	0.125358	0.111494	0.14356	0.180124	0.014527	0.189593	-0.203184	0.0160645	turquoise	PDCD6
ENSG00000160293.15	-0.139793	-0.0769594	-0.188484	0.0200474	-0.335195	0.143614	-0.101581	0.310604	0.208567	blue	COMMD10
ENSG00000160310.15	-0.133526	0.0529947	0.0736614	0.185536	0.189453	0.187851	0.399014	-0.24968	-0.0634404	brown	LRRC37BP1
ENSG00000160326.12	0.00241462	0.0256118	0.0653919	0.225696	0.181788	0.055015	0.195183	-0.22983	-0.16037	turquoise	TNFAIP8
ENSG00000160404.16	-0.136166	0.0749557	0.23919	0.162994	0.438842	0.132245	0.418818	-0.492993	-0.300074	turquoise	OSBPL10
ENSG00000160408.13	0.175661	0.241869	-0.0733125	0.132594	-0.0754716	-0.221173	-0.190766	0.0748501	0.17496	yellow	STAC
ENSG00000160551.8	0.00889368	-0.173399	-0.207144	-0.165799	-0.342186	0.00915752	-0.315557	0.409717	0.277576	blue	CA13
ENSG00000160563.12	0.0324474	0.09641	0.214156	0.198002	0.308357	-0.0456868	0.202615	-0.309378	-0.123263	turquoise	2017-03-06
ENSG00000160584.14	-0.0558522	-0.0887837	0.0214689	-0.122822	-0.191791	-0.0223048	-0.188969	0.199461	0.0630547	blue	ALDH16A1
ENSG00000160613.11	0.00249218	-0.00928849	-0.216372	-0.215091	-0.348896	0.106699	-0.129709	0.333129	0.136128	blue	NAGS
ENSG00000160695.13	-0.0260518	-0.0856062	-0.107131	-0.0704815	-0.0648728	0.0630285	0.00370316	0.0868794	-0.0649194	blue	AMDHD2
ENSG00000160752.13	0.0407085	0.21556	0.230542	0.356982	0.604151	0.0505896	0.560155	-0.636017	-0.24002	turquoise	AP1M1
ENSG00000160767.19	-0.0798773	0.0747682	-0.218838	-0.14739	-0.277342	0.0417378	-0.00534346	0.285992	0.376511	yellow	EVC
ENSG00000160783.18	-0.0538336	0.199344	0.204165	0.0173892	0.209817	0.0135602	0.302037	-0.248978	-0.0637592	turquoise	IGF2BP2
ENSG00000160886.12	0.25531	0.382333	0.0330448	0.148252	0.250788	-0.211912	0.0805577	-0.253784	0.130589	turquoise	PCSK6
ENSG00000160888.6	0.369705	0.314509	-0.189646	-0.0677619	0.0741407	-0.11808	-0.0516205	-0.0421721	0.0534499	black	INPP5B
ENSG00000160932.9	-0.12848	0.135995	0.019283	0.182855	0.400824	0.282946	0.497009	-0.431023	-0.129326	red	FANCI
ENSG00000160972.8	-0.157986	-0.00426659	-0.296373	-0.135976	-0.274963	0.135183	-0.0273264	0.290402	0.197272	blue	TIGD7
ENSG00000161016.14	-0.0275941	0.0376576	-0.152093	0.0357421	-0.00554085	0.042256	0.0498795	0.0257368	0.502278	turquoise	GID4
ENSG00000161021.10	-0.19134	-0.135112	-0.161886	-0.114476	-0.283115	0.10056	-0.168523	0.282693	0.197067	blue	FAM199X
ENSG00000161048.10	-0.0217328	-0.00458311	-0.106423	-0.0379951	-0.177061	-0.0430827	-0.0799331	0.188357	-0.014042	blue	SMPD2
ENSG00000161057.9	-0.0735953	0.187881	0.185744	0.235863	0.485956	-0.0149203	0.355866	-0.488172	-0.238743	turquoise	PRADC1
ENSG00000161202.16	-0.192463	-0.199446	-0.0714947	-0.019085	-0.26759	0.201251	0.0565911	0.258055	0.232779	blue	DDX55
ENSG00000161203.12	0.0691777	0.0633032	0.168332	0.257217	0.575497	0.0207305	0.392394	-0.569343	-0.244496	turquoise	SLC38A1
ENSG00000161204.10	0.122129	0.0437067	0.17972	0.0683349	0.226563	-0.104894	0.0602475	-0.257091	-0.111912	turquoise	C12orf49
ENSG00000161267.10	0.024271	0.130574	0.100521	0.218283	0.236623	-0.00131716	0.196152	-0.262743	-0.103934	turquoise	FAM65B
ENSG00000161533.10	-0.0958736	-0.192459	-0.211921	-0.0373201	-0.0424476	0.221727	-0.0577376	0.11018	0.189862	brown	PLEKHG4
ENSG00000161654.8	0.183719	0.099977	0.240008	0.0915914	0.360939	-0.137572	0.0996653	-0.347639	0.0961438	turquoise	CEACAM19
ENSG00000161791.12	-0.0343667	-0.0529305	-0.291161	-0.140896	-0.360175	0.0994941	-0.0974259	0.345864	0.166309	blue	METAP1
ENSG00000161813.19	0.313202	0.0589351	0.14047	0.0331613	0.0632502	-0.238545	-0.262593	-0.0563601	0.0876126	black	INTU
ENSG00000161921.13	-0.266582	-0.195751	-0.023501	-0.0819624	-0.0751291	0.354941	0.131951	0.0734381	-0.181982	brown	CCBE1
ENSG00000161970.11	-0.234656	-0.412281	-0.334227	-0.324101	-0.597924	0.186711	-0.368468	0.698889	0.619837	blue	SMTN
ENSG00000161980.5	0.129544	0.235708	0.213521	0.0142993	0.307247	-0.147793	0.158135	-0.320044	-0.0769346	turquoise	TOM1L2
ENSG00000161996.16	-0.147521	-0.141647	-0.0780662	-0.210381	-0.342583	0.233982	-0.000959006	0.325774	0.115941	blue	CREG2
ENSG00000162066.13	0.00822179	0.111542	-0.0788025	-0.00913108	-0.0859979	0.0778693	0.160563	0.013934	0.0180873	red	PHLDB3
ENSG00000162076.11	-0.0298477	0.1102	-0.0521821	0.0814182	0.289987	-0.0468191	0.161354	-0.250105	-0.133733	turquoise	BDNF
ENSG00000162104.8	0.00202818	-0.0540572	-0.304974	-0.0788406	-0.323897	0.092721	-0.119687	0.33515	0.264128	blue	SMCR8
ENSG00000162105.15	-0.154875	-0.0986319	-0.107246	-0.145879	-0.247773	0.231479	0.0424578	0.229059	0.0476533	blue	PSMB4
[truncated: 1,176 more rows]
